# Supplementary material for: Potent pincer-zinc catalyzed homogeneous α-alkylation and Friedländer quinoline synthesis reaction of secondary alcohols/ketones with primary alcohols
Source: Royal Society of Chemistry journal article supplement (doi:10.1039/d4ob00988f), 2024-01-01
Supplement: d4ob00988f1.pdf [file d4ob00988f1.pdf]

## Electronic Supplementary Information

### Potent Pincer-Zinc Catalyzed Homogeneous $\alpha$ -Alkylation and Friedländer Quinoline Synthesis of Secondary alcohols/Ketones with Primary Alcohols

Debashis Jana<sup>a</sup>, Sima Roy<sup>a</sup>, Srijita Naskar<sup>a</sup>, Supriyo Halder<sup>a</sup>, Gopal Kanrar<sup>b</sup>, Kausikisankar  
Pramanik<sup>a\*</sup>

<sup>a</sup>Department of Chemistry, Jadavpur University, Kolkata – 700032, India

<sup>b</sup>Department of Chemistry, St. Xavier's College (Autonomous), Kolkata – 700016, India

\*To whom correspondence should be addressed.

kpramanik@hotmail.com Tel: +91 94333 66013

## INDEX

|    |                                                                                                                                                     |         |
|----|-----------------------------------------------------------------------------------------------------------------------------------------------------|---------|
| 1  | Crystallographic details of complexes                                                                                                               | S3-S4   |
| 2  | Physical measurements, computational study, synthetic procedure for the preparation of ligands, complexes.                                          | S5-S7   |
| 3  | NMR Spectrum of Complexes                                                                                                                           | S8-S9   |
| 4  | MO Contributions and optimized geometry of complexes                                                                                                | S10-S11 |
| 5  | Optical Transitions of Complexes and NTOs of Complexes                                                                                              | S11-S18 |
| 6  | MO Diagram of Complexes                                                                                                                             | S19-S20 |
| 7  | Theoretical and experimental absorption spectrum                                                                                                    | S21     |
| 8  | Coordinates of Optimized Geometry                                                                                                                   | S21-S23 |
| 9  | IR spectrum of reaction mixture, electronic spectra for the detection of H <sub>2</sub> O <sub>2</sub> , electrochemical study of complex <b>1a</b> | S24     |
| 10 | X-Ray crystallographic information of <b>10aj</b> and <b>5ag</b>                                                                                    | S25-S26 |
| 11 | Optimization table for Friedländer Quinoline Synthesis                                                                                              | S27-S28 |
| 12 | General procedure for Zn-catalyzed reactions                                                                                                        | S29     |
| 13 | Characterization data of alkylated ketones                                                                                                          | S29-S32 |
| 14 | Characterization data of quinolines                                                                                                                 | S32-S38 |
| 15 | NMR spectra of alkylated ketones                                                                                                                    | S39-S53 |
| 16 | NMR spectra of quinolines                                                                                                                           | S54-S85 |
| 16 | Some NMR spectra and HRMS for mechanistic study                                                                                                     | S86-S89 |
| 17 | Appendix: supplementary data                                                                                                                        | S90     |
| 18 | References                                                                                                                                          | S90-S92 |

**Table S1.** Crystallographic Details of complexes **1a** and **1b**.

|                                                                                                                                                                                                                                                                                                                                                                                   | <b>1a</b>                                                         | <b>1b</b>                                                         |
|-----------------------------------------------------------------------------------------------------------------------------------------------------------------------------------------------------------------------------------------------------------------------------------------------------------------------------------------------------------------------------------|-------------------------------------------------------------------|-------------------------------------------------------------------|
| Empirical formula                                                                                                                                                                                                                                                                                                                                                                 | C <sub>17</sub> H <sub>12</sub> N <sub>5</sub> Cl <sub>3</sub> Zn | C <sub>17</sub> H <sub>13</sub> N <sub>5</sub> Cl <sub>2</sub> Zn |
| <i>T</i> /K                                                                                                                                                                                                                                                                                                                                                                       | 298K                                                              | 298K                                                              |
| fw                                                                                                                                                                                                                                                                                                                                                                                | 458.04                                                            | 847.19                                                            |
| Crystal system                                                                                                                                                                                                                                                                                                                                                                    | Monoclinic                                                        | Orthorhombic                                                      |
| Space Group                                                                                                                                                                                                                                                                                                                                                                       | C12/c1                                                            | Pbca                                                              |
| <i>a</i> /Å                                                                                                                                                                                                                                                                                                                                                                       | 14.0244(8)                                                        | 13.2739(4)                                                        |
| <i>b</i> /Å                                                                                                                                                                                                                                                                                                                                                                       | 15.2683(9)                                                        | 13.0215(4)                                                        |
| <i>c</i> /Å                                                                                                                                                                                                                                                                                                                                                                       | 19.1822(11)                                                       | 41.0373(12)                                                       |
| <i>α</i> /deg                                                                                                                                                                                                                                                                                                                                                                     | 90                                                                | 90                                                                |
| <i>β</i> /deg                                                                                                                                                                                                                                                                                                                                                                     | 105.697(2)                                                        | 90                                                                |
| <i>γ</i> /deg                                                                                                                                                                                                                                                                                                                                                                     | 90                                                                | 90                                                                |
| <i>V</i> /Å <sup>3</sup>                                                                                                                                                                                                                                                                                                                                                          | 3954.3(4)                                                         | 7093.1(4)                                                         |
| <i>Z</i>                                                                                                                                                                                                                                                                                                                                                                          | 8                                                                 | 8                                                                 |
| <i>D<sub>c</sub></i> /Mgm <sup>-3</sup>                                                                                                                                                                                                                                                                                                                                           | 1.539                                                             | 1.587                                                             |
| <i>μ</i> /mm <sup>-1</sup>                                                                                                                                                                                                                                                                                                                                                        | 1.658                                                             | 1.696                                                             |
| <i>F</i> (000)                                                                                                                                                                                                                                                                                                                                                                    | 1840                                                              | 3424                                                              |
| cryst size/mm <sup>3</sup>                                                                                                                                                                                                                                                                                                                                                        | 0.5 × 0.3 × 0.2                                                   | 0.5 × 0.3 × 0.2                                                   |
| <i>θ</i> /deg                                                                                                                                                                                                                                                                                                                                                                     | 2.091 – 25.712                                                    | 2.405 – 28.733                                                    |
| Measured reflns                                                                                                                                                                                                                                                                                                                                                                   | 9889                                                              | 9139                                                              |
| Unique reflns                                                                                                                                                                                                                                                                                                                                                                     | 3912                                                              | 10062                                                             |
| <sup>a</sup> GOF on <i>F</i> <sup>2</sup>                                                                                                                                                                                                                                                                                                                                         | 1.117                                                             | 1.191                                                             |
| <i>R</i> 1 <sup>b</sup> , <i>wR</i> 2 <sup>c</sup> [ <i>I</i> > 2σ( <i>I</i> )]                                                                                                                                                                                                                                                                                                   | 0.0425, 0.0986                                                    | 0.0368, 0.0827                                                    |
| <i>R</i> 1, <i>wR</i> 2                                                                                                                                                                                                                                                                                                                                                           | 0.0521, 0.1045                                                    | 0.0423, 0.0858                                                    |
| <sup>a</sup> GOF = {Σ[w( <i>F<sub>o</sub></i> <sup>2</sup> - <i>F<sub>c</sub></i> <sup>2</sup> )]/( <i>n</i> - <i>p</i> )} <sup>1/2</sup> . <sup>b</sup> <i>R</i> 1 = Σ [  <i>F<sub>o</sub></i>  - <i>F<sub>c</sub></i> ]/ Σ   <i>F<sub>o</sub></i>  .                                                                                                                            |                                                                   |                                                                   |
| <sup>c</sup> <i>wR</i> 2 = [Σ [w( <i>F<sub>o</sub></i> <sup>2</sup> - <i>F<sub>c</sub></i> <sup>2</sup> )]/ Σ [w( <i>F<sub>o</sub></i> <sup>2</sup> )] <sup>1/2</sup> where <i>w</i> = 1/[σ <sup>2</sup> ( <i>F<sub>o</sub></i> <sup>2</sup> )+( <i>aP</i> ) <sup>2</sup> + <i>bP</i> ], <i>P</i> = ( <i>F<sub>o</sub></i> <sup>2</sup> +2 <i>F<sub>c</sub></i> <sup>2</sup> )/3. |                                                                   |                                                                   |

**Table S2.** Selected Experimental and Theoretical Bond Parameters of **1a** and **1b** complex.

| <b>1a</b>        |              |              | <b>1b</b>        |                       |              |
|------------------|--------------|--------------|------------------|-----------------------|--------------|
| <b>Parameter</b> | <b>Expt.</b> | <b>Theo.</b> | <b>Parameter</b> | <b>Expt.(average)</b> | <b>Theo.</b> |
| Zn1–Cl1          | 2.2125(9)    | 2.349        | Zn1–Cl1          | 2.221(7)              | 2.299        |
| Zn1–Cl2          | 2.2272(9)    | 2.355        | Zn1–Cl2          | 2.210(7)              | 2.283        |
| Zn1–N1           | 2.167(3)     | 2.228        | Zn1–N1           | 2.170(19)             | 2.279        |
| Zn1–N3           | 2.127(2)     | 2.245        | Zn1–N3           | 2.126(17)             | 2.246        |
| Zn1–N4           | 2.466(3)     | 2.593        | Zn1–N4           | 2.452(17)             | 2.451        |
| N2–N3            | 1.260(3)     | 1.261        | N2–N3            | 1.259(2)              | 1.261        |
| N4–N5            | 1.263(4)     | 1.263        | N4–N5            | 1.257(3)              | 1.265        |
| Cl1Zn1Cl2        | 123.35(4)    | 129.99       | Cl1Zn1Cl2        | 126.54(3)             | 132.27       |
| Cl1Zn1N4         | 94.71(6)     | 97.82        | Cl1Zn1N4         | 95.78(5)              | 100.58       |
| Cl2Zn1N4         | 98.87(6)     | 96.67        | Cl2Zn1N4         | 96.53(5)              | 96.89        |
| N1Zn1Cl1         | 99.51(7)     | 99.76        | N1Zn1Cl1         | 99.90(5)              | 97.66        |
| N1Zn1Cl2         | 100.84(7)    | 99.57        | N1Zn1Cl2         | 99.98(5)              | 96.39        |
| N1Zn1N4          | 143.59(9)    | 139.22       | N1Zn1N4          | 143.54(6)             | 140.26       |
| N3Zn1Cl1         | 126.89(7)    | 127.45       | N3Zn1Cl1         | 115.64(5)             | 107.27       |
| N3Zn1Cl2         | 109.54(7)    | 102.35       | N3Zn1Cl2         | 117.54(5)             | 120.41       |
| N3Zn1N1          | 73.25(9)     | 71.54        | N3Zn1N1          | 73.14(7)              | 70.10        |
| N3Zn1N4          | 71.40(9)     | 68.88        | N3Zn1N4          | 72.51(6)              | 70.86        |
| C1N1Zn1          | 128.9(2)     | 127.08       | C1N1Zn1          | 128.99(17)            | 126.89       |
| C5N1Zn1          | 113.5(2)     | 114.02       | C5N1Zn1          | 113.04(2)             | 114.16       |
| N3N2C5           | 113.6(2)     | 114.92       | N3N2C5           | 113.30(17)            | 114.25       |
| C6N3Zn1          | 123.02(19)   | 123.35       | C6N3Zn1          | 122.48(13)            | 120.81       |
| N2N3C6           | 116.0(2)     | 117.11       | N2N3C6           | 116.38(17)            | 117.51       |
| N2N3Zn1          | 120.85(19)   | 119.38       | N2N3Zn1          | 120.73(13)            | 121.50       |
| C11N4Zn1         | 110.28(18)   | 110.20       | C11N4Zn1         | 110.11(12)            | 112.27       |
| N5N4C11          | 112.4(3)     | 113.42       | N5N4C11          | 113.04(18)            | 113.33       |
| N5N4Zn1          | 135.2(2)     | 133.11       | N5N4Zn1          | 134.57(15)            | 132.25       |
| N4N5C12          | 116.6(3)     | 118.24       | N4N5C12          | 116.34(19)            | 118.41       |

## Physical measurements

NMR spectra ( $^1\text{H}$ ,  $^{13}\text{C}$ , and  $^{19}\text{F}$ ) of all complexes were obtained from Bruker FT 300 and 400 MHz spectrometer. Electron Paramagnetic Resonance (EPR) spectrum was taken for the sample in standard quartz EPR tubes using a JEOL JES-FA200 X-band spectrometer. Instrument settings: microwave frequency, 9.458 GHz; microwave power, 0.998 mW; modulation frequency, 100 kHz. According to residual protium in the NMR solvent ( $\text{CHCl}_3 = \delta 7.26$ ), chemical shifts for protons are reported in parts per million downfield from tetramethylsilane. The chemical shifts for carbon produced from tetramethylsilane are given in parts per million with references to the carbon resonances of the solvent ( $\text{CDCl}_3 = \delta 77.16$ ). The following data are shown: chemical shift, multiplicity (s = singlet, d = doublet, t = triplet, q = quartet, m = multiplet, dd = doublet of doublets, ddd = doublet of doublets of doublets, dt = doublet of triplets, dq = doublet of quartets, tt = triplet of triplets, td = triplet of doublets, coupling constants in Hertz (Hz), integration. Elemental analysis (C, H, N) was done on a Perkin Elmer 2400 series II Analyzer. Infrared spectra were acquired from PerkinElmer L-0010 spectrometer. The absorption spectra were recorded using PerkinElmer LAMDA 25 spectrometer with solute concentration about  $10^{-5}$  M.

## Computational Study

The singlet ground state ( $S_0$ ) and excited state molecular geometries of synthesised complex **1a** and **1b** were computed by DFT method by employing (R)B3LYP<sup>1,2</sup> in GAUSSIAN 09<sup>3</sup> programme package. The solution phase optimised geometries of the complexes were found without applying any geometry constraints. In order to verify all stationary points as the true minima in potential energy surface, frequency calculation was executed. The absence of any imaginary frequency (NImag = 0) indicates that all the obtained stationary points are indeed the true minima in potential energy surface. The X-Ray positional coordinates of complex **1a** and **1b** were directly used as the initial input for geometry optimisation calculation. By using these ground state optimised geometries as well as excited state geometries, we performed subsequent Single Point Energy and TD-DFT<sup>4-7</sup> calculation. In TD-DFT calculation we employ conductor like continuum model (CPCM)<sup>8-10</sup> and dichloromethane ( $\text{CH}_2\text{Cl}_2$ ) as solvent to simulate absorption spectra in dichloromethane solvent. The lowest 100 singlet-singlet transitions in absorption and emission processes for the complex **1a** and **1b** were evaluated gradually. The experimental results and the results obtained from TD calculations were qualitatively comparable. Presently the approach of

TD-DFT is documented as a rigorous formalism for the electronic excitation energies among the DFT framework for calculating spectral properties of many transition metal complexes<sup>11-14</sup>. In order to acquire the information and nature of absorption and emission processes natural transition orbital (NTO) analysis was executed. This method delivers the most accurate representation of the transition density between the ground and excited states in terms of an expansion into single-particle transitions (hole and electron states for each given excitation). We refer to the unoccupied and occupied NTOs as “electron” and “hole” transition orbitals. The computed vertical transitions were calculated at the equilibrium geometry of the  $S_0$  state and described in terms of one-electron excitations of molecular orbitals of the corresponding  $S_0$  geometry. The calculated transitions with moderate intensities ( $f \geq 0.02$ ) can be envisaged going from the lower to the higher energy region of the spectrum. The zinc atom was described by a double- $\zeta$  basis set with the effective core potential of Hay and Wadt (LANL2DZ)<sup>15,16</sup>, and the 6-311++G(d,p)<sup>17,18</sup> basis set was used for the other elements except hydrogen atom (6-31G) present in the complexes to optimize the ground state geometries. The calculated electronic density plots for frontier molecular orbitals were prepared by using the GaussView 6.0 software. GaussSum program, version 3.2<sup>19</sup>, was used to calculate the molecular orbital contributions from groups or atoms.

### Synthesis of ligands:

The organic ligands  $L^{Cl}$  and  $L^H$  comprising two electron-deficient azo moieties along with an aromatic heterocyclic group have been prepared by condensation of (*E*)-2-((4-chlorophenyl)azo)aniline or (*E*)-2-(phenylazo)aniline with 2-nitrosopyridine using the previously reported procedure.<sup>20</sup>

### Synthesis of complexes:

**[Zn( $L^{Cl}$ )Cl<sub>2</sub>] 1a** Anhydrous ZnCl<sub>2</sub> (136 mg, 1.00 mmol) was added to a solution of ( $L^{Cl}$ ) (354 mg, 1.10 mmol) in ethanol (25 mL) under open air. The reaction mixture was stirred at room temperature for 6 hrs. The solvent was removed under reduced pressure. Slow diffusion of the dichloromethane solution of the complex into n-hexane led to the crystallisation of **1a** as rod-shaped crystals. Yield and characterization data: Blood-red crystal, Yield 90% (412 mg). Anal. Calcd. for C<sub>17</sub>H<sub>12</sub>N<sub>5</sub>Cl<sub>3</sub>Zn: C 44.58, H 2.64, N 15.29; Found C 44.98, H 2.69, N 15.16%. <sup>1</sup>H-NMR (400 MHz, DMSO-*d*<sub>6</sub>):  $\delta$  (ppm) 8.76 (d,  $J = 5.4$  Hz, 1H), 8.07 (t,  $J = 7.8$  Hz, 1H), 7.93-7.90 (m, 2H), 7.79-7.75 (m, 4H), 7.70-7.64 (m, 3H), 7.62-7.59 (m, 1H). <sup>13</sup>C-NMR (100 MHz, DMSO-*d*<sub>6</sub>):

$\delta$  (ppm) 163.3, 151.3, 150.0, 149.9, 147.8, 147.4, 137.0, 132.9, 132.3, 130.2, 126.6, 125.0, 124.9, 119.4, 119.0, 113.5. FT-IR ( $\text{cm}^{-1}$ ): 1459, 1390 ( $\nu_{\text{N}=\text{N}}$ ).

**[Zn(L<sup>H</sup>)Cl<sub>2</sub>] 1b** The former procedure has been applied with same stoichiometrically amount to synthesised complex **1b**. Yield and characterization data: Blood-red crystal, Yield 85% (360 mg). Anal. Calcd. for C<sub>17</sub>H<sub>13</sub>N<sub>5</sub>Cl<sub>2</sub>Zn: C 48.20, H 3.09, N 16.53; Found C 48.61, H 3.13, N 16.41%. <sup>1</sup>H-NMR (400 MHz, DMSO-*d*<sub>6</sub>):  $\delta$  (ppm) 8.75 (d,  $J = 5.4$  Hz, 1H), 8.06 (t,  $J = 7.8$  Hz, 1H), 7.90 (d,  $J = 7.7$  Hz, 2H), 7.79-7.74 (m, 4H), 7.68 (d,  $J = 8.1$  Hz, 1H), 7.62-7.59 (m, 4H). <sup>13</sup>C-NMR (100 MHz, DMSO-*d*<sub>6</sub>):  $\delta$  (ppm) 163.4, 152.8, 149.9, 148.0, 147.4, 139.5, 132.8, 132.5, 131.9, 130.0, 129.1, 128.7, 126.6, 123.3, 119.5, 118.8, 113.4. FT-IR ( $\text{cm}^{-1}$ ): 1456, 1397 ( $\nu_{\text{N}=\text{N}}$ ).

## NMR Spectrum of Complexes

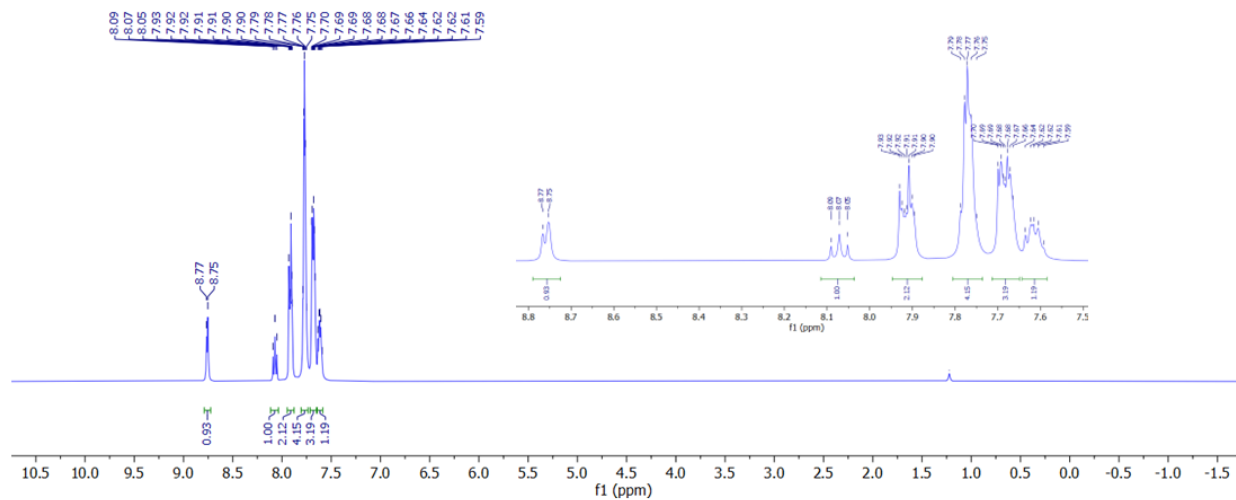

**Fig. S1** <sup>1</sup>H NMR spectrum of complex **1a** (400 MHz, DMSO-*d*<sub>6</sub>).

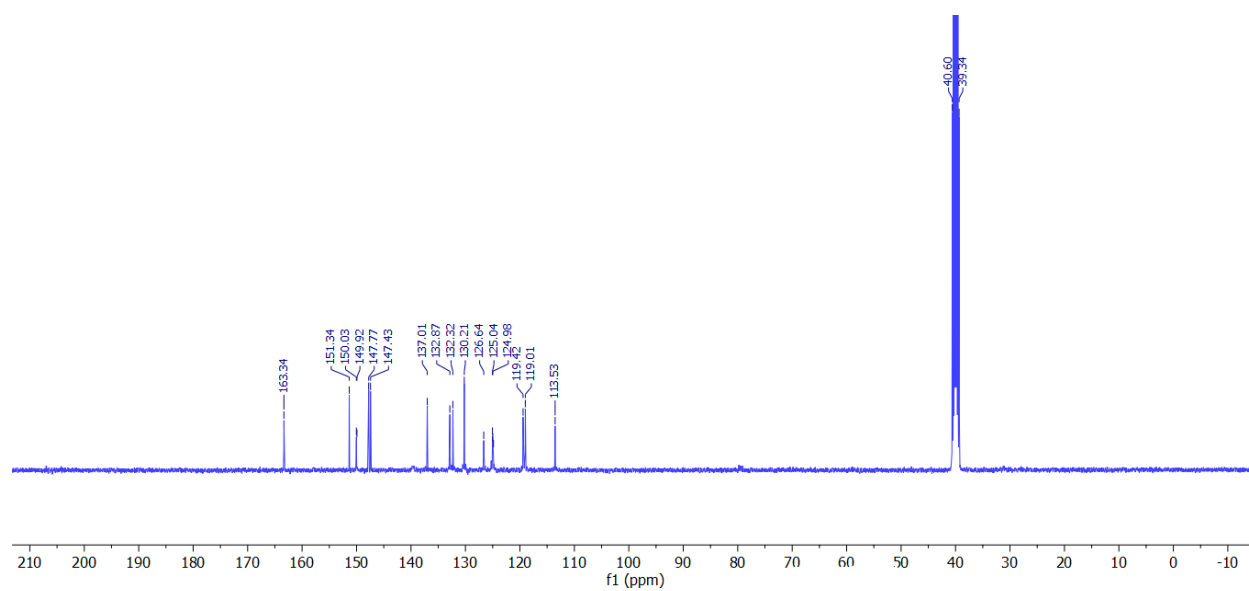

**Fig. S2** <sup>13</sup>C NMR spectrum of complex **1a** (101 MHz, DMSO-*d*<sub>6</sub>).



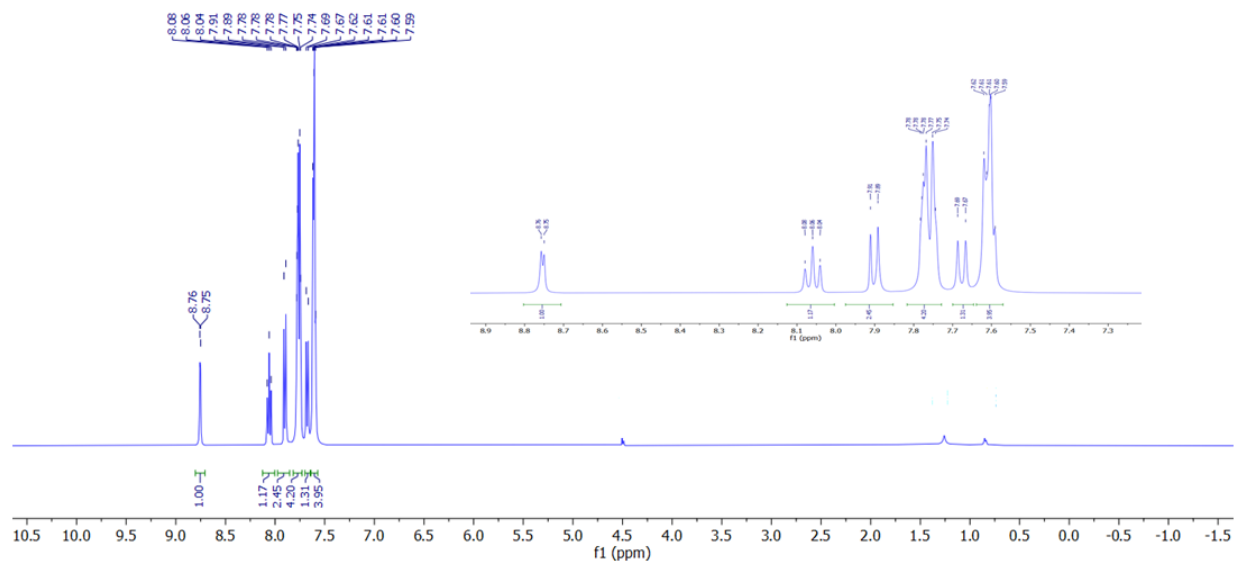

**Fig. S3**  $^1\text{H}$  NMR spectrum of complex **1b** (400 MHz,  $\text{DMSO-}d_6$ ).

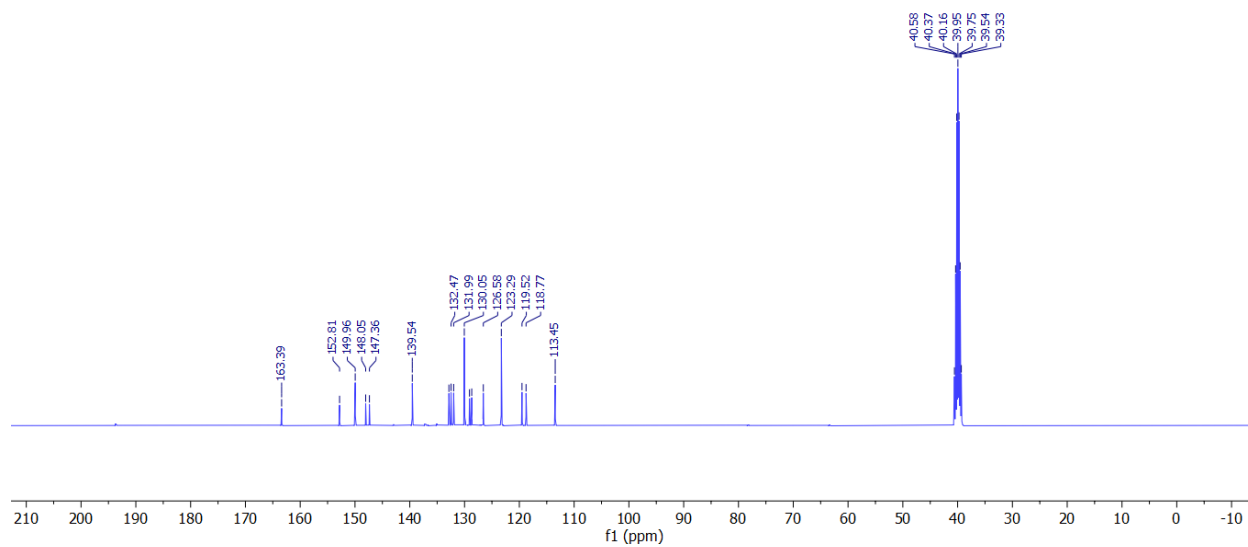

**Fig. S4**  $^{13}\text{C}$  NMR spectrum of complex **1b** (101 MHz,  $\text{DMSO-}d_6$ ).

**Table S3.** Frontier Molecular Orbital Composition (%) in the Ground State for **1a** complex.

| Orbital | MO   | Energy (eV) | Composition |       |       |    |    |    | Contribution               |
|---------|------|-------------|-------------|-------|-------|----|----|----|----------------------------|
|         |      |             | Zn          | Azo 1 | Azo 2 | Cl | Py | Ph |                            |
| 112     | L+5  | -0.80       | 0           | 0     | 4     | 0  | 3  | 93 | $\pi^*$ (Ph)               |
| 111     | L+4  | -0.82       | 0           | 0     | 5     | 0  | 2  | 93 | $\pi^*$ (Ph)               |
| 110     | L+3  | -1.27       | 0           | 5     | 1     | 0  | 55 | 39 | $\pi^*$ (Py + Ph)          |
| 109     | L+2  | -2.01       | 0           | 2     | 0     | 0  | 94 | 4  | $\pi^*$ (Py)               |
| 108     | L+1  | -3.05       | 1           | 4     | 46    | 1  | 3  | 45 | $\pi^*$ (Azo + Ph)         |
| 107     | LUMO | -3.99       | 0           | 44    | 5     | 1  | 25 | 24 | $\pi^*$ (Azo +Py +Ph)      |
| 106     | HOMO | -6.54       | 1           | 1     | 22    | 31 | 1  | 43 | lp (Azo) + $\pi$ (Cl + Ph) |
| 105     | H-1  | -6.67       | 1           | 0     | 1     | 95 | 0  | 3  | $\pi$ (Cl + Ph)            |
| 104     | H-2  | -6.73       | 1           | 0     | 1     | 93 | 1  | 4  | $\pi$ (Cl)                 |
| 103     | H-3  | -6.78       | 5           | 1     | 0     | 90 | 2  | 3  | $\pi$ (Cl)                 |
| 102     | H-4  | -6.90       | 9           | 0     | 4     | 63 | 0  | 24 | $\pi$ (Cl + Ph + Py + Azo) |
| 101     | H-5  | -7.39       | 3           | 8     | 38    | 20 | 3  | 28 | $\pi$ (Azo + Ph + Cl)      |

**Table S4.** Frontier Molecular Orbital Composition (%) in the Ground State for **1b** complex.

| Orbital | MO   | Energy (eV) | Composition |       |       |    |    |    | Contribution               |
|---------|------|-------------|-------------|-------|-------|----|----|----|----------------------------|
|         |      |             | Zn          | Azo 1 | Azo 2 | Cl | Py | Ph |                            |
| 104     | L+5  | -0.54       | 0           | 0     | 3     | 0  | 0  | 97 | $\pi^*$ (Ph)               |
| 103     | L+4  | -0.67       | 0           | 1     | 7     | 0  | 5  | 87 | $\pi^*$ (Ph)               |
| 102     | L+3  | -1.14       | 0           | 4     | 1     | 0  | 55 | 39 | $\pi^*$ (Py + Ph + Azo)    |
| 101     | L+2  | -1.82       | 0           | 1     | 0     | 0  | 94 | 4  | $\pi^*$ (Py)               |
| 100     | L+1  | -2.97       | 1           | 5     | 45    | 1  | 3  | 45 | $\pi^*$ (Azo + Ph)         |
| 99      | LUMO | -3.85       | 0           | 44    | 6     | 1  | 24 | 25 | $\pi^*$ (Azo +Py +Ph)      |
| 98      | HOMO | -6.53       | 2           | 1     | 19    | 44 | 1  | 32 | lp (Azo) + $\pi$ (Cl + Ph) |
| 97      | H-1  | -6.67       | 2           | 0     | 4     | 88 | 1  | 5  | $\pi$ (Cl)                 |
| 96      | H-2  | -6.73       | 1           | 0     | 4     | 85 | 1  | 10 | $\pi$ (Cl)                 |

|    |     |       |   |   |   |    |   |    |                       |
|----|-----|-------|---|---|---|----|---|----|-----------------------|
| 95 | H-3 | -6.79 | 3 | 1 | 0 | 90 | 2 | 4  | $\pi$ (Cl)            |
| 94 | H-4 | -6.91 | 9 | 1 | 6 | 58 | 1 | 26 | $\pi$ (Cl + Ph + Azo) |
| 93 | H-5 | -7.24 | 1 | 2 | 1 | 8  | 0 | 88 | $\pi$ (Ph + Cl)       |

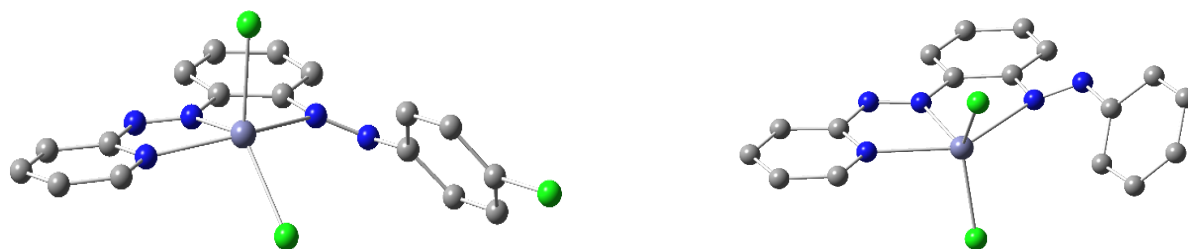

**Fig. S5** Solvent phase optimised geometry of **1a** (left) and **1b** (right) complex (H's are omitted for clarity) calculated at B3LYP/6-311+G(d,p) level of theory.

**Table S5.** Main Optical Transition at the TD-DFT/B3LYP/6-31+G(d,p) Level for the complex **1a** with composition in terms of Molecular Orbital Contribution of the Transition, Computed Vertical Excitation Energies, and Oscillator Strength in Dichloromethane.

| Transition               | CI                 | Composition                                                  | E (eV)  | Oscillator Strength ( <i>f</i> ) | $\lambda_{\text{theo}}$ (nm) |
|--------------------------|--------------------|--------------------------------------------------------------|---------|----------------------------------|------------------------------|
| $S_0 \rightarrow S_1$    | 0.63460            | HOMO $\rightarrow$ LUMO (81%)                                | 2.23654 | 0.1586                           | 554.39                       |
| $S_0 \rightarrow S_3$    | 0.51482            | HOMO $\rightarrow$ L+1 (53%)                                 | 2.7684  | 0.0243                           | 447.86                       |
| $S_0 \rightarrow S_7$    | 0.55532<br>0.32956 | H-5 $\rightarrow$ LUMO (62%)<br>H-4 $\rightarrow$ LUMO (22%) | 3.0766  | 0.1091                           | 402.99                       |
| $S_0 \rightarrow S_8$    | 0.42948<br>0.40887 | H-2 $\rightarrow$ LUMO (37%)<br>H-3 $\rightarrow$ LUMO (33%) | 3.1584  | 0.4438                           | 392.56                       |
| $S_0 \rightarrow S_{12}$ | 0.42254<br>0.35229 | H-1 $\rightarrow$ L+1 (36%)<br>H-2 $\rightarrow$ L+1 (25%)   | 3.6283  | 0.3418                           | 341.71                       |

|                          |                     |                                                              |        |        |        |
|--------------------------|---------------------|--------------------------------------------------------------|--------|--------|--------|
| $S_0 \rightarrow S_{14}$ | 0.48405<br>0.38441  | H-1 $\rightarrow$ L+1 (47%)<br>H-3 $\rightarrow$ L+1 (30%)   | 3.7226 | 0.1571 | 333.05 |
| $S_0 \rightarrow S_{15}$ | 0.67201             | H-4 $\rightarrow$ L+1 (90%)                                  | 3.7960 | 0.0121 | 326.62 |
| $S_0 \rightarrow S_{17}$ | 0.66652             | H-5 $\rightarrow$ L+1 (89%)                                  | 3.8345 | 0.0315 | 323.34 |
| $S_0 \rightarrow S_{30}$ | 0.52252<br>0.27871  | HOMO $\rightarrow$ L+4 (55%)<br>HOMO $\rightarrow$ L+3 (16%) | 5.0444 | 0.0282 | 245.79 |
| $S_0 \rightarrow S_{38}$ | 0.50026<br>-0.43140 | H-5 $\rightarrow$ L+2 (50%)<br>H-2 $\rightarrow$ L+2 (37%)   | 5.2230 | 0.0294 | 237.38 |
| $S_0 \rightarrow S_{41}$ | 0.61394             | HOMO $\rightarrow$ L+5 (75%)                                 | 5.3973 | 0.0176 | 229.72 |

**Table S6.** Main Optical Transition at the TD-DFT/B3LYP/6-31+G(d,p) Level for the complex **1b** with composition in terms of Molecular Orbital Contribution of the Transition, Computed Vertical Excitation Energies, and Oscillator Strength in Dichloromethane.

| <b>Transition</b>        | <b>CI</b>           | <b>Composition</b>                                          | <b>E<br/>(eV)</b> | <b>Oscillator<br/>Strength (<i>f</i>)</b> | <b><math>\lambda_{\text{theo}}</math><br/>(nm)</b> |
|--------------------------|---------------------|-------------------------------------------------------------|-------------------|-------------------------------------------|----------------------------------------------------|
| $S_0 \rightarrow S_1$    | 0.61198             | HOMO $\rightarrow$ LUMO (75%)                               | 2.3093            | 0.1272                                    | 536.90                                             |
| $S_0 \rightarrow S_3$    | 0.48488             | HOMO $\rightarrow$ L+1 (47%)                                | 2.8147            | 0.0180                                    | 440.49                                             |
| $S_0 \rightarrow S_6$    | 0.64522             | H-4 $\rightarrow$ LUMO (83%)                                | 3.1318            | 0.0125                                    | 395.88                                             |
| $S_0 \rightarrow S_{11}$ | 0.56551             | H-1 $\rightarrow$ L+1 (64%)                                 | 3.6127            | 0.1311                                    | 343.19                                             |
| $S_0 \rightarrow S_{12}$ | 0.49452<br>-0.31640 | H-2 $\rightarrow$ L+1 (49%)<br>H-1 $\rightarrow$ L+1 (20%)  | 3.6914            | 0.3604                                    | 335.87                                             |
| $S_0 \rightarrow S_{26}$ | 0.65379             | HOMO $\rightarrow$ L+2 (85%)                                | 4.7083            | 0.0162                                    | 263.33                                             |
| $S_0 \rightarrow S_{35}$ | 0.49423<br>0.39368  | HOMO $\rightarrow$ L+4 (49%)<br>H-4 $\rightarrow$ L+2 (31%) | 5.3128            | 0.0216                                    | 233.37                                             |

**Table S7.** Natural transition orbitals (NTOs) for complex **1a** illustrating the nature of singlet excited states in the absorption bands in the range 200–700 nm. For each state, the respective number of the state, transition energy (eV), and the oscillator strength (in parentheses) are listed. Shown are only occupied (holes) and unoccupied (electrons) NTO pairs that contribute more than 15% to each excited state.

| Wavelength | Transition                                  | Hole                                                                                 | electron                                                                              |
|------------|---------------------------------------------|--------------------------------------------------------------------------------------|---------------------------------------------------------------------------------------|
| 500 nm     | S1<br>w = 0.8055<br>f = 0.1586<br>554.39 nm | 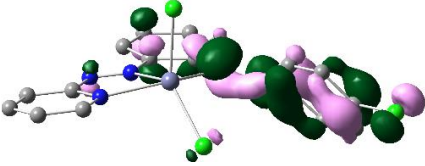   |    |
|            | S3<br>w = 0.5300<br>f = 0.0243<br>447.86 nm |   |   |
| 360 nm     | S7<br>w = 0.6167<br>f = 0.1091<br>402.99 nm |  |  |
|            | S7<br>w = 0.2172<br>f = 0.1091<br>402.99 nm |  |  |

|        |                                                                                           |                                                                                      |                                                                                       |
|--------|-------------------------------------------------------------------------------------------|--------------------------------------------------------------------------------------|---------------------------------------------------------------------------------------|
|        | <p>S8</p> <p><math>w = 0.3689</math></p> <p><math>f = 0.4438</math></p> <p>392.56 nm</p>  | 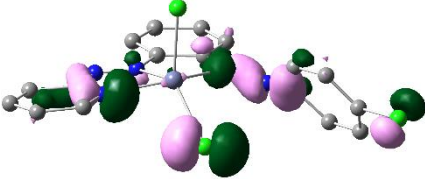   |    |
|        | <p>S8</p> <p><math>w = 0.3343</math></p> <p><math>f = 0.4438</math></p> <p>392.56 nm</p>  |    |    |
| 333 nm | <p>S12</p> <p><math>w = 0.3570</math></p> <p><math>f = 0.1571</math></p> <p>341.71 nm</p> |   |   |
|        | <p>S14</p> <p><math>w = 0.4686</math></p> <p><math>f = 0.1571</math></p> <p>333.05 nm</p> |  |  |
|        | <p>S14</p> <p><math>w = 0.2955</math></p> <p><math>f = 0.1571</math></p> <p>333.05 nm</p> |  |  |

|        |                                                                                           |                                                                                      |                                                                                       |
|--------|-------------------------------------------------------------------------------------------|--------------------------------------------------------------------------------------|---------------------------------------------------------------------------------------|
|        | <p>S15</p> <p><math>w = 0.9031</math></p> <p><math>f = 0.0121</math></p> <p>326.62 nm</p> | 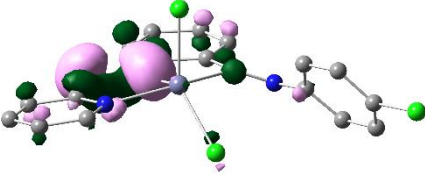   |    |
|        | <p>S17</p> <p><math>w = 0.8885</math></p> <p><math>f = 0.0315</math></p> <p>323.34 nm</p> |    |    |
| 236 nm | <p>S30</p> <p><math>w = 0.5460</math></p> <p><math>f = 0.0282</math></p> <p>245.79 nm</p> |   |   |
|        | <p>S30</p> <p><math>w = 0.1553</math></p> <p><math>f = 0.0282</math></p> <p>245.79 nm</p> |  |  |
|        | <p>S38</p> <p><math>w = 0.5005</math></p> <p><math>f = 0.0294</math></p> <p>237.38 nm</p> |  |  |

|  |                                                                 |                                                                                    |                                                                                     |
|--|-----------------------------------------------------------------|------------------------------------------------------------------------------------|-------------------------------------------------------------------------------------|
|  | <p>S38</p> <p>w = 0.3722</p> <p>f = 0.0294</p> <p>237.38 nm</p> | 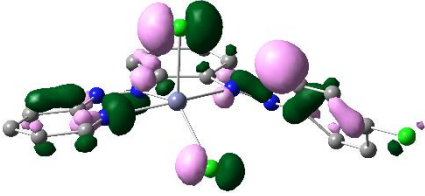 |  |
|--|-----------------------------------------------------------------|------------------------------------------------------------------------------------|-------------------------------------------------------------------------------------|

**Table S8.** Natural transition orbitals (NTOs) for complex **1b** illustrating the nature of singlet excited states in the absorption bands in the range 200–700 nm. For each state, the respective number of the state, transition energy (eV), and the oscillator strength (in parentheses) are listed. Shown are only occupied (holes) and unoccupied (electrons) NTO pairs that contribute more than 15% to each excited state.

| Wavelength | Transition                                                     | Hole                                                                                | Electron                                                                              |
|------------|----------------------------------------------------------------|-------------------------------------------------------------------------------------|---------------------------------------------------------------------------------------|
| 499 nm     | <p>S1</p> <p>w = 0.7490</p> <p>f = 0.1272</p> <p>536.90 nm</p> | 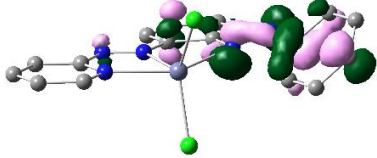 |  |
|            | <p>S3</p> <p>w = 0.4702</p> <p>f = 0.0180</p> <p>440.49 nm</p> |  |  |



|        |                                                                                           |                                                                                     |                                                                                       |
|--------|-------------------------------------------------------------------------------------------|-------------------------------------------------------------------------------------|---------------------------------------------------------------------------------------|
| 365 nm | <p>S6</p> <p><math>w = 0.8326</math></p> <p><math>f = 0.0125</math></p> <p>395.88 nm</p>  | 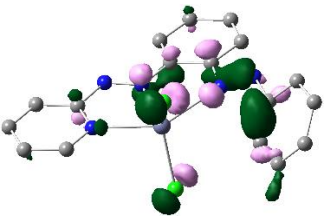   |    |
|        | <p>S11</p> <p><math>w = 0.6396</math></p> <p><math>f = 0.1311</math></p> <p>343.19 nm</p> |    |    |
| 335 nm | <p>S12</p> <p><math>w = 0.4891</math></p> <p><math>f = 0.3604</math></p> <p>335.87 nm</p> |  |  |
|        | <p>S12</p> <p><math>w = 0.2002</math></p> <p><math>f = 0.3604</math></p> <p>335.87 nm</p> |  |  |
| 235 nm | <p>S26</p> <p><math>w = 0.8548</math></p> <p><math>f = 0.0162</math></p> <p>263.33 nm</p> |  |  |

|  |                                                                                           |                                                                                   |                                                                                     |
|--|-------------------------------------------------------------------------------------------|-----------------------------------------------------------------------------------|-------------------------------------------------------------------------------------|
|  | <p>S35</p> <p><math>w = 0.4885</math></p> <p><math>f = 0.0216</math></p> <p>233.37 nm</p> | 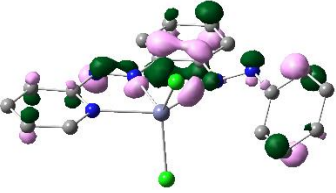 |  |
|  | <p>S35</p> <p><math>w = 0.3099</math></p> <p><math>f = 0.0216</math></p> <p>233.37 nm</p> |  |  |

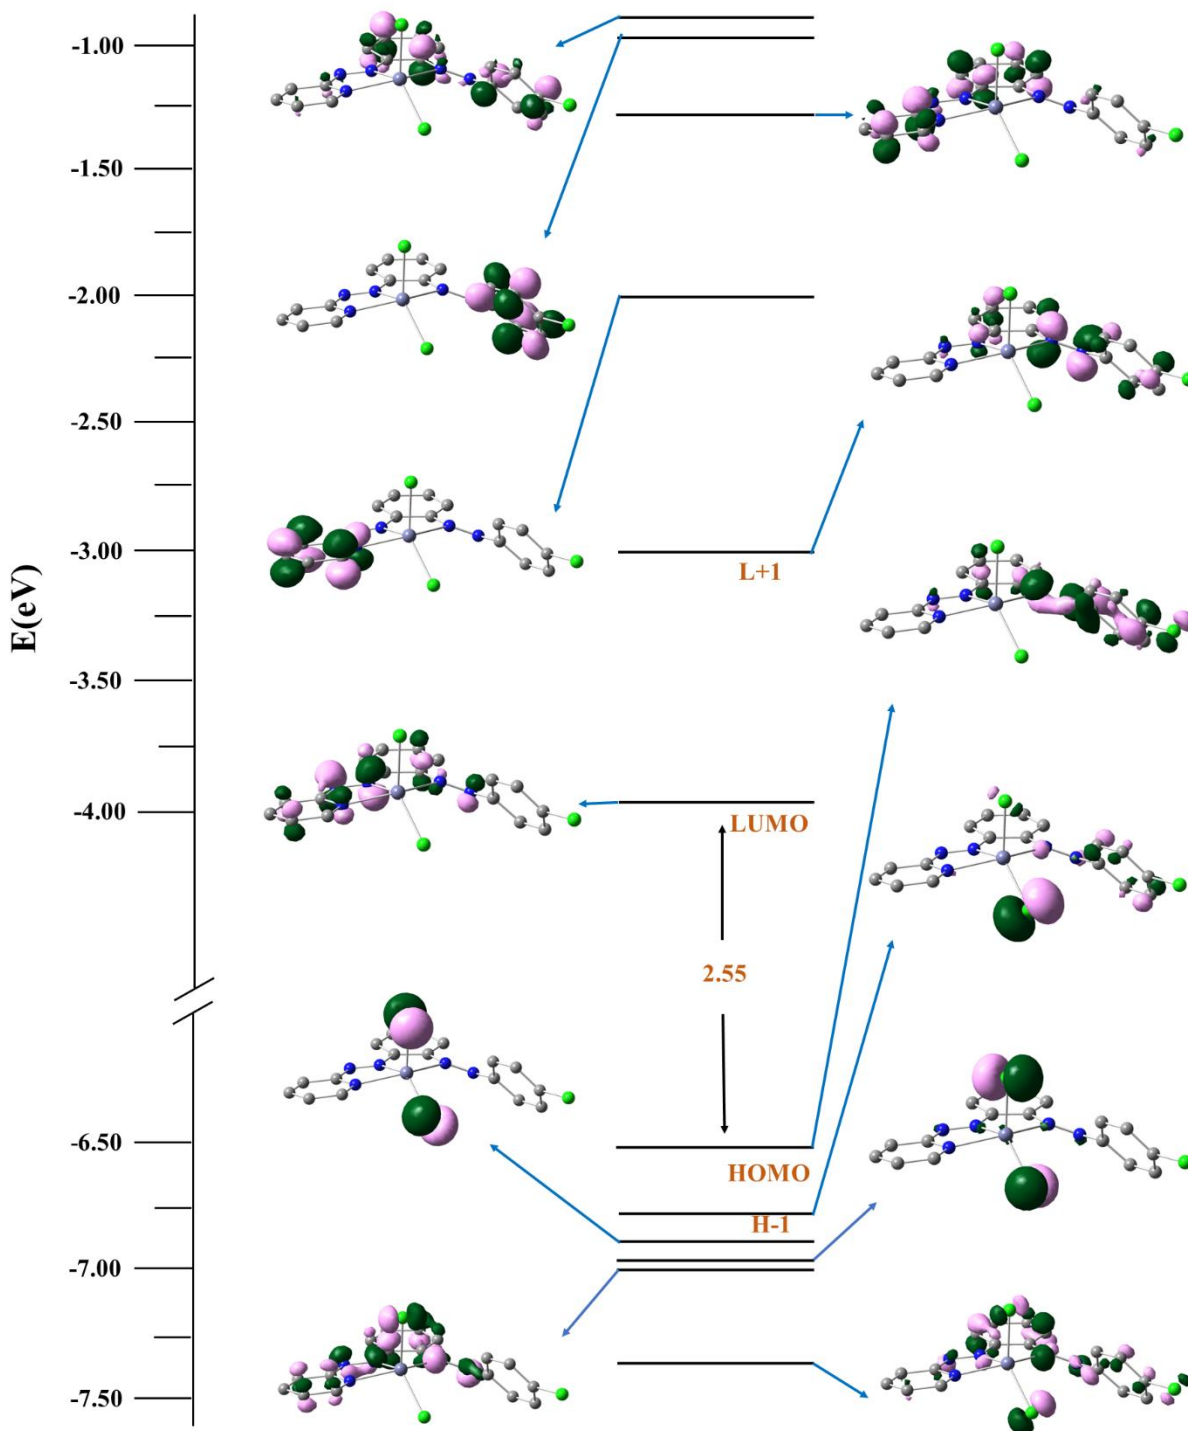

**Fig. S6** Partial MO diagram and isodensity surface plots (isovalued = 0.06) for selected FMOs of the **1a** complex. The arrows are used to highlight the HOMO–LUMO energy gaps. All the DFT energy values are given in eV.

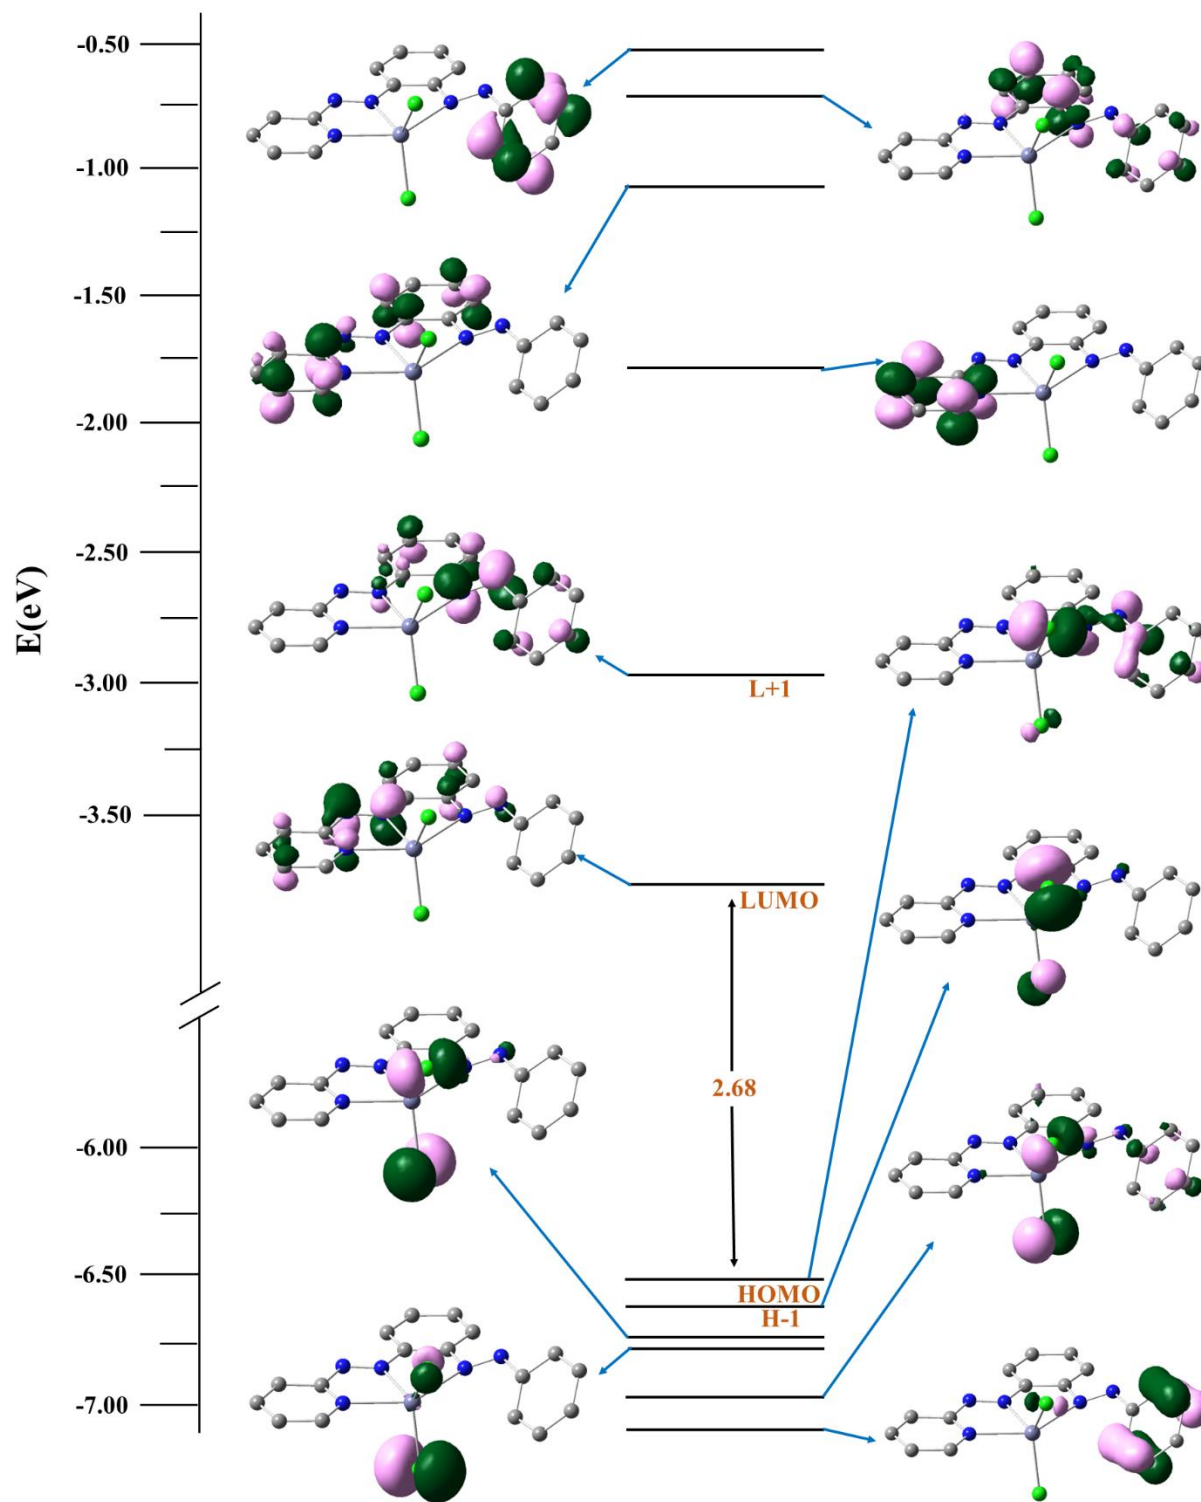

**Fig. S7** Partial MO diagram and isodensity surface plots (isovalue = 0.06) for selected FMOs of the **1b** complex. The arrows are used to highlight the HOMO-LUMO energy gaps. All the DFT energy values are given in eV.

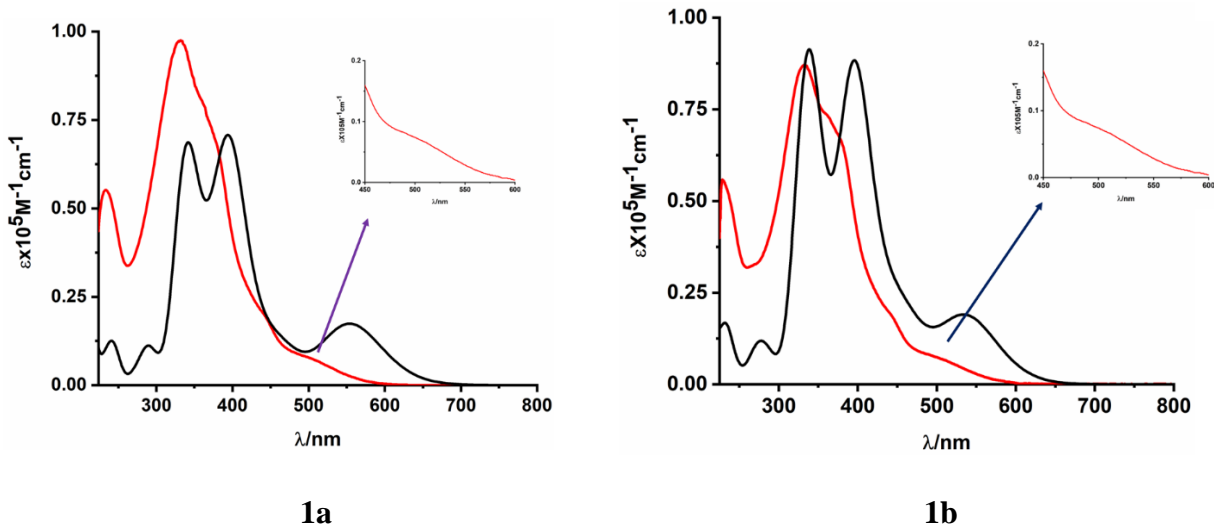

**Fig. S8** Experimental (red) and theoretical (black) absorption spectrum of **1a**(left) & **1b**(right) complex in CH<sub>2</sub>Cl<sub>2</sub> solution at 298 K.

**Table S9.** Coordinates of Optimised structure of complex **1a**.

| Tag | Symbol | X          | Y          | Z          |
|-----|--------|------------|------------|------------|
| 1   | Zn     | 8.195225   | 9.3534933  | 6.8816697  |
| 2   | Cl     | 10.5395086 | 9.3140769  | 6.7379555  |
| 3   | Cl     | 6.7964702  | 9.4627584  | 8.7729097  |
| 4   | Cl     | 8.5346613  | 5.3713459  | 12.8137888 |
| 5   | N      | 7.5781739  | 9.0897911  | 4.7398266  |
| 6   | N      | 7.3755557  | 10.1081465 | 4.0244872  |
| 7   | N      | 7.7969172  | 11.3645132 | 6.0095758  |
| 8   | N      | 7.7661971  | 6.8559533  | 6.3337638  |
| 9   | N      | 7.3599379  | 5.878426   | 7.0228991  |
| 10  | C      | 7.4901647  | 7.8375653  | 4.1101687  |
| 11  | C      | 6.8133036  | 5.0961576  | 9.1974576  |
| 12  | H      | 5.940998   | 4.6334343  | 8.7459912  |
| 13  | C      | 7.501684   | 11.3436185 | 4.6981732  |
| 14  | C      | 7.5572423  | 6.6888177  | 4.9389039  |
| 15  | C      | 7.330742   | 7.6948734  | 2.7190553  |
| 16  | H      | 7.2814801  | 8.5848944  | 2.103042   |
| 17  | C      | 7.6851666  | 5.8475035  | 8.3883322  |

|    |   |            |            |            |
|----|---|------------|------------|------------|
| 18 | C | 7.0535772  | 4.9687139  | 10.5620618 |
| 19 | H | 6.3714212  | 4.4110513  | 11.1946516 |
| 20 | C | 7.2441754  | 6.4294949  | 2.1549169  |
| 21 | H | 7.1281834  | 6.3237752  | 1.0805968  |
| 22 | C | 7.4789157  | 5.4165197  | 4.3482557  |
| 23 | H | 7.5609815  | 4.5408497  | 4.9813916  |
| 24 | C | 9.1085302  | 6.2623082  | 10.3027310 |
| 25 | H | 10.0084059 | 6.6830454  | 10.7388405 |
| 26 | C | 8.2036428  | 5.5535223  | 11.1011149 |
| 27 | C | 7.9042476  | 12.5445906 | 6.6251061  |
| 28 | H | 8.1378767  | 12.5168765 | 7.6851964  |
| 29 | C | 8.8467769  | 6.4155244  | 8.9451071  |
| 30 | H | 9.5559003  | 6.9397604  | 8.3137055  |
| 31 | C | 7.3047263  | 12.5031092 | 3.9450312  |
| 32 | H | 7.0676651  | 12.4223881 | 2.8899530  |
| 33 | C | 7.7294793  | 13.7600077 | 5.9508887  |
| 34 | H | 7.8311258  | 14.6949441 | 6.4913524  |
| 35 | C | 7.3188712  | 5.2886223  | 2.9723370  |
| 36 | H | 7.2645836  | 4.2989972  | 2.5283440  |
| 37 | C | 7.4259900  | 13.7363608 | 4.5898590  |
| 38 | H | 7.2846168  | 14.6598917 | 4.0373759  |

**Table S10.** Coordinates of Optimised structure of complex **1b**.

| Tag | Symbol | X         | Y          | Z         |
|-----|--------|-----------|------------|-----------|
| 1   | Zn     | 5.8497188 | 10.6952617 | 8.0950091 |
| 2   | N      | 5.4630069 | 12.9379152 | 8.2243246 |
| 3   | C      | 5.6604181 | 13.8404438 | 7.2637583 |
| 4   | H      | 5.9919415 | 13.4531045 | 6.3044442 |
| 5   | C      | 5.4518569 | 15.210381  | 7.4702044 |
| 6   | H      | 5.6275327 | 15.9118275 | 6.6609138 |
| 7   | C      | 5.0173749 | 15.6425416 | 8.7238049 |

|    |    |           |            |            |
|----|----|-----------|------------|------------|
| 8  | H  | 4.8460902 | 16.6975783 | 8.9172224  |
| 9  | C  | 4.8020651 | 14.6974959 | 9.7282816  |
| 10 | H  | 4.4599458 | 14.9700212 | 10.721001  |
| 11 | C  | 5.0400722 | 13.353528  | 9.4270628  |
| 12 | N  | 4.8060736 | 12.4087187 | 10.4547683 |
| 13 | N  | 5.0260824 | 11.2134739 | 10.1191645 |
| 14 | C  | 4.8302288 | 10.2211965 | 11.0907359 |
| 15 | C  | 4.4825731 | 10.5085388 | 12.4243122 |
| 16 | H  | 4.3654642 | 11.5446357 | 12.720157  |
| 17 | C  | 4.299952  | 9.4750911  | 13.3310387 |
| 18 | H  | 4.0379638 | 9.6977853  | 14.3614287 |
| 19 | C  | 4.4640754 | 8.1411123  | 12.9172608 |
| 20 | H  | 4.33138   | 7.3329533  | 13.6314688 |
| 21 | C  | 4.8088633 | 7.8452624  | 11.6038152 |
| 22 | H  | 4.952326  | 6.8213612  | 11.2791681 |
| 23 | C  | 4.9893165 | 8.8776197  | 10.6676221 |
| 24 | N  | 5.3818142 | 8.6282055  | 9.3253945  |
| 25 | N  | 5.1368713 | 7.4477     | 8.9428968  |
| 26 | C  | 5.6214787 | 7.037783   | 7.6952693  |
| 27 | C  | 4.945617  | 5.9401727  | 7.1271904  |
| 28 | H  | 4.0987793 | 5.5177564  | 7.6598718  |
| 29 | C  | 5.3505882 | 5.439488   | 5.893779   |
| 30 | H  | 4.8145361 | 4.6098317  | 5.4414059  |
| 31 | C  | 6.4589912 | 5.9999601  | 5.2464033  |
| 32 | H  | 6.7855757 | 5.6006153  | 4.2896422  |
| 33 | C  | 7.1589088 | 7.0616543  | 5.833783   |
| 34 | H  | 8.0301914 | 7.4811185  | 5.3389451  |
| 35 | C  | 6.7472981 | 7.5899617  | 7.0534580  |
| 36 | H  | 7.3126904 | 8.3912510  | 7.5187598  |
| 37 | Cl | 8.1421580 | 10.7701299 | 8.2514943  |
| 38 | Cl | 4.4420951 | 10.2952533 | 6.3421649  |

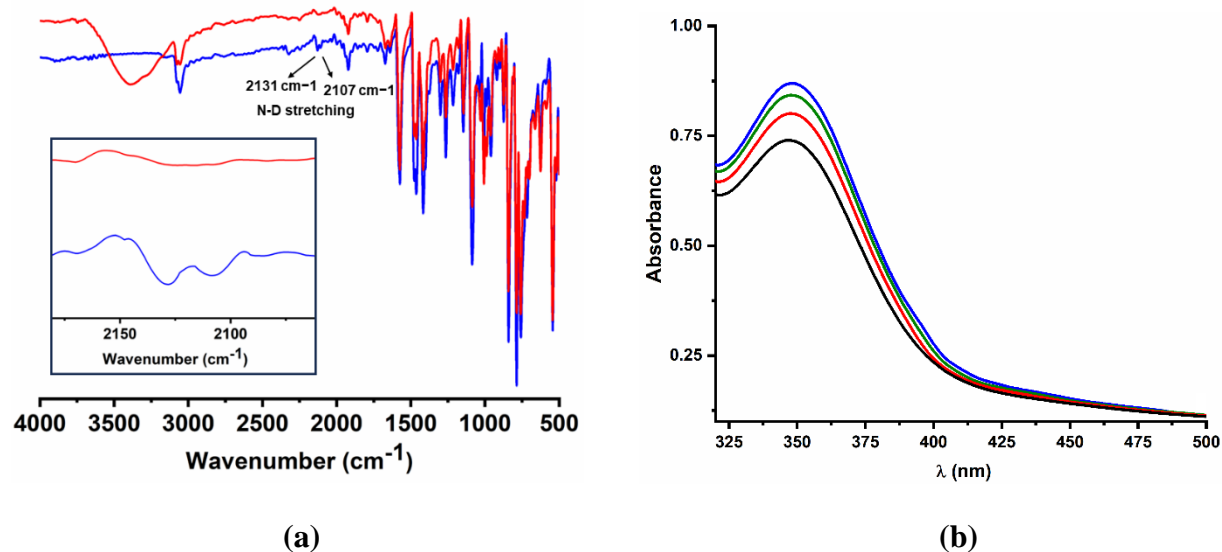

**Fig. S9** (a) IR spectrum of reaction mixture showing N-D stretching during dehydrogenation of non-deuterated 1-phenylethanol (red) and deuterated 1-phenylethanol (blue). (b) Electronic spectra of the formation of  $I_3^-$  ion in presence of  $H_2O_2$  (detection of  $H_2O_2$  was achieved as described in the text).

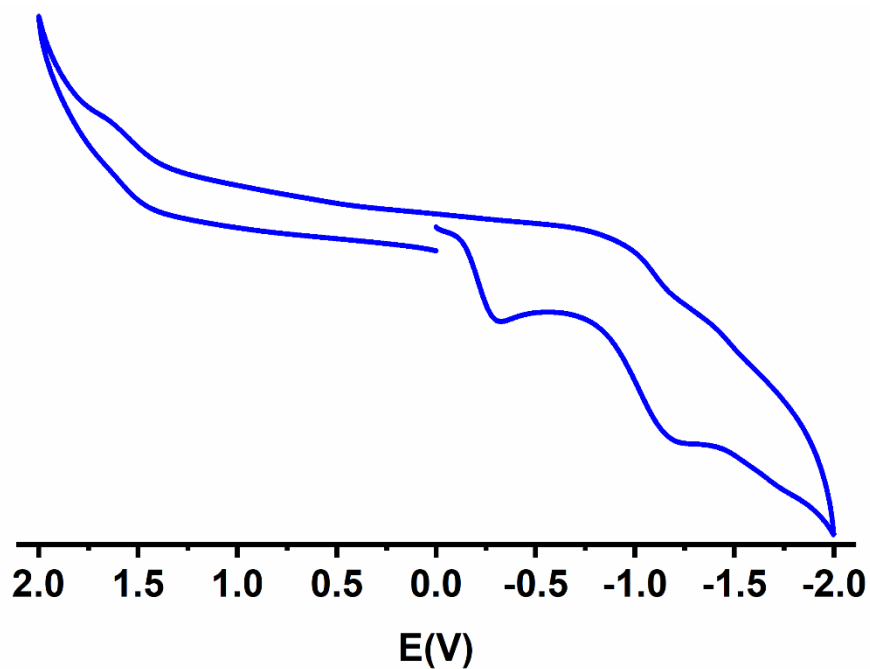

**Fig. S10** Cyclic voltammogram of **1a** in  $CH_3CN$  using 0.1 M  $Bu_4NPF_6$  using a Pt working electrode at  $50\text{ mV s}^{-1}$  with respect to Ag/AgCl reference electrode.



## X-Ray crystallographic information of 10aj and 5ag

The suitable crystals of all complexes were placed on Bruker D8 QUEST SC-XRD Diffractometer equipped with graphite monochromator (Mo K $\alpha$ ,  $\lambda = 0.71073 \text{ \AA}$ ) the crystals were kept at steady T= 273K during data collection. SAINT<sup>21</sup> crystallographic programme was utilized to integrate and scale the intensity data. SADABS<sup>22</sup> program was employed to process and rectify the integrated data. Data collection, reduction, absorption corrections were performed. The structure solution was carried out with SHELXT 2014/5<sup>23</sup> solution programme using iterative method and Olex2 1.5-dev<sup>24</sup> as the graphical user interface. The SHELXL 2018/3<sup>23</sup> programme was utilised to refine the model structure using full matrix least square minimisation on F<sup>2</sup>. Lastly, the consistency regarding thermal parameters, bond distances and estimated standard deviation (ESD) within respective atoms were accomplished using suitable commands in SHELXL programme. All non-hydrogen atoms were refined anisotropically. Riding model was applied to determine the position of H atoms geometrically and refined. ORTEP plot was used to draw the molecular structure using Olex2 1.5-dev as GUI. Crystallographic and refinement data of both complexes are given in Table S13. Additional refinement data can be found in CIF files.

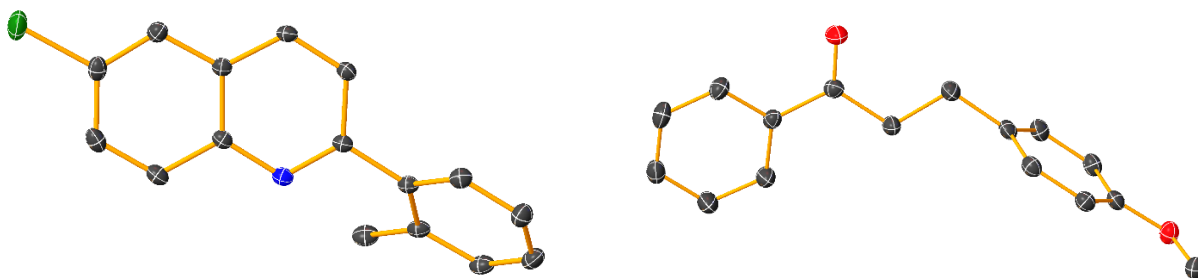

**Fig. S11** ORTEP view of **10aj** and **5ag** (hydrogen atoms are omitted for clarity, and thermal ellipsoids are set at 30% probability).

**Table S11.** Crystallographic Details of compound **10aj** and **5ag**.

|                                                                                                                                                                                                                                                                                                                                                                                                                                                                                                                                                                                                                                                              | <b>10aj</b>                                                    | <b>5ag</b>                                     |
|--------------------------------------------------------------------------------------------------------------------------------------------------------------------------------------------------------------------------------------------------------------------------------------------------------------------------------------------------------------------------------------------------------------------------------------------------------------------------------------------------------------------------------------------------------------------------------------------------------------------------------------------------------------|----------------------------------------------------------------|------------------------------------------------|
| Empirical formula                                                                                                                                                                                                                                                                                                                                                                                                                                                                                                                                                                                                                                            | C <sub>16</sub> H <sub>12</sub> N <sub>1</sub> Cl <sub>1</sub> | C <sub>16</sub> H <sub>16</sub> O <sub>2</sub> |
| <i>T</i> /K                                                                                                                                                                                                                                                                                                                                                                                                                                                                                                                                                                                                                                                  | 298K                                                           | 298K                                           |
| fw                                                                                                                                                                                                                                                                                                                                                                                                                                                                                                                                                                                                                                                           | 253.72                                                         | 240.30                                         |
| Crystal system                                                                                                                                                                                                                                                                                                                                                                                                                                                                                                                                                                                                                                               | orthorhombic                                                   | monoclinic                                     |
| Space Group                                                                                                                                                                                                                                                                                                                                                                                                                                                                                                                                                                                                                                                  | P 2c -2n                                                       | P 1 21/n 1                                     |
| <i>a</i> /Å                                                                                                                                                                                                                                                                                                                                                                                                                                                                                                                                                                                                                                                  | 7.6371(5)                                                      | 9.1890(14)                                     |
| <i>b</i> /Å                                                                                                                                                                                                                                                                                                                                                                                                                                                                                                                                                                                                                                                  | 12.4931(8)                                                     | 5.6168(9)                                      |
| <i>c</i> /Å                                                                                                                                                                                                                                                                                                                                                                                                                                                                                                                                                                                                                                                  | 13.4370(8)                                                     | 24.833(4)                                      |
| <i>α</i> /deg                                                                                                                                                                                                                                                                                                                                                                                                                                                                                                                                                                                                                                                | 90                                                             | 90                                             |
| <i>β</i> /deg                                                                                                                                                                                                                                                                                                                                                                                                                                                                                                                                                                                                                                                | 90                                                             | 90.297(6)                                      |
| <i>γ</i> /deg                                                                                                                                                                                                                                                                                                                                                                                                                                                                                                                                                                                                                                                | 90                                                             | 90                                             |
| <i>V</i> /Å <sup>3</sup>                                                                                                                                                                                                                                                                                                                                                                                                                                                                                                                                                                                                                                     | 1282.04(14)                                                    | 1281.7(3)                                      |
| <i>Z</i>                                                                                                                                                                                                                                                                                                                                                                                                                                                                                                                                                                                                                                                     | 4                                                              | 26                                             |
| D <sub>c</sub> /Mgm <sup>-3</sup>                                                                                                                                                                                                                                                                                                                                                                                                                                                                                                                                                                                                                            | 1.314                                                          | 1.245                                          |
| μ/mm <sup>-1</sup>                                                                                                                                                                                                                                                                                                                                                                                                                                                                                                                                                                                                                                           | 0.277                                                          | 0.081                                          |
| <i>F</i> (000)                                                                                                                                                                                                                                                                                                                                                                                                                                                                                                                                                                                                                                               | 528                                                            | 512                                            |
| cryst size/mm <sup>3</sup>                                                                                                                                                                                                                                                                                                                                                                                                                                                                                                                                                                                                                                   | 0.38 × 0.24 × 0.16                                             | 0.4 × 0.3 × 0.2                                |
| <i>θ</i> /deg                                                                                                                                                                                                                                                                                                                                                                                                                                                                                                                                                                                                                                                | 2.226 – 25.719                                                 | 2.359 – 28.481                                 |
| Measured reflns                                                                                                                                                                                                                                                                                                                                                                                                                                                                                                                                                                                                                                              | 9897                                                           | 6764                                           |
| <sup>a</sup> GOF on <i>F</i> <sup>2</sup>                                                                                                                                                                                                                                                                                                                                                                                                                                                                                                                                                                                                                    | 1.210                                                          | 1.034                                          |
| R1 <sup>b</sup> , wR2 <sup>c</sup> [ <i>I</i> > 2σ( <i>I</i> )]                                                                                                                                                                                                                                                                                                                                                                                                                                                                                                                                                                                              | 0.0496, 0.0976                                                 | 0.0543, 0.1323                                 |
| R1, wR2                                                                                                                                                                                                                                                                                                                                                                                                                                                                                                                                                                                                                                                      | 0.0578, 0.1013                                                 | 0.0710, 0.1479                                 |
| <sup>a</sup> GOF = {Σ[w( <i>F</i> <sub>o</sub> <sup>2</sup> - <i>F</i> <sub>c</sub> <sup>2</sup> )]/( <i>n</i> - <i>p</i> )} <sup>1/2</sup> . <sup>b</sup> R1 = Σ [  <i>F</i> <sub>o</sub>  - <i>F</i> <sub>c</sub> ] / Σ   <i>F</i> <sub>o</sub>  .<br><sup>c</sup> wR2 = [Σ [w( <i>F</i> <sub>o</sub> <sup>2</sup> - <i>F</i> <sub>c</sub> <sup>2</sup> ) <sup>2</sup> ]/ Σ [w( <i>F</i> <sub>o</sub> <sup>2</sup> ) <sup>2</sup> ] <sup>1/2</sup> where w = 1/[σ <sup>2</sup> ( <i>F</i> <sub>o</sub> <sup>2</sup> )+(a <i>P</i> ) <sup>2</sup> +b <i>P</i> ], <i>P</i> = ( <i>F</i> <sub>o</sub> <sup>2</sup> +2 <i>F</i> <sub>c</sub> <sup>2</sup> )/3. |                                                                |                                                |

**Table S12.** Optimization of the reaction conditions for the zinc catalyzed acceptorless mono- and double-dehydrogenative coupling of 2-aminobenzylalcohol (**6a**) with acetophenone (**3a**) and 1-phenylethanol (**4a**)<sup>a</sup>

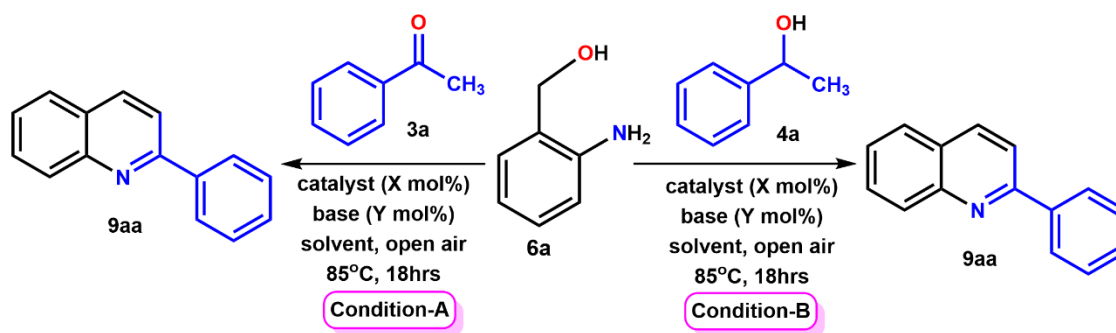

| Entry | Catalyst (X mol%)      | Solvent        | Base (Y mol%)                | Temp (°C) | Yield <sup>b,f</sup> (%) | Yield <sup>b,g</sup> (%) |
|-------|------------------------|----------------|------------------------------|-----------|--------------------------|--------------------------|
| 1     | <b>1a</b> (1.00 mol%)  | Toluene        | KO <sup>t</sup> Bu (100)     | 85        | 92                       | 90                       |
| 2     | <b>1a</b> (0.1 mol%)   | Toluene        | KO <sup>t</sup> Bu (100)     | 85        | 91                       | 90                       |
| 3     | <b>1a</b> (0.01 mol%)  | Toluene        | KO <sup>t</sup> Bu (100)     | 85        | 92                       | 91                       |
| 4     | <b>1a</b> (0.005 mol%) | Toluene        | KO <sup>t</sup> Bu (100)     | 85        | 92                       | 87                       |
| 5     | <b>1a</b> (0.001 mol%) | Toluene        | KO <sup>t</sup> Bu (100)     | 85        | 53                       | 47                       |
| 6     | <b>1a</b> (0.005 mol%) | Toluene        | KO <sup>t</sup> Bu (50)      | 85        | 92                       | 87                       |
| 7     | <b>1a</b> (0.005 mol%) | <b>Toluene</b> | <b>KO<sup>t</sup>Bu (20)</b> | <b>85</b> | <b>92</b>                | <b>60</b>                |
| 8     | <b>1a</b> (0.005 mol%) | <b>Toluene</b> | <b>KO<sup>t</sup>Bu (40)</b> | <b>85</b> | <b>92</b>                | <b>90</b>                |
| 9     | <b>1a</b> (0.005 mol%) | Toluene        | NaBH <sub>4</sub> (20)       | 85        | 74                       | 42                       |
| 10    | <b>1a</b> (0.005 mol%) | Toluene        | NaO <sup>t</sup> Bu (20)     | 85        | 85                       | 57                       |
| 11    | <b>1a</b> (0.005 mol%) | Toluene        | NaOH (20)                    | 85        | 90                       | 59                       |
| 12    | <b>1a</b> (0.005 mol%) | Toluene        | KOH (20)                     | 85        | 90                       | 57                       |

|                 |                                       |         |                                     |     |       |       |
|-----------------|---------------------------------------|---------|-------------------------------------|-----|-------|-------|
| 13              | <b>1a</b> (0.005 mol%)                | Toluene | K <sub>2</sub> CO <sub>3</sub> (20) | 85  | 52    | 19    |
| 14              | <b>1a</b> (0.005 mol%)                | Xylene  | KO <sup>t</sup> Bu (20)             | 85  | 82    | 55    |
| 15              | <b>1a</b> (0.005 mol%)                | THF     | KO <sup>t</sup> Bu (20)             | 85  | 45    | 23    |
| 16              | <b>1a</b> (0.005 mol%)                | EtOH    | KO <sup>t</sup> Bu (20)             | 85  | NR    | NR    |
| 17 <sup>c</sup> | <b>1a</b> (0.005 mol%)                | Toluene | KO <sup>t</sup> Bu (20)             | RT  | NR    | NR    |
| 18              | <b>1a</b> (0.005 mol%)                | Toluene | KO <sup>t</sup> Bu (20)             | 100 | 90    | 58    |
| 19              | ZnCl <sub>2</sub> + Ligand<br>(1:1)   | Toluene | KO <sup>t</sup> Bu (20)             | 85  | Trace | NR    |
| 20              | ZnCl <sub>2</sub> (0.005 & 1<br>mol%) | Toluene | KO <sup>t</sup> Bu (20)             | 85  | NR    | NR    |
| 21              | Ligand (1 mol%)                       | Toluene | KO <sup>t</sup> Bu (20)             | 85  | NR    | NR    |
| 22              |                                       | Toluene | KO <sup>t</sup> Bu (20)             | 85  | NR    | NR    |
| 23 <sup>d</sup> | <b>1a</b> (0.005 mol%)                | Toluene | KO <sup>t</sup> Bu (20)             | 85  | trace | trace |
| 24 <sup>e</sup> | <b>1a</b> (0.005 mol%)                | Toluene | KO <sup>t</sup> Bu (20)             | 85  | 68    | 37    |
| 25              | <b>1a</b> (0.005 mol%)                | Neat    | KO <sup>t</sup> Bu (20)             | 85  | 45    | trace |
| 26              | <b>1b</b> (0.005 mol%)                | Toluene | KO <sup>t</sup> Bu (20)             | 85  | 87    | 59    |

<sup>a</sup>Reaction Conditions: mono-dehydrogenation: condition **A**: 2-Amino benzyl alcohol **6a** (1.00 mmol), acetophenone **3a** (1.00 mmol). Double-dehydrogenation: condition **B**: 2-Amino benzyl alcohol **6a** (1.00 mmol), 1-phenylethanol **4a** (1.00 mmol), Base, 5.0 ml toluene, Reaction time 18 hrs, open air.

<sup>b</sup>Isolated yield after column chromatography.

<sup>c</sup>RT = Room Temperature.

<sup>d</sup>Under an argon atmosphere.

<sup>e</sup>Reaction time 6 hrs, NR = No Reaction.

<sup>f</sup>represents the yield of the mono-dehydrogenative coupling reaction.

<sup>g</sup>represents the yield of the double-dehydrogenative coupling reaction.

### General procedure for synthesis of $\alpha$ -alkylated ketone derivatives:

In aerial condition, a mixture of catalyst **1a** (0.008 mol%), KO<sup>t</sup>Bu (30 mol%), secondary alcohols/ketones (1.0 mmol), and primary alcohols (1.0 mmol) had been placed into a 50.0 ml round-bottom flask. The reaction mixture was then placed in a preheated oil bath at 110 °C prior 5.0 ml of toluene was added to it. The reaction was continuing for 21 hrs. Following the reaction, the resulting mixture was vacuum-concentrated and purified using column chromatography on silica gel 60-120 mesh (hexane/ethyl acetate) to afford the desired product.

### General procedure for Friedländer quinoline synthesis:

Catalyst **1a** (0.005 mol%), KO<sup>t</sup>Bu (20 mol%), secondary alcohols/ketones (1.0 mmol), and 2-aminobenzyl alcohol derivatives (1.0 mmol) were added to a 50.0 ml round-bottom flask under aerial condition. The reaction mixture was then placed in an oil bath that had been heated to 85 °C before 5.0 ml of toluene was added to it. The reaction continued for 18 hrs. The resulting mixture was subsequently concentrated under vacuum and purified using column chromatography on silica gel 60-120 mesh (hexane/ethyl acetate) to afford the desired product.

### Characterization data of Zn catalyzed compounds:

All the reactions were carried out in 1.0 mmol scale of reactant and according to the general procedure for synthesis of  $\alpha$ -alkylated ketone derivatives.

**1,3-diphenylpropan-1-one<sup>25</sup> (5aa):** Eluent: Hexane/Ethyl acetate (20:1). White solid (yield =

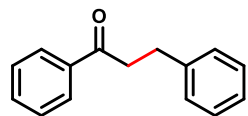

88%, 185mg). <sup>1</sup>H NMR (300 MHz, CDCl<sub>3</sub>):  $\delta$  (ppm) 8.00 (d,  $J = 7.4$  Hz, 2H) 7.59 (t,  $J = 7.3$  Hz, 1H), 7.49 (t,  $J = 7.5$  Hz, 2H), 7.37 – 7.22 (m, 5H), 3.34 (t,  $J = 7.7$  Hz, 2H), 3.11 (t,  $J = 7.7$  Hz, 2H). <sup>13</sup>C NMR (75 MHz, CDCl<sub>3</sub>):  $\delta$  (ppm)

199.3, 141.3, 136.9, 133.0, 128.6, 128.5, 128.4, 128.0, 126.2, 40.5, 30.1.

**1-phenyl-3-(p-tolyl)propan-1-one<sup>25</sup> (5ab):** Eluent: Hexane/Ethyl acetate (20:1). White solid

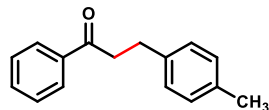

(yield = 76%, 170 mg). <sup>1</sup>H NMR (300 MHz, CDCl<sub>3</sub>):  $\delta$  (ppm) 8.09 – 8.05 (m, 2H), 7.64 – 7.60 (m, 1H), 7.56 – 7.52 (m, 2H), 7.29 – 7.25 (m, 4H), 3.37 – 3.31 (m, 2H), 3.19 – 3.14 (m, 2H), 2.45 (s, 3H). <sup>13</sup>C NMR (75 MHz, CDCl<sub>3</sub>):  $\delta$  (ppm) 198.9,

143.9, 141.4, 134.4, 129.3, 128.5, 128.4, 128.2, 126.1, 40.4, 30.2, 21.7.

**1-phenyl-3-(m-tolyl)propan-1-one<sup>25</sup> (5ac):** Eluent: Hexane/Ethyl acetate (20:1). White solid

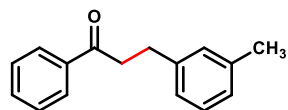

(yield = 72%, 161 mg). <sup>1</sup>H NMR (300 MHz, CDCl<sub>3</sub>): δ (ppm) 7.99 (d, *J* = 8.6 Hz, 2H), 7.61- 7.56 (m, 1H), 7.51-7.45 (m, 2H), 7.22 (t, *J* = 7.1 Hz, 1H), 7.11-7.04 (m, 3H), 3.32 (dd, *J* = 8.5, 6.4 Hz, 2H), 3.09-3.03 (m, 2H), 2.36 (s, 3H). <sup>13</sup>C NMR (75 MHz, CDCl<sub>3</sub>): δ (ppm) 199.4, 141.2, 138.1, 136.9, 133.0, 129.2, 128.6, 128.1, 126.9, 125.4, 40.6, 30.1, 21.4.

**1-phenyl-3-(o-tolyl)propan-1-one<sup>25</sup> (5ad):** Eluent: Hexane/Ethyl acetate (20:1). White solid

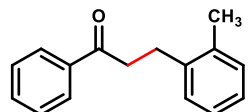

(yield = 69%, 155 mg). <sup>1</sup>H NMR (300 MHz, CDCl<sub>3</sub>): δ (ppm) 8.01- 7.98 (m, 2H), 7.62-7.57 (m, 1H), 7.51-7.45 (m, 2H), 7.21-7.16 (m, 4H), 3.31-3.26 (m, 2H), 3.11-3.06 (m, 2H), 2.38 (s, 3H). <sup>13</sup>C NMR (75 MHz, CDCl<sub>3</sub>): δ (ppm) 199.4, 139.5, 136.9, 136.0, 133.2, 130.5, 129.4, 128.9, 128.7, 128.2, 126.4 (d, *J* = 10.4 Hz), 39.2, 27.6, 19.5.

**3-(4-chlorophenyl)-1-phenylpropan-1-one<sup>25</sup> (5ae):** Eluent: Hexane/Ethyl acetate (20:1). White

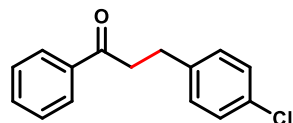

solid (yield = 78%, 191 mg). <sup>1</sup>H NMR (300 MHz, CDCl<sub>3</sub>): δ (ppm) 7.99- 7.96 (m, 2H), 7.60-7.56 (m, 1H), 7.51-7.48 (m, 2H), 7.28-7.20 (m, 4H), 3.33-3.28 (m, 2H), 3.09-3.04 (m, 2H). <sup>13</sup>C NMR (75 MHz, CDCl<sub>3</sub>): δ (ppm) 198.9, 139.8, 136.8, 133.2, 131.9, 129.8, 128.7, 128.6, 128.0, 40.1, 29.4.

**3-(4-fluorophenyl)-1-phenylpropan-1-one<sup>25</sup> (5af):** Eluent: Hexane/Ethyl acetate (20:1). White

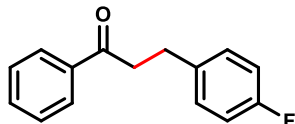

solid (yield = 85%, 194 mg). <sup>1</sup>H NMR (300 MHz, CDCl<sub>3</sub>): δ (ppm) 7.99- 7.96 (m, 2H), 7.61-7.56 (m, 1H), 7.50-7.45 (m, 2H), 7.25-7.21 (m, 2H), 7.03-6.97 (m, 2H), 3.31 (t, *J* = 7.5 Hz, 2H), 3.07 (t, *J* = 7.5 Hz, 2H). <sup>13</sup>C NMR (75 MHz, CDCl<sub>3</sub>): δ (ppm) 199.0, 163.0, 159.8, 136.8, 133.1, 129.9, 129.8, 128.6, 128.0, 115.4, 115.1, 40.4, 29.3. <sup>19</sup>F NMR (282 MHz, CDCl<sub>3</sub>): δ = -117.3 (s, 1F).

**3-(4-methoxyphenyl)-1-phenylpropan-1-one<sup>25</sup> (5ag):** Eluent: Hexane/Ethyl acetate (20:1).

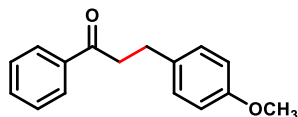

White solid (yield = 82%, 197mg). <sup>1</sup>H NMR (300 MHz, CDCl<sub>3</sub>): δ (ppm) 8.00-7.97 (m, 2H), 7.61-7.56 (m, 1H), 7.50-7.46 (m, 2H), 7.22- 7.19 (m, 2H), 6.89-6.85 (m, 2H), 3.81 (s, 3H), 3.30 (t, *J* = 7.6 Hz, 2H), 3.04 (t, *J* = 7.6 Hz, 2H). <sup>13</sup>C NMR (75 MHz, CDCl<sub>3</sub>): δ (ppm) 199.4, 158.0, 136.9, 133.3, 133.0, 129.4, 128.6, 128.0, 113.9, 55.3, 40.7, 29.3.

**3-phenyl-1-(p-tolyl)propan-1-one<sup>25</sup> (5ah):** Eluent: Hexane/Ethyl acetate (20:1). Colourless liquid (yield = 92%, 206mg). <sup>1</sup>H NMR (300 MHz, CDCl<sub>3</sub>):  $\delta$  (ppm) 7.92 (d,  $J$  = 8.0 Hz, 2H), 7.39-7.26 (m, 7H), 3.33 (t,  $J$  = 7.7 Hz, 2H), 3.12 (t,  $J$  = 7.7 Hz, 2H). <sup>13</sup>C NMR (75 MHz, CDCl<sub>3</sub>):  $\delta$  (ppm) 198.9, 143.9, 141.5, 134.5, 129.4, 128.6, 128.5, 128.3, 126.2, 40.4, 30.3, 21.7.

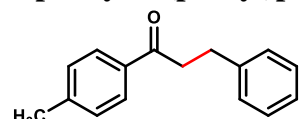

**3-phenyl-1-(m-tolyl)propan-1-one<sup>25</sup> (5ai):** Eluent: Hexane/Ethyl acetate (20:1). White solid (yield = 85%, 190 mg). <sup>1</sup>H NMR (300 MHz, CDCl<sub>3</sub>):  $\delta$  (ppm) 7.80-7.76 (m, 2H), 7.39-7.29 (m, 7H), 3.32 (t,  $J$  = 8.1 Hz, 2H), 3.12-3.07 (m, 2H), 2.43 (s, 3H). <sup>13</sup>C NMR (75 MHz, CDCl<sub>3</sub>):  $\delta$  (ppm) 199.5, 141.4, 138.4, 136.9, 133.8, 128.6, 128.4, 128.5, 128.4, 126.1, 125.3, 40.5, 30.2, 21.3.

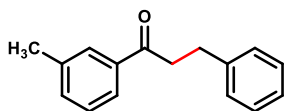

**3-phenyl-1-(o-tolyl)propan-1-one<sup>25</sup> (5aj):** Eluent: Hexane/Ethyl acetate (20:1). Colorless liquid (yield = 75%, 168mg). <sup>1</sup>H NMR (300 MHz, CDCl<sub>3</sub>):  $\delta$  (ppm) 7.62 (d,  $J$  = 7.0 Hz, 1H), 7.27-7.21 (m, 8H), 3.25 (t,  $J$  = 7.6 Hz, 2H), 3.07 (t,  $J$  = 7.6 Hz, 2H), 2.49 (s, 3H). <sup>13</sup>C NMR (75 MHz, CDCl<sub>3</sub>):  $\delta$  (ppm) 203.41, 141.2, 138.1, 136.4, 136.2, 131.9, 129.4, 128.5, 128.4, 126.1, 125.7, 125.2, 43.2, 30.4, 21.3.

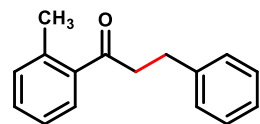

**1-(4-methoxyphenyl)-3-phenylpropan-1-one<sup>25</sup> (5ak):** Eluent: Hexane/Ethyl acetate (20:1). White solid (yield = 93%, 223mg). <sup>1</sup>H NMR (300 MHz, CDCl<sub>3</sub>):  $\delta$  (ppm) 7.97 (d,  $J$  = 8.8 Hz, 2H), 7.23 (d,  $J$  = 6.9 Hz, 1H), 7.17 (d,  $J$  = 7.0 Hz, 1H), 6.95 (d,  $J$  = 8.8 Hz, 2H), 3.89 (s, 3H), 3.28 (t,  $J$  = 7.6 Hz, 2H), 3.09 (t,  $J$  = 7.6 Hz, 2H). <sup>13</sup>C NMR (75 MHz, CDCl<sub>3</sub>):  $\delta$  (ppm) 197.9, 163.3, 141.5, 130.5, 129.0, 128.5, 128.4, 126.2, 113.6, 55.4, 40.1, 30.4.

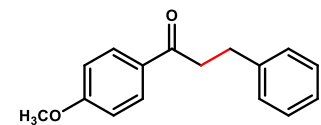

**1-(3-methoxyphenyl)-3-phenylpropan-1-one<sup>26</sup> (5al):** Eluent: Hexane/Ethyl acetate (20:1). White solid (yield = 88%, 211mg). <sup>1</sup>H NMR (300 MHz, CDCl<sub>3</sub>):  $\delta$  (ppm) 7.58-7.52 (m, 2H), 7.41-7.30 (m, 5H), 7.19-7.15 (m, 2H), 3.88 (s, 3H), 3.33 (t,  $J$  = 7.7 Hz, 2H), 3.10 (t,  $J$  = 7.7 Hz, 2H). <sup>13</sup>C NMR (75 MHz, CDCl<sub>3</sub>):  $\delta$  (ppm) 199.1, 159.9, 141.3, 138.3, 129.6, 128.6, 128.5, 126.2, 120.7, 119.6, 112.3, 55.5, 40.6, 30.2.

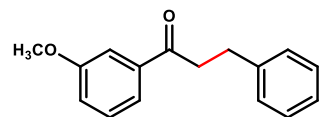

**1-(4-fluorophenyl)-3-phenylpropan-1-one<sup>26</sup> (5am):** Eluent: Hexane/Ethyl acetate (20:1). White solid (yield = 68%, 155mg). <sup>1</sup>H NMR (300 MHz, CDCl<sub>3</sub>):  $\delta$  (ppm) 8.05-8.00 (m, 2H), 7.38-7.24 (m, 5H), 7.19-7.12 (m, 2H), 3.31 (t,  $J$  = 7.6 Hz, 2H), 3.12 (t,  $J$  = 7.6 Hz, 2H). <sup>13</sup>C NMR (75 MHz, CDCl<sub>3</sub>):  $\delta$  (ppm) 197.6,

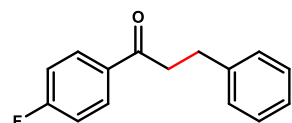

167.0, 164.5, 141.2, 133.47, 133.3, 130.71 (d,  $J = 9.3$  Hz), 128.55 (d,  $J = 13.0$  Hz), 115.71 (d,  $J = 21.8$  Hz), 40.4, 30.1.  $^{19}\text{F}$  NMR (282 MHz,  $\text{CDCl}_3$ ):  $\delta = -105.2$  (s, 1F).

**1-(4-Bromophenyl)-3-phenylpropan-1-one<sup>26</sup> (5an)**: Eluent: Hexane/Ethyl acetate (20:1). White

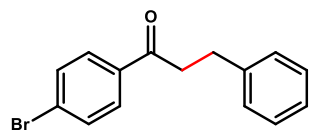

solid (yield = 57%, 165mg).  $^1\text{H}$  NMR (300 MHz,  $\text{CDCl}_3$ ):  $\delta$  (ppm) 7.84 (d,  $J = 8.6$  Hz, 2H), 7.61 (d,  $J = 8.6$  Hz, 2H), 7.33-7.30 (m, 2H), 7.25-7.21 (m, 3H), 3.32-3.26 (m, 2H), 3.11-3.06 (m, 2H).  $^{13}\text{C}$  NMR (75 MHz,  $\text{CDCl}_3$ ):  $\delta$  (ppm) 198.2, 141.0, 135.6, 131.9, 129.6, 128.9, 128.6, 128.5, 128.5, 128.4, 128.2, 126.4,

126.2, 40.4, 30.0.

All the reactions were carried out in 1.0 mmol scale of reactant and according to the general procedure for Friedländer quinoline synthesis.

**2-phenyl quinoline<sup>27</sup> (9aa)**: Eluent: Hexane/Ethyl acetate (20:1). Fawn solid (yield = 92%,

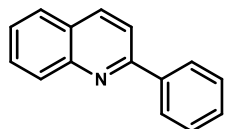

189mg).  $^1\text{H}$  NMR (300 MHz,  $\text{CDCl}_3$ ):  $\delta$  (ppm) 8.26-8.18 (m, 4H), 7.92-7.84 (m, 2H), 7.78-7.73 (m, 1H), 7.59-7.47 (m, 4H).  $^{13}\text{C}$  NMR (75 MHz,  $\text{CDCl}_3$ ):  $\delta$  (ppm) 157.4, 148.3, 139.7, 136.8, 129.8, 129.7, 129.4, 128.9, 127.6, 127.5,

127.2, 126.3, 119.1.

**2-(p-tolyl)quinoline<sup>27</sup> (9ab)**: Eluent: Hexane/Ethyl acetate (20:1). Fawn solid (yield = 94%,

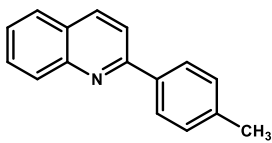

207mg).  $^1\text{H}$  NMR (300 MHz,  $\text{CDCl}_3$ ):  $\delta$  (ppm) 8.21 (d,  $J = 8.5$  Hz, 2H), 8.11 (d,  $J = 8.2$  Hz, 2H), 7.89-7.82 (m, 2H), 7.78-7.72 (m, 1H), 7.57-7.51 (m, 1H), 7.37 (d,  $J = 7.8$  Hz, 2H), 2.47 (s, 3H).  $^{13}\text{C}$  NMR (75 MHz,  $\text{CDCl}_3$ ):  $\delta$  (ppm) 157.4, 148.3, 139.4, 136.8 (d,  $J = 16.6$  Hz), 129.6 (d,  $J = 5.7$  Hz), 129.3, 128.5, 127.5, 127.1,

126.1, 118.9, 21.4.

**2-(m-tolyl)quinoline<sup>28</sup> (9ac)**: Eluent: Hexane/Ethyl acetate (20:1). Yellowish Liquid (yield =

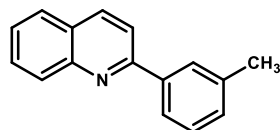

90%, 197mg).  $^1\text{H}$  NMR (300 MHz,  $\text{CDCl}_3$ ):  $\delta$  (ppm) 8.25-8.20 (m, 2H), 7.95 (d,  $J = 7.7$  Hz, 1H), 7.85 (d,  $J = 6.6$  Hz, 1H), 7.80-7.73 (m, 2H), 7.55 (t,  $J = 6.9$  Hz, 1H), 7.47-7.37 (m, 2H), 7.31 (d,  $J = 6.7$  Hz, 1H), 2.51 (s,

3H).  $^{13}\text{C}$  NMR (75 MHz,  $\text{CDCl}_3$ ):  $\delta$  (ppm) 157.6, 148.3, 138.5, 136.7, 133.8, 130.1, 129.7, 129.6, 128.7, 128.4, 128.3, 127.4, 126.2, 124.7, 119.1, 21.6.



**2-(o-tolyl)quinoline<sup>28</sup> (9ad)**: Eluent: Hexane/Ethyl acetate (20:1). Fawn solid (yield = 84%,

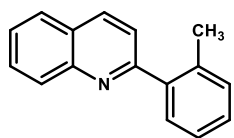

185mg). <sup>1</sup>H NMR (300 MHz, CDCl<sub>3</sub>): δ (ppm) 8.22 (dd, *J* = 15.9, 8.5 Hz, 2H), 7.89 (dd, *J* = 8.2, 1.5 Hz, 1H), 7.77 (m, 1H), 7.62-7.51 (m, 3H), 7.40-7.31 (m, 3H), 2.44 (s, 3H). <sup>13</sup>C NMR (75 MHz, CDCl<sub>3</sub>): δ (ppm) 160.3, 147.9,

140.8, 136.1, 136.0, 130.9, 129.7, 129.6, 128.5, 127.5, 126.8, 126.4, 126.0, 122.4, 20.4.

**2-(4-methoxyphenyl)quinoline<sup>27</sup> (9ae)**: Eluent: Hexane/Ethyl acetate (20:1). White solid (yield

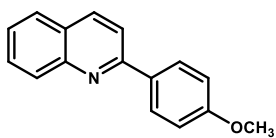

= 89%, 209mg). <sup>1</sup>H NMR (300 MHz, CDCl<sub>3</sub>): δ (ppm) 8.22-8.15 (m, 4H), 7.88-7.82 (m, 2H), 7.73 (t, *J* = 6.9 Hz, 1H), 7.52 (t, *J* = 7.5 Hz, 1H), 7.08 (d, *J* = 8.9 Hz, 2H), 3.92 (s, 3H). <sup>13</sup>C NMR (75 MHz, CDCl<sub>3</sub>): δ (ppm)

160.8, 157.0, 148.3, 136.7, 132.3, 129.6, 129.5, 128.9, 127.4, 126.9, 125.9, 118.6, 114.2, 55.4.

**2-(3-methoxyphenyl)quinoline<sup>28</sup> (9af)**: Eluent: Hexane/Ethyl acetate (20:1). White solid (yield =

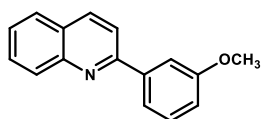

87%, 205mg). <sup>1</sup>H NMR (300 MHz, CDCl<sub>3</sub>): δ (ppm) 8.24-8.20 (m, 2H), 7.89-7.81 (m, 3H), 7.78-7.72 (m, 2H), 7.57-7.51 (m, 2H), 7.07-7.03 (m, 1H), 3.95 (s, 3H). <sup>13</sup>C NMR (75 MHz, CDCl<sub>3</sub>): δ (ppm) 160.2, 159.8, 148.2,

141.2, 136.8, 129.8, 129.8, 129.7, 127.5, 126.4, 120.0, 119.1, 115.4, 112.8, 55.4.

**2-(4-bromophenyl)quinoline<sup>28</sup> (9ag)**: Eluent: Hexane/Ethyl acetate (20:1). Beige solid (yield =

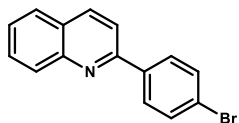

86%, 245mg). <sup>1</sup>H NMR (300 MHz, CDCl<sub>3</sub>): δ (ppm) 8.26 (d, *J* = 7.8 Hz, 1H), 8.18 (dd, *J* = 8.5, 1.0 Hz, 1H), 8.08 (d, *J* = 8.6 Hz, 2H), 7.87 (d, *J* = 8.6 Hz, 2H), 7.79-7.74 (m, 1H), 7.68 (d, *J* = 8.6 Hz, 2H), 7.57 (t, *J* = 6.9 Hz, 1H). <sup>13</sup>C NMR

(75 MHz, CDCl<sub>3</sub>): δ (ppm) 156.1, 148.3, 138.5, 137.0, 132.0, 131.4, 129.9, 129.7, 129.1, 127.5, 127.3, 126.6, 123.9, 118.5.

**2-(3-bromophenyl)quinoline<sup>29</sup> (9ah)**: Eluent: Hexane/Ethyl acetate (20:1). Beige solid (yield =

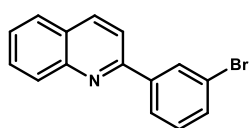

72%, 204mg). <sup>1</sup>H NMR (300 MHz, CDCl<sub>3</sub>): δ (ppm) 8.38 (s, 1H), 8.26-8.18 (m, 2H), 8.10 (s, 1H), 7.85 (d, *J* = 8.0 Hz, 2H), 7.76 (t, *J* = 7.8 Hz, 1H), 7.59 (t, *J* = 8.4 Hz, 2H), 7.43-7.33 (m, 1H). <sup>13</sup>C NMR (75 MHz, CDCl<sub>3</sub>): δ (ppm)

155.6, 148.2, 141.7, 137.0, 132.2, 131.4, 130.6, 130.3, 129.9, 129.8, 127.5, 126.7, 126.0, 123.2, 118.7

**2-(4-fluorophenyl)quinoline<sup>28</sup> (9ai)**: Eluent: Hexane/Ethyl acetate (20:1). Beige solid (yield =

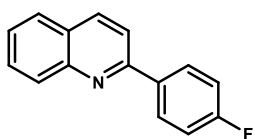

84%, 188mg). <sup>1</sup>H NMR (300 MHz, CDCl<sub>3</sub>): δ (ppm) 8.26-8.16 (m, 4H), 7.86 (d, *J* = 8.6 Hz, 2H), 7.76 (t, *J* = 6.9 Hz, 1H), 7.56 (t, *J* = 7.5 Hz, 1H), 7.27-7.21 (m, 2H). <sup>13</sup>C-NMR (75 MHz, CDCl<sub>3</sub>): δ (ppm) 165.5, 162.2, 156.3,

148.2, 136.9, 135.9, 129.8, 129.5, 129.4, 127.5, 126.4, 118.7, 115.9, 115.7.  $^{19}\text{F}$  NMR (282 MHz,  $\text{CDCl}_3$ ):  $\delta = -117.3$  (s, 1F)

**2-(2-fluorophenyl)quinoline<sup>29</sup> (9aj)**: Eluent: Hexane/Ethyl acetate (20:1). Fawn Liquid (yield =

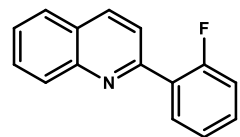

55%, 123mg).  $^1\text{H}$  NMR (300 MHz,  $\text{CDCl}_3$ ):  $\delta$  (ppm) 8.32-8.29 (m, 1H), 8.09-8.05 (m, 2H), 8.0-7.97 (m, 1H), 7.87-7.84 (m, 1H), 7.80-7.74 (m, 1H), 7.61-7.55 (m, 1H), 7.42-7.34 (m, 1H), 7.13-7.10 (m, 1H), 7.02-6.96 (m, 1H).  $^{13}\text{C}$

NMR (75 MHz,  $\text{CDCl}_3$ ):  $\delta$  (ppm) 161.0, 158.0, 144.8, 137.7, 132.1, 130.5, 127.6 (d,  $J = 4.3$  Hz), 127.0, 126.7, 118.7 (d,  $J = 6.3$  Hz), 117.3.  $^{19}\text{F}$  NMR (282 MHz,  $\text{CDCl}_3$ ):  $\delta = -117.3$  (s, F).

**2-(4-nitrophenyl)quinoline<sup>29</sup> (9ak)**: Eluent: Hexane/Ethyl acetate (20:1). Pastel orange solid

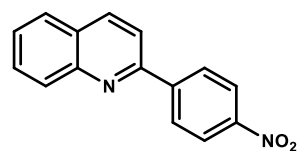

(yield = 81%, 203mg).  $^1\text{H}$  NMR (300 MHz,  $\text{CDCl}_3$ ):  $\delta$  (ppm) 8.43-8.36 (m, 4H), 8.35-8.32 (m, 1H), 8.24-8.20 (m, 1H), 7.96 (d,  $J = 8.6$  Hz, 1H), 7.92-7.89 (m, 1H), 7.84-7.78 (m, 1H), 7.65-7.60 (m, 1H).  $^{13}\text{C}$  NMR (75

MHz,  $\text{CDCl}_3$ ):  $\delta$  (ppm) 157.6, 148.4, 148.3, 145.5, 137.4, 130.3, 130.0, 128.4, 128.2, 127.6, 127.3, 124.1, 118.8.

**2-(3-nitrophenyl)quinoline<sup>30</sup> (9al)**: Eluent: Hexane/Ethyl acetate (20:1). Pastel orange solid

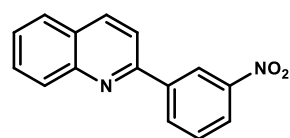

(yield = 67%, 168mg).  $^1\text{H}$  NMR (300 MHz,  $\text{CDCl}_3$ ):  $\delta$  (ppm) 9.07 (s, 1H), 8.58 (d,  $J = 7.8$  Hz, 1H), 8.33 (d,  $J = 8.2$  Hz, 2H), 8.22 (d,  $J = 8.5$  Hz, 1H), 7.97 (d,  $J = 8.6$  Hz, 1H), 7.90 (d,  $J = 6.7$  Hz, 1H), 7.83-7.70 (m, 2H), 7.61

(t,  $J = 6.9$  Hz, 1H).  $^{13}\text{C}$  NMR (75 MHz,  $\text{CDCl}_3$ ):  $\delta$  (ppm) 154.5, 148.9, 148.3, 141.3, 137.5, 133.3, 130.2, 129.9, 129.8, 129.0, 127.6, 127.1, 123.9, 122.5, 118.4.

**2-hexylquinoline<sup>32</sup> (9am)**: Eluent: Hexane/Ethyl acetate (20:1). Colorless Liquid (yield = 85%,

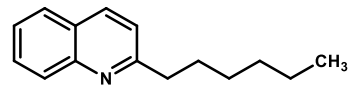

182mg).  $^1\text{H}$  NMR (300 MHz,  $\text{CDCl}_3$ ):  $\delta$  (ppm) 8.06 (t,  $J = 8.1$  Hz, 2H), 7.76 (dd,  $J = 8.1, 1.5$  Hz, 1H), 7.68 (ddd,  $J = 8.5, 6.8, 1.5$  Hz,

1H), 7.47 (ddd,  $J = 8.1, 6.8, 1.2$  Hz, 1H), 7.29 (d,  $J = 8.5$  Hz, 1H), 3.00 – 2.95 (m, 2H), 1.87 – 1.77 (m, 2H), 1.37-1.27 (m, 6H), 0.93-0.87 (m, 3H).  $^{13}\text{C}$  NMR (75 MHz,  $\text{CDCl}_3$ ):  $\delta$  (ppm) 163.1, 147.9, 136.1, 129.3, 128.8, 127.5, 126.7, 125.6, 121.3, 39.3, 31.7, 30.0, 29.2, 22.6, 14.1.

**2-cyclohexylquinoline<sup>33</sup> (9an)**: Eluent: Hexane/Ethyl acetate (20:1). Yellowish Oil (yield = 89%,

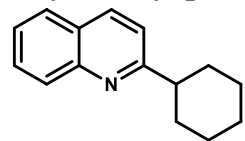

188mg).  $^1\text{H}$  NMR (300 MHz,  $\text{CDCl}_3$ ):  $\delta$  (ppm) 8.11 (d,  $J = 3.0$  Hz, 1H), 8.08 (d,  $J = 3.4$  Hz, 1H), 7.79 (dd,  $J = 8.1, 1.5$  Hz, 1H), 7.70 (ddd,  $J = 8.5, 6.9, 1.5$  Hz, 1H), 7.50 (ddd,  $J = 8.1, 6.9, 1.2$  Hz, 1H), 7.36 (d,  $J = 8.6$  Hz, 1H), 2.99-

2.93 (m, 1H), 2.09-2.03 (m, 3H), 1.95-1.90 (m, 2H), 1.69-1.48 (m, 5H).  $^{13}\text{C}$  NMR (75 MHz,

CDCl<sub>3</sub>):  $\delta$  (ppm) 166.8, 147.9, 136.2, 129.2, 129.0, 128.2, 127.4, 125.6, 119.6, 47.62, 32.8, 28.5, 26.6, 26.2, 25.7.

**2-(naphthalen-2-yl)quinoline<sup>28</sup> (9ao)**: Eluent: Hexane/Ethyl acetate (20:1). White solid (yield =

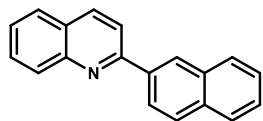

84%, 213mg). <sup>1</sup>H NMR (300 MHz, CDCl<sub>3</sub>):  $\delta$  (ppm) 8.65 (s, 1H), 8.41 (dd,  $J = 8.6, 1.8$  Hz, 1H), 8.27 (dd,  $J = 8.5, 4.6$  Hz, 2H), 8.07 – 8.02 (m, 3H), 7.94 – 7.92 (m, 1H), 7.87 (d,  $J = 6.7$ , Hz, 1H), 7.80 – 7.76 (m, 1H), 7.59 – 7.54 (m, 3H). <sup>13</sup>C NMR (75 MHz, CDCl<sub>3</sub>):  $\delta$  (ppm) 157.2, 148.4, 137.0, 136.8, 133.9, 133.5, 129.8, 129.7, 128.8, 128.6, 128.3, 127.7, 127.5, 127.3, 127.2, 126.7, 126.4, 125.1, 119.2.

**6-chloro-2-phenylquinoline<sup>30</sup> (10aa)**: Eluent: Hexane/Ethyl acetate (20:1). White solid (yield =

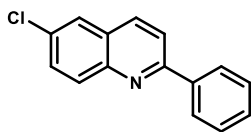

94%, 225mg). <sup>1</sup>H NMR (300 MHz, CDCl<sub>3</sub>):  $\delta$  (ppm) 8.19-8.12(m, 4H), 7.92 (d,  $J = 8.7$  Hz, 1H), 7.83 (d,  $J = 2.3$  Hz, 1H), 7.68 (dd,  $J = 9.0, 2.3$  Hz, 1H), 7.59-7.47 (m, 3H). <sup>13</sup>C NMR (75 MHz, CDCl<sub>3</sub>):  $\delta$  (ppm) 157.6, 146.7, 139.2, 135.9, 131.9, 131.3, 130.6, 129.6, 128.9, 127.7, 127.5, 126.2, 119.8.

**6-chloro-2-(3-bromophenyl)quinoline (10ab)**: Eluent: Hexane/Ethyl acetate (20:1). White solid

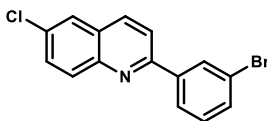

(yield = 92%, 252mg). <sup>1</sup>H NMR (300 MHz, CDCl<sub>3</sub>):  $\delta$  (ppm) 8.17-8.09 (m, 4H), 7.89-7.83 (m, 2H), 7.69 (dd,  $J = 9.0, 2.3$  Hz, 1H), 7.54-7.50 (m, 2H). <sup>13</sup>C NMR (75 MHz, CDCl<sub>3</sub>):  $\delta$  (ppm) 156.2, 146.6, 137.6, 136.1,

135.8, 132.2, 131.3, 130.8, 129.1, 128.8, 127.8, 126.2, 119.4. MS (ESI+): C<sub>15</sub>H<sub>10</sub>BrClN ([M+H]<sup>+</sup>); calculated: 317.96, found: 317.98.

**6-chloro-2-(4-bromophenyl)quinoline (10ac)**: Eluent: Hexane/Ethyl acetate (20:1). White solid

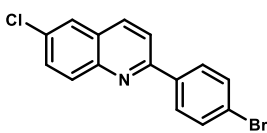

(yield = 92%, 252mg). <sup>1</sup>H NMR (300 MHz, CDCl<sub>3</sub>):  $\delta$  (ppm) 8.17-8.09 (m, 4H), 7.89-7.83 (m, 2H), 7.69 (dd,  $J = 9.0, 2.3$  Hz, 1H), 7.54-7.50 (m, 2H). <sup>13</sup>C NMR (75 MHz, CDCl<sub>3</sub>):  $\delta$  (ppm) 156.2, 146.6, 137.6, 136.1,

135.8, 132.2, 131.3, 130.8, 129.1, 128.8, 127.8, 126.2, 119.4. MS (ESI+): C<sub>15</sub>H<sub>10</sub>BrClN ([M+H]<sup>+</sup>); calculated: 317.96, found: 317.98.

**6-chloro-2-(4-chlorophenyl)quinoline<sup>30</sup> (10ad)**: Eluent: Hexane/Ethyl acetate (20:1). White

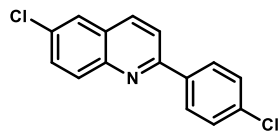

solid (yield = 92%, 252mg). <sup>1</sup>H NMR (300 MHz, CDCl<sub>3</sub>):  $\delta$  (ppm) 8.17-8.09 (m, 4H), 7.89-7.83 (m, 2H), 7.69 (dd,  $J = 9.0, 2.3$  Hz, 1H), 7.54-7.50 (m, 2H). <sup>13</sup>C NMR (75 MHz, CDCl<sub>3</sub>):  $\delta$  (ppm) 156.2, 146.6, 137.6, 136.1,

135.8, 132.2, 131.3, 130.8, 129.1, 128.8, 127.8, 126.2, 119.4.

**6-chloro-2-(4-fluorophenyl)quinoline (10ae):** Eluent: Hexane/Ethyl acetate (20:1). White solid

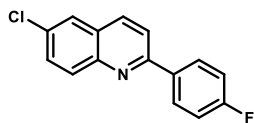

(yield = 87%, 224mg).  $^1\text{H}$  NMR (300 MHz,  $\text{CDCl}_3$ ):  $\delta$  (ppm) 8.20-8.08 (m, 4H), 7.88-7.82 (m, 2H), 7.68 (dd,  $J = 9.0, 2.4$  Hz, 1H), 7.26-7.20 (m, 2H).

$^{13}\text{C}$  NMR (75 MHz,  $\text{CDCl}_3$ ):  $\delta$  (ppm) 165.6, 162.3, 156.4, 146.6, 135.9, 132.0, 131.2, 130.7, 129.5, 129.3, 127.6, 126.2, 119.4, 116.0, 115.7.  $^{19}\text{F}$  NMR (282 MHz,  $\text{CDCl}_3$ ):  $\delta = -111.9$  (s, 1F). MS (ESI+):  $\text{C}_{15}\text{H}_{10}\text{ClFN}$  ( $[\text{M}+\text{H}]^+$ ); calculated: 258.04, found: 258.06.

**6-chloro-2-(2-fluorophenyl)quinoline (10af):** Eluent: Hexane/Ethyl acetate (20:1). White solid

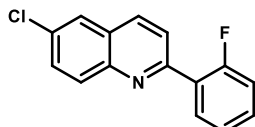

(yield = 60%, 154mg).  $^1\text{H}$  NMR (300 MHz,  $\text{CDCl}_3$ ):  $\delta$  (ppm) 8.16-8.10 (m, 3H), 7.94 (dd,  $J = 8.6, 2.6$  Hz, 1H), 7.85 (d,  $J = 2.3$  Hz, 1H), 7.69 (dd,  $J = 9.0, 2.3$  Hz, 1H), 7.49-7.44 (m, 1H), 7.34 (td,  $J = 7.5, 1.2$  Hz, 1H), 7.23 (ddd,

$J = 11.4, 8.2, 1.2$  Hz, 1H).  $^{13}\text{C}$  NMR (75 MHz,  $\text{CDCl}_3$ ):  $\delta$  (ppm) 162.1, 159.6, 154.3 (d,  $J = 2.0$  Hz), 146.7, 135.3, 132.4, 131.43 (d,  $J = 2.9$  Hz), 131.3, 131.1 (d,  $J = 8.6$  Hz), 130.6, 127.8, 126.2, 124.8 (d,  $J = 3.4$  Hz), 123.3 (d,  $J = 8.4$  Hz), 116.3 (d,  $J = 22.8$  Hz).  $^{19}\text{F}$  NMR (282 MHz,  $\text{CDCl}_3$ ):  $\delta = -117.0$  (s, 1F) MS (ESI+):  $\text{C}_{15}\text{H}_{10}\text{ClFN}$  ( $[\text{M}+\text{H}]^+$ ); calculated: 258.04, found: 258.06.

**6-chloro-2-(4-methoxyphenyl)quinoline (10ag):** Eluent: Hexane/Ethyl acetate (20:1). White

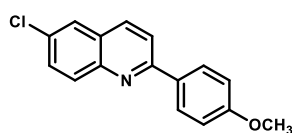

solid (yield = 92%, 245mg).  $^1\text{H}$  NMR (300 MHz,  $\text{CDCl}_3$ ):  $\delta$  (ppm) 8.17-8.07 (m, 4H), 7.87 (d,  $J = 8.7$  Hz, 1H), 7.80 (d,  $J = 2.3$  Hz, 1H), 7.66 (dd,  $J = 9.0, 2.4$  Hz, 1H), 7.07 (d,  $J = 8.9$  Hz, 2H), 3.91 (s, 1H).  $^{13}\text{C}$  NMR (75

MHz,  $\text{CDCl}_3$ ):  $\delta$  (ppm) 161.0, 157.1, 146.7, 135.7, 131.8, 131.5, 131.1, 130.5, 128.9, 127.5, 126.1, 119.4, 114.3, 55.4. MS (ESI+):  $\text{C}_{16}\text{H}_{13}\text{ClNO}$  ( $[\text{M}+\text{H}]^+$ ); calculated: 270.06, found: 270.07.

**6-chloro-2-(3-methoxyphenyl)quinoline (10ah):** Eluent: Hexane/Ethyl acetate (20:1). White

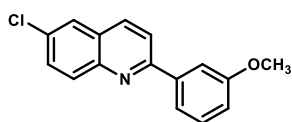

solid (yield = 90%, 240mg).  $^1\text{H}$  NMR (300 MHz,  $\text{CDCl}_3$ ):  $\delta$  (ppm) 8.13-8.07 (m, 2H), 7.86 (d,  $J = 9.6$  Hz, 1H), 7.79-7.76 (m, 2H), 7.71-7.67 (m, 2H), 7.44 (t,  $J = 7.9$  Hz, 1H), 7.04 (dd,  $J = 8.2, 2.5$  Hz, 1H), 3.94 (s,

3H).  $^{13}\text{C}$  NMR (75 MHz,  $\text{CDCl}_3$ ):  $\delta$  (ppm) 160.2, 157.3, 146.6, 140.6, 135.8, 131.9, 131.3, 130.6, 129.9, 127.8, 126.1, 119.9, 119.8, 115.6, 112.7, 55.4. MS (ESI+):  $\text{C}_{16}\text{H}_{13}\text{ClNO}$  ( $[\text{M}+\text{H}]^+$ ); calculated: 270.06, found: 270.07.

**6-chloro-2-(m-tolyl)quinoline (10ai):** Eluent: Hexane/Ethyl acetate (20:1). White solid (yield =

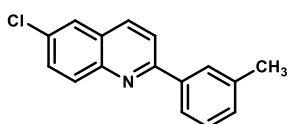

92%, 233mg).  $^1\text{H}$  NMR (300 MHz,  $\text{CDCl}_3$ ):  $\delta$  (ppm) 8.12-8.06 (m, 4H), 7.88 (d,  $J = 8.7$  Hz, 1H), 7.80 (d,  $J = 2.4$  Hz, 1H), 7.66 (dd,  $J = 9.0, 2.4$  Hz, 1H), 7.38-7.34 (m, 2H), 2.46 (s, 3H).  $^{13}\text{C}$  NMR (75 MHz,  $\text{CDCl}_3$ ):  $\delta$

(ppm) 157.5, 146.7, 139.7, 136.4, 135.7, 131.7, 131.3, 130.5, 129.7, 129.3, 128.5, 127.6, 127.4, 126.1, 119.7, 21.4. MS (ESI+): C<sub>16</sub>H<sub>13</sub>ClN ([M+H]<sup>+</sup>); calculated: 254.07, found: 254.09.

**6-chloro-2-(o-tolyl)quinoline (10aj):** Eluent: Hexane/Ethyl acetate (20:1). White solid (yield =

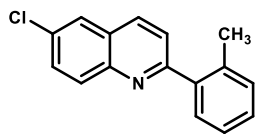

86%, 218mg). <sup>1</sup>H NMR (300 MHz, CDCl<sub>3</sub>): δ (ppm) 8.13 (t, *J* = 8.1 Hz, 2H), 7.87 (d, *J* = 2.4 Hz, 1H), 7.69 (dd, *J* = 9.0, 2.3 Hz, 1H), 7.59 (d, *J* = 8.5 Hz, 1H), 7.53-7.50 (m, 1H), 7.41-7.32 (m, 3H), 2.44 (s, 3H). <sup>13</sup>C NMR (75 MHz, CDCl<sub>3</sub>): δ (ppm) 160.5, 146.3, 140.3, 136.0, 132.1, 131.2, 130.9, 129.7, 128.7, 127.3, 126.2, 126.1, 123.3, 20.4. MS (ESI+): C<sub>16</sub>H<sub>13</sub>ClN ([M+H]<sup>+</sup>); calculated: 254.07, found: 254.09.

**6-chloro-2-(4-nitrophenyl)quinoline (10ak):** Eluent: Hexane/Ethyl acetate (20:1). White solid

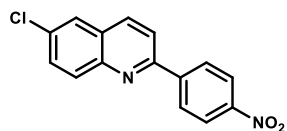

(yield = 70%, 198mg). <sup>1</sup>H NMR (300 MHz, CDCl<sub>3</sub>): δ (ppm) 8.23 (d, *J* = 8.7 Hz, 2H), 7.96 (d, *J* = 8.6 Hz, 2H), 7.86 (d, *J* = 2.3 Hz, 2H), 7.74 (d, *J* = 2.3 Hz, 1H), 7.45 (d, *J* = 2.5 Hz, 1H), 6.63 (d, *J* = 8.8 Hz, 1H). <sup>13</sup>C NMR (75 MHz, CDCl<sub>3</sub>): δ (ppm) 154.7, 148.5, 146.4, 144.7, 136.6, 133.2, 131.4, 129.3, 128.4, 128.1, 126.3, 124.1, 119.7. MS (ESI+): C<sub>15</sub>H<sub>9</sub>ClN<sub>2</sub>O<sub>2</sub> ([M]<sup>+</sup>); calculated: 284.03, found: 284.06.

**6-chloro-2-(pyridin-4-yl)quinoline (10al):** Eluent: Hexane/Ethyl acetate (20:1). White solid

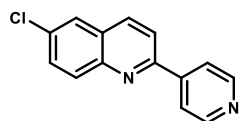

(yield = 76%, 182mg). <sup>1</sup>H NMR (300 MHz, CDCl<sub>3</sub>): δ (ppm) 8.73 (d, *J* = 5.1 Hz, 2H), 8.24 – 8.06 (m, 2H), 8.01 – 7.99 (m, 2H), 7.84 (dd, *J* = 8.7, 3.0 Hz, 1H), 7.78 – 7.72 (m, 1H), 7.67 – 7.63 (m, 1H). <sup>13</sup>C NMR (75 MHz, CDCl<sub>3</sub>): δ (ppm) 154.5, 150.4, 146.6, 137.3, 136.3, 132.9, 131.5, 131.0, 130.1, 129.9, 128.3, 127.6, 126.2, 121.5, 119.2. MS (ESI+): C<sub>14</sub>H<sub>9</sub>ClN<sub>2</sub> ([M]<sup>+</sup>); calculated: 240.04, found: 240.07.

**6-chloro-2-(naphthalen-2-yl)quinoline (10am):** Eluent: Hexane/Ethyl acetate (20:1). White

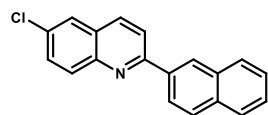

solid (yield = 88%, 253mg). <sup>1</sup>H NMR (300 MHz, CDCl<sub>3</sub>): δ (ppm) 8.61 (s, 1H), 8.37 (dd, *J* = 8.6, 1.8 Hz, 1H), 8.16 (dd, *J* = 8.8, 4.1 Hz, 2H), 8.06 – 7.98 (m, 3H), 7.95 – 7.89 (m, 1H), 7.83 (d, *J* = 2.4 Hz, 1H), 7.70 (dd, *J* = 9.0, 2.4 Hz, 1H), 7.59 – 7.54 (m, 2H). <sup>13</sup>C NMR (75 MHz, CDCl<sub>3</sub>): δ (ppm) 157.4, 149.8, 136.5, 135.9, 133.9, 133.5, 131.9, 131.3, 130.7, 128.9, 128.7, 127.8, 127.2, 126.9, 126.5, 126.2, 124.9, 119.9. MS (ESI+): C<sub>19</sub>H<sub>12</sub>ClN ([M]<sup>+</sup>); calculated: 289.06, found: 289.08.

**6-chloro-2-hexylquinoline (10an):** Eluent: Hexane/Ethyl acetate (20:1). Colorless Oil (yield =

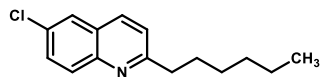

78%, 193mg). <sup>1</sup>H NMR (300 MHz, CDCl<sub>3</sub>): δ (ppm) 8.00-7.92 (m, 2H), 7.77-7.71 (m, 1H), 7.64-7.53 (m, 1H), 7.34-7.28 (m, 1H), 2.97 (dd,

$J = 8.6, 7.2$  Hz, 2H), 1.86-1.76 (m, 2H), 1.46-1.40 (m, 5H), 0.97-0.87 (m, 4H).  $^{13}\text{C}$  NMR (75 MHz,  $\text{CDCl}_3$ ):  $\delta$  (ppm) 163.5, 146.2, 135.3, 131.2, 130.4, 130.2, 127.3, 126.1, 122.3, 39.3, 31.7, 29.9, 29.2, 22.6, 14.1. MS (ESI+):  $\text{C}_{15}\text{H}_{19}\text{ClN}$  ( $[\text{M}+\text{H}]^+$ ); calculated: 248.120, found: 248.125.

**1H-indole**<sup>31</sup> (**11a**): Eluent: Hexane/Ethyl acetate (20:1). Colorless Liquid (yield = 90%, 105mg).

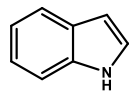

$^1\text{H}$  NMR (300 MHz,  $\text{CDCl}_3$ ):  $\delta$  (ppm) 8.17 (s, 1H), 7.70 (dd,  $J = 7.8, 1.2$  Hz, 1H), 7.45-7.41(m, 1H), 7.25-7.16(m, 3H), 6.61-6.59(m, 1H).  $^{13}\text{C}$  NMR (75 MHz,  $\text{CDCl}_3$ ):  $\delta$  (ppm) 135.8, 127.9, 124.1, 122.0, 120.7, 119.8, 111.0, 102.6.

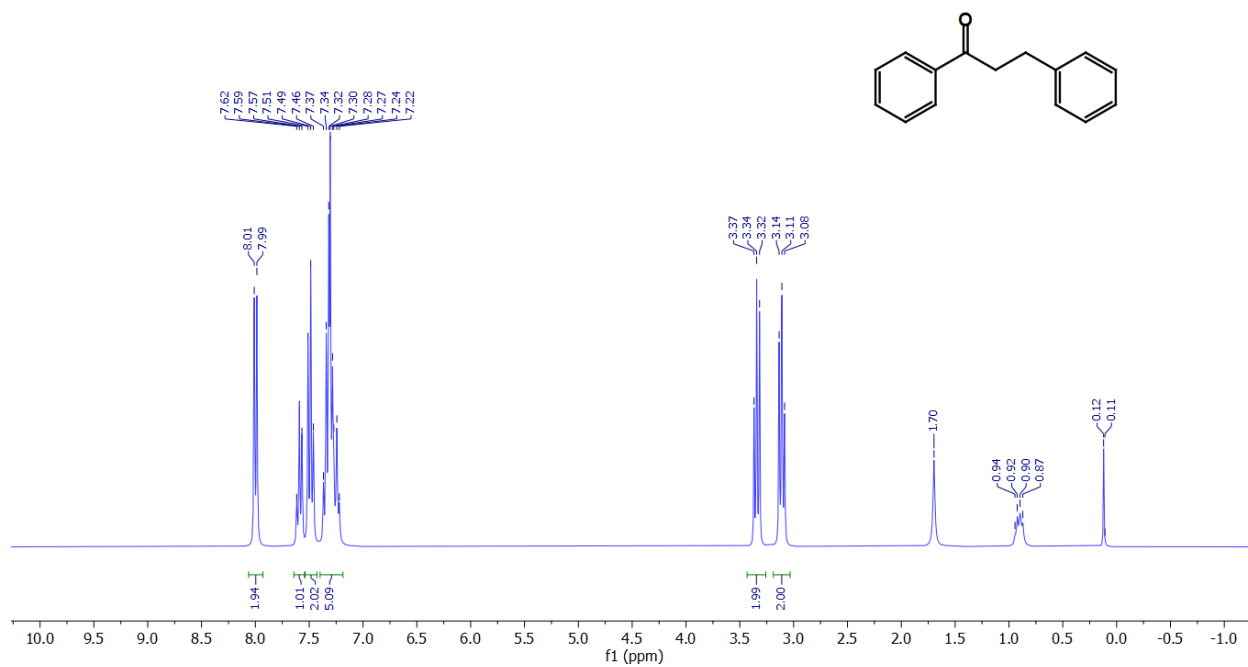

**Fig. S12**  $^1\text{H NMR}$  spectrum of compound **5aa** (300 MHz,  $\text{CDCl}_3$ ).

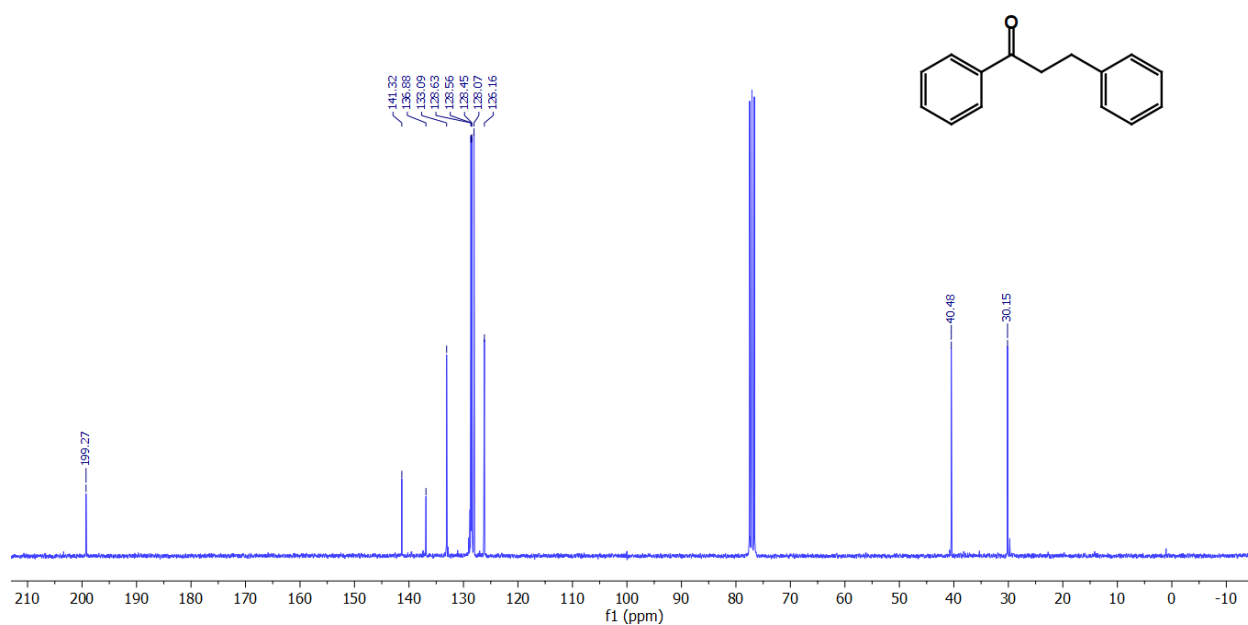

**Fig. S13**  $^{13}\text{C NMR}$  spectrum of compound **5aa** (75 MHz,  $\text{CDCl}_3$ ).

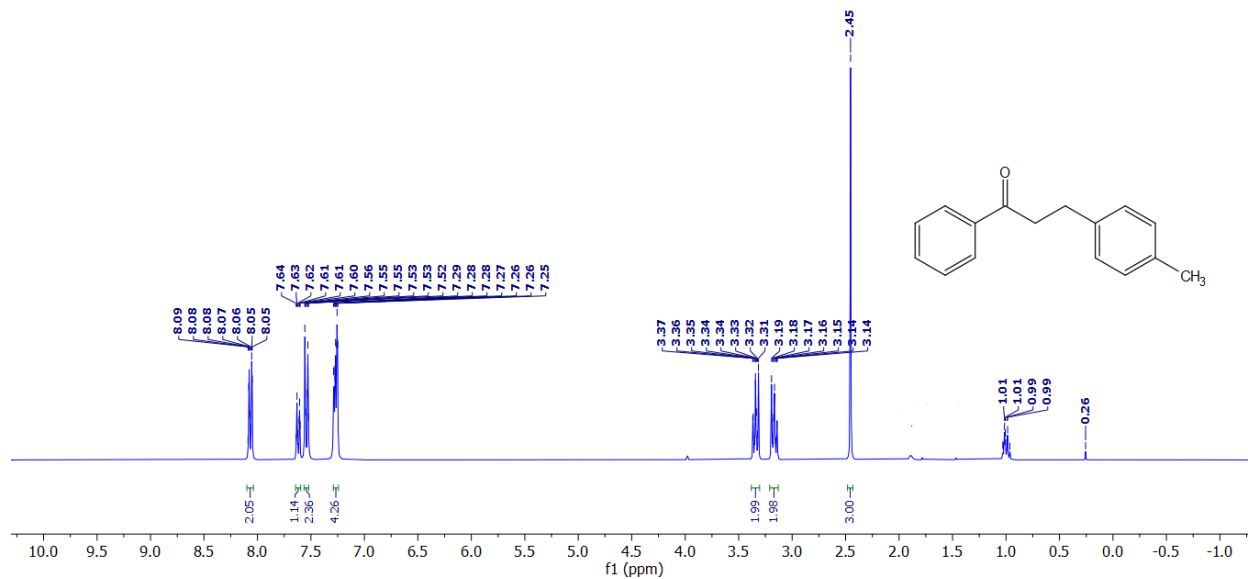

**Fig. S14**  $^1\text{H}$  NMR spectrum of compound **5ab** (300 MHz,  $\text{CDCl}_3$ ).

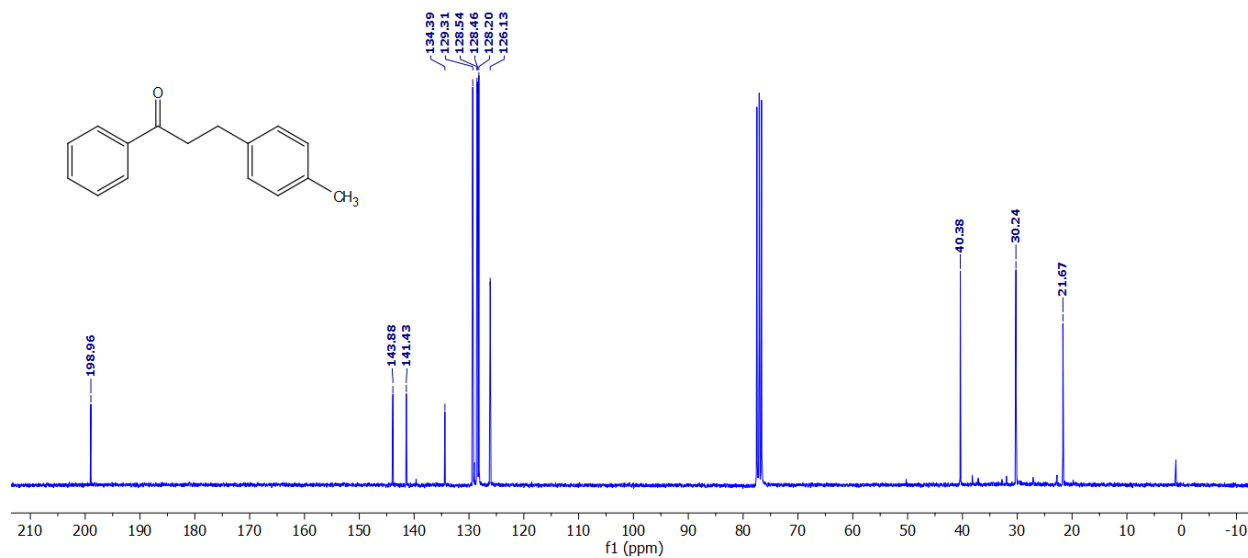

**Fig. S15**  $^{13}\text{C}$  NMR spectrum of compound **5ab** (75 MHz,  $\text{CDCl}_3$ ).



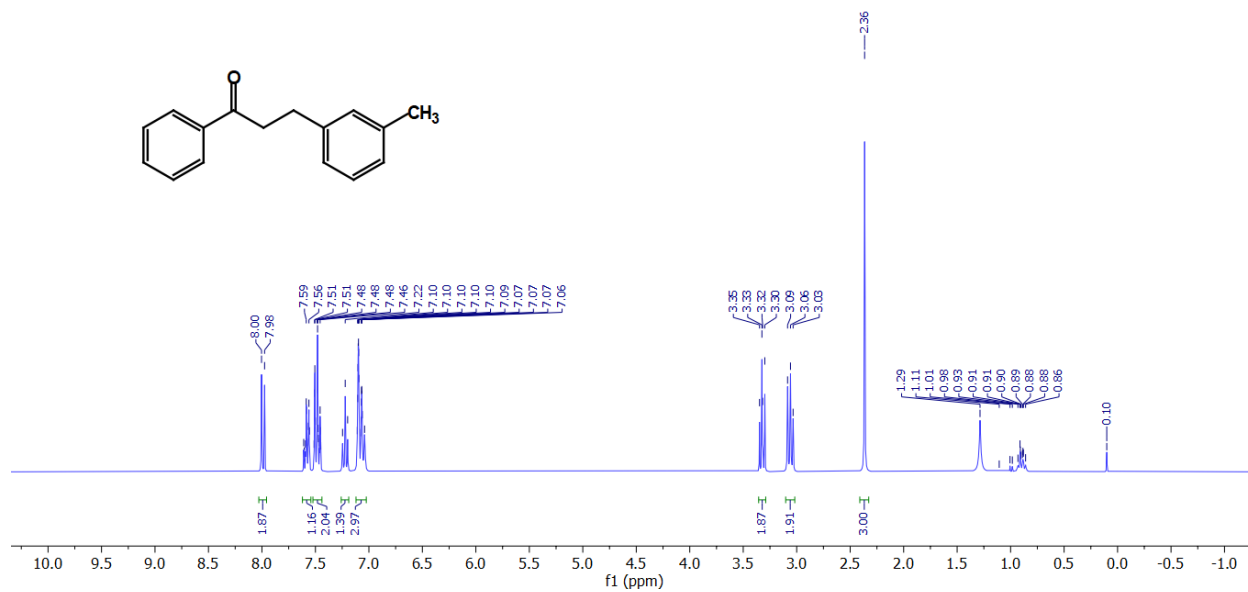

**Fig. S16** <sup>1</sup>H NMR spectrum of compound **5ac** (300 MHz, CDCl<sub>3</sub>).

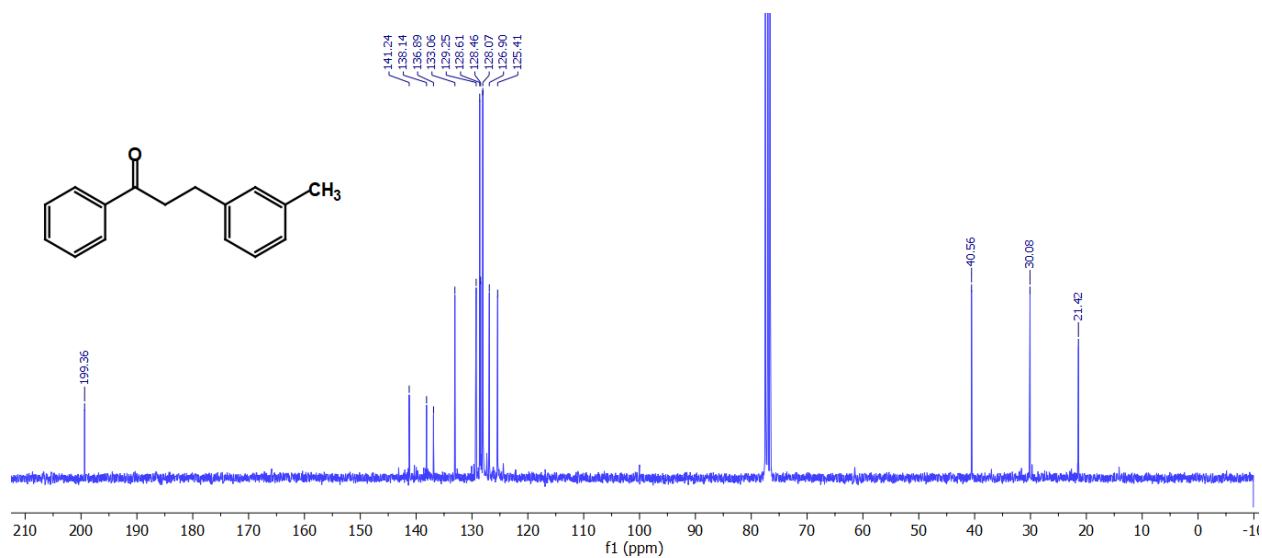

**Fig. S17** <sup>13</sup>C NMR spectrum of compound **5ac** (75 MHz, CDCl<sub>3</sub>).

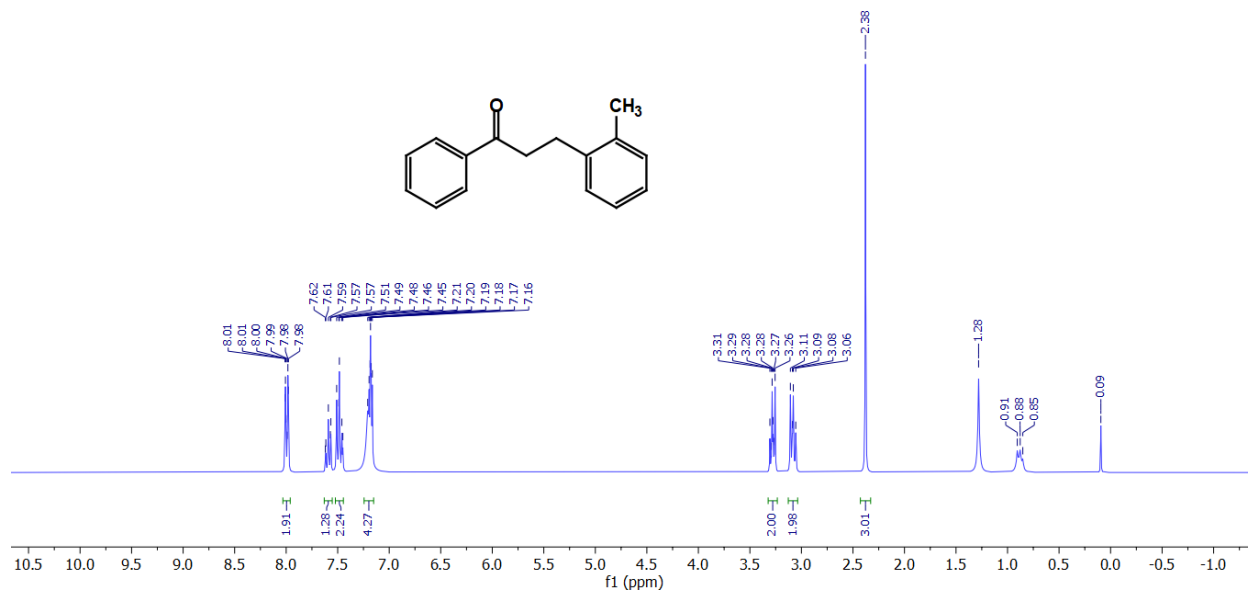

**Fig. S18** <sup>1</sup>H NMR spectrum of compound **5ad** (300 MHz, CDCl<sub>3</sub>).

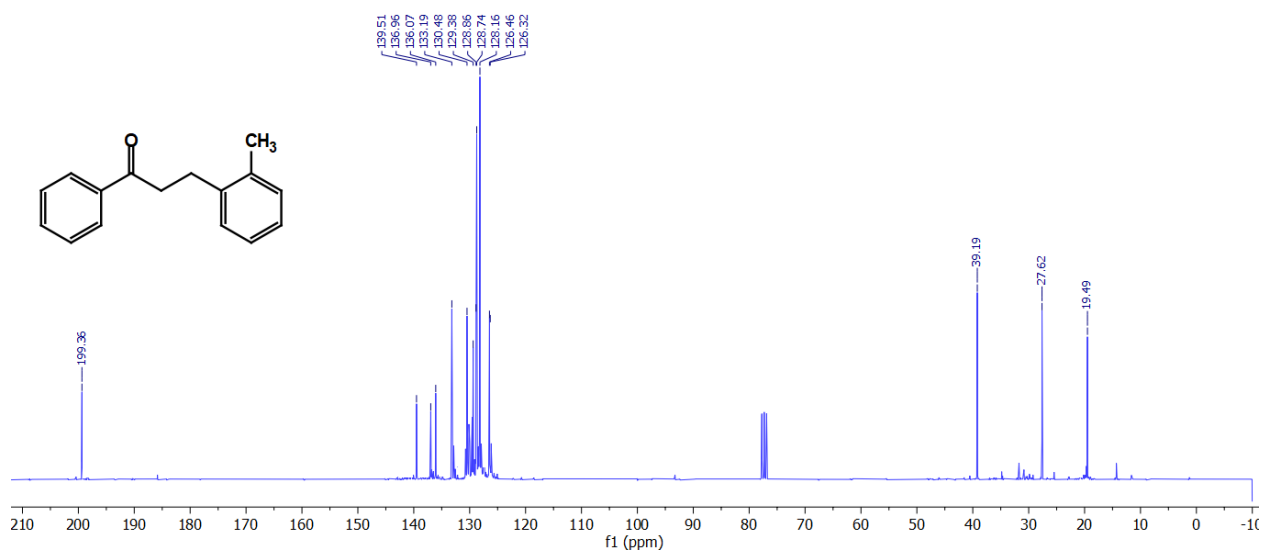

**Fig. S19** <sup>13</sup>C NMR spectrum of compound **5ad** (75 MHz, CDCl<sub>3</sub>).

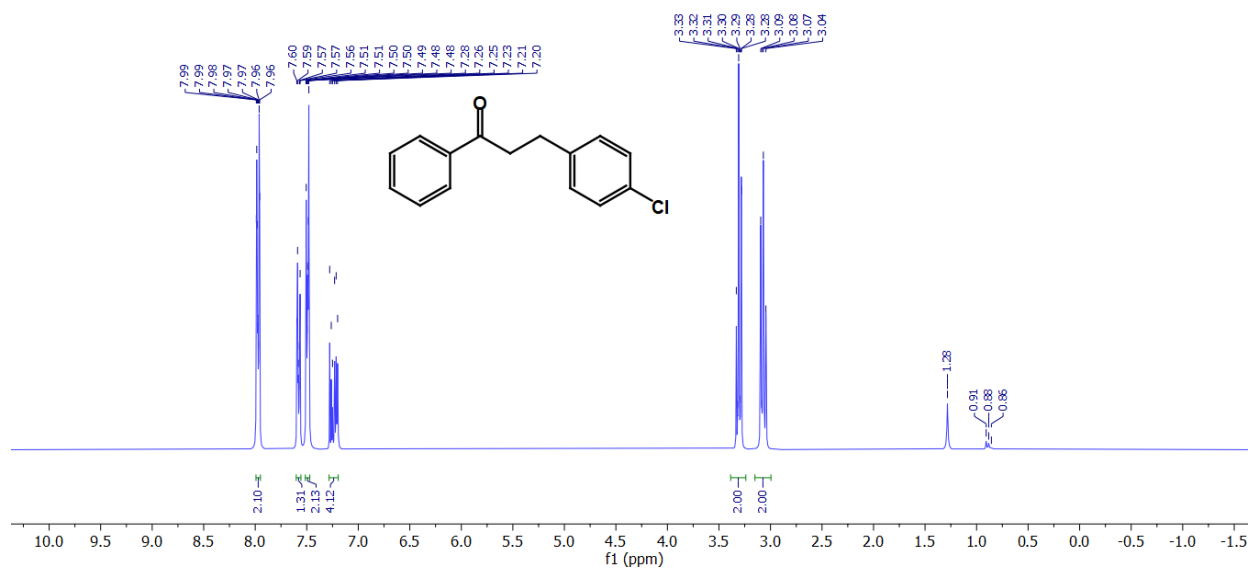

**Fig. S20** <sup>1</sup>H NMR spectrum of compound **5ae** (300 MHz, CDCl<sub>3</sub>).

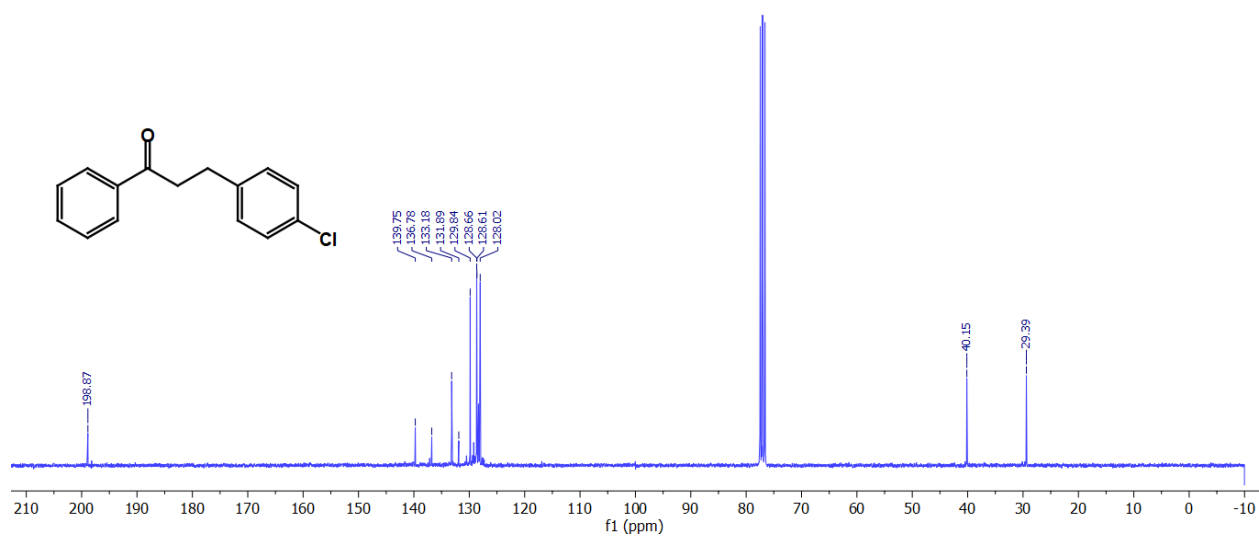

**Fig. S21** <sup>13</sup>C NMR spectrum of compound **5ae** (75 MHz, CDCl<sub>3</sub>).

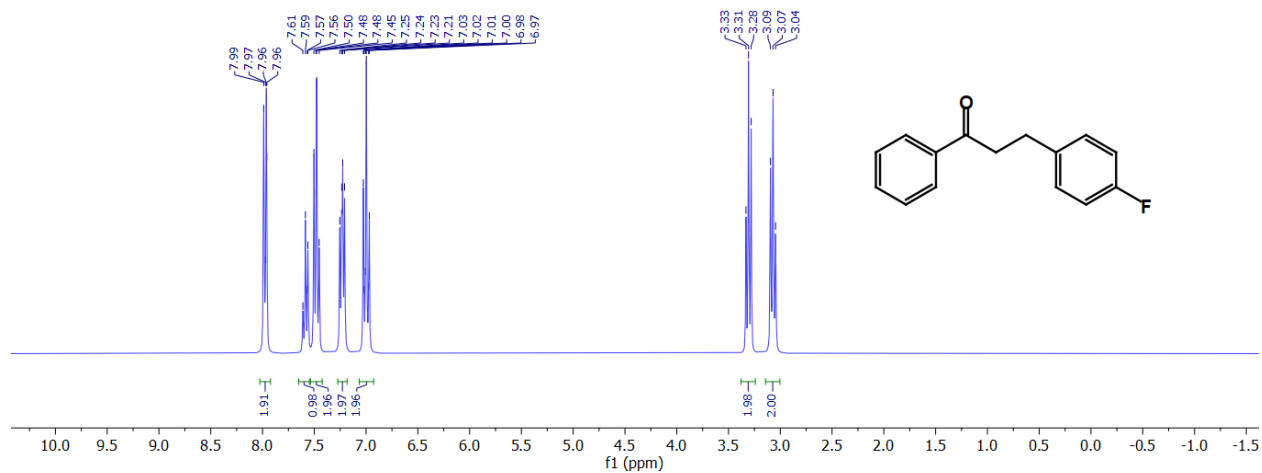

**Fig. S22**  $^1\text{H}$  NMR spectrum of compound **5af** (300 MHz,  $\text{CDCl}_3$ ).

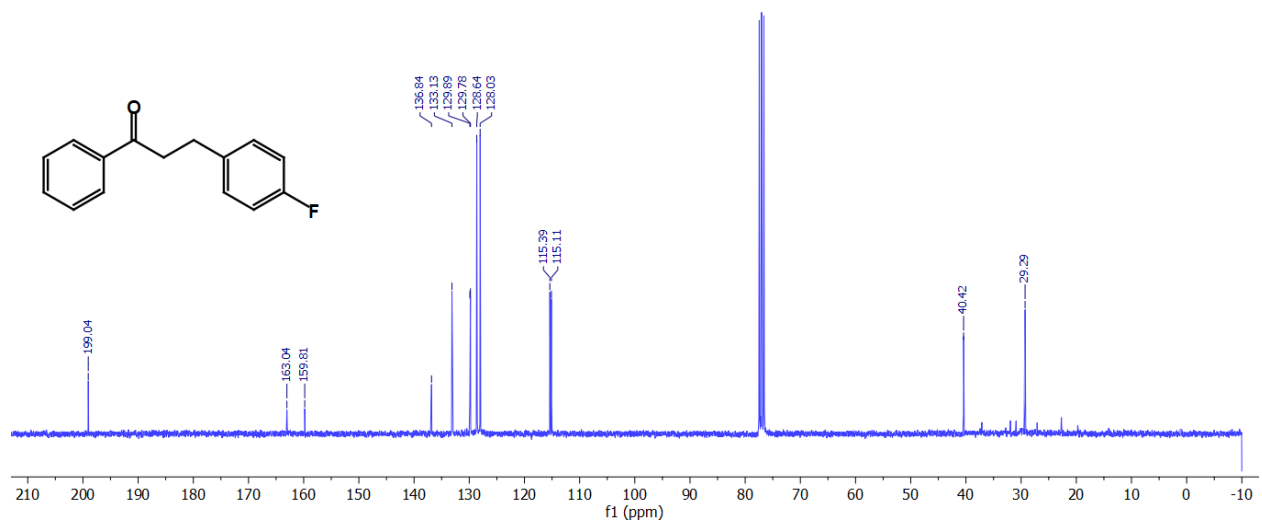

**Fig. S23**  $^{13}\text{C}$  NMR spectrum of compound **5af** (75 MHz,  $\text{CDCl}_3$ ).

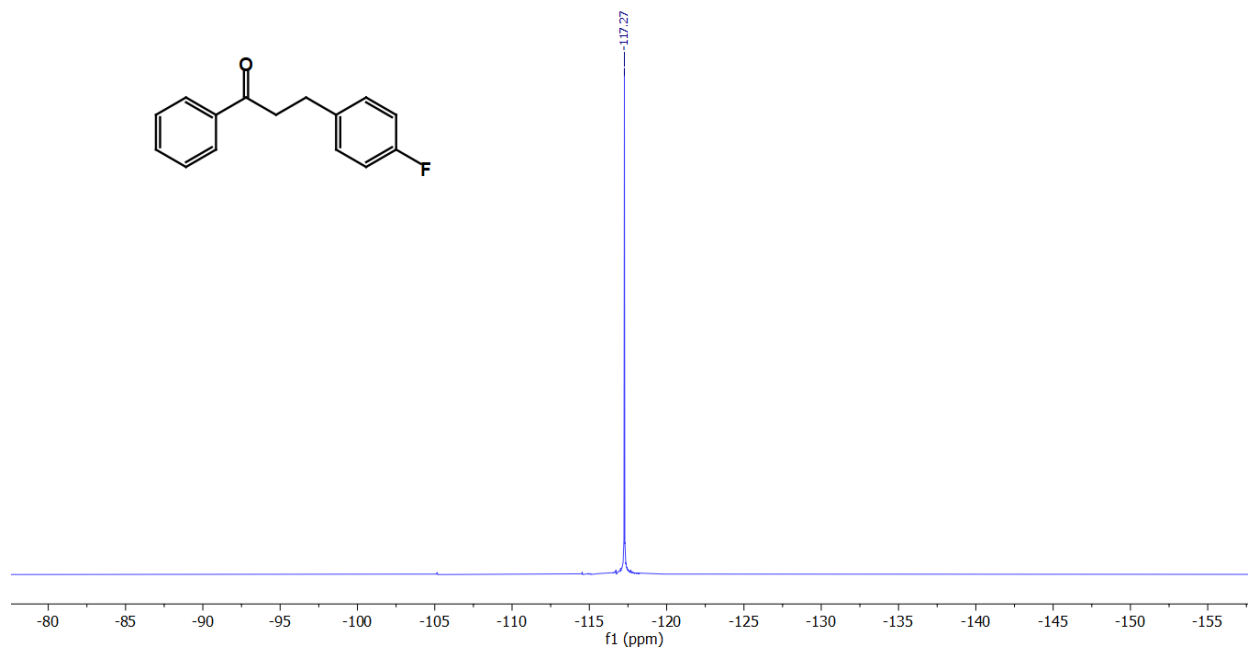

**Fig. S24**  $^{19}\text{F}$  NMR spectrum of compound **5af** (282 MHz,  $\text{CDCl}_3$ ).

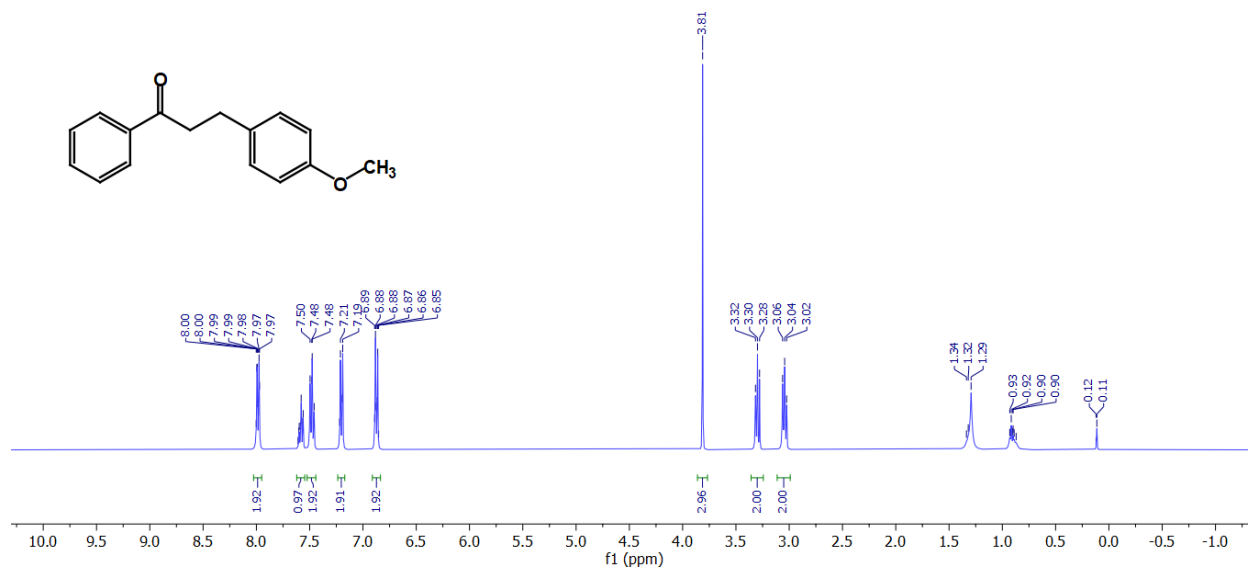

**Fig. S25**  $^1\text{H}$  NMR spectrum of compound **5ag** (300 MHz,  $\text{CDCl}_3$ ).

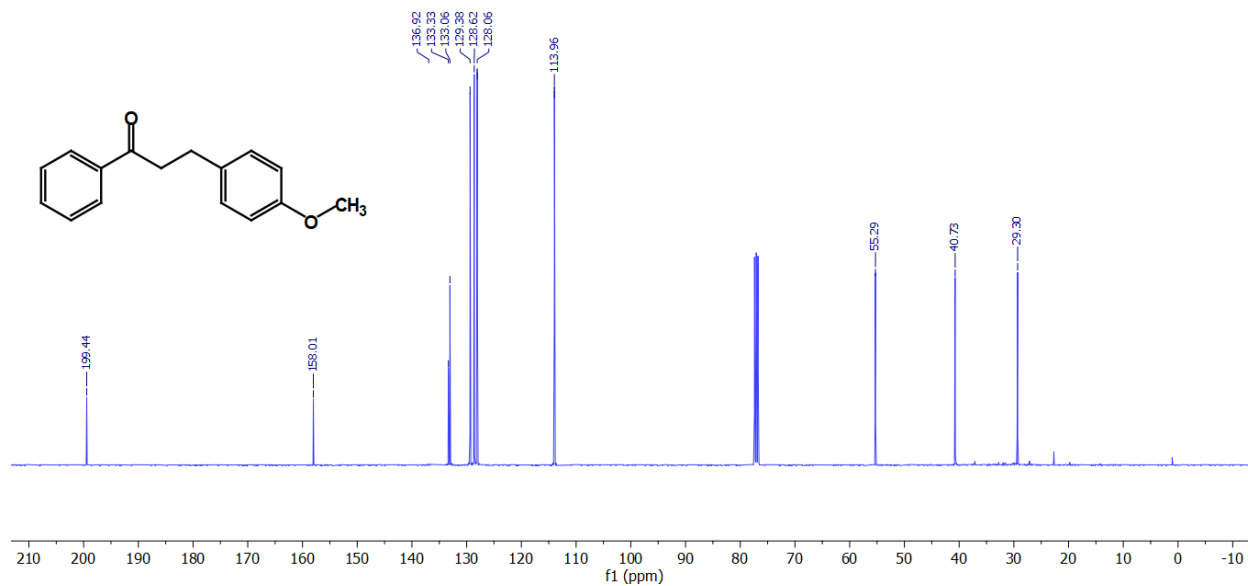

**Fig. S26**  $^{13}\text{C}$  NMR spectrum of compound **5ag** (75 MHz,  $\text{CDCl}_3$ ).

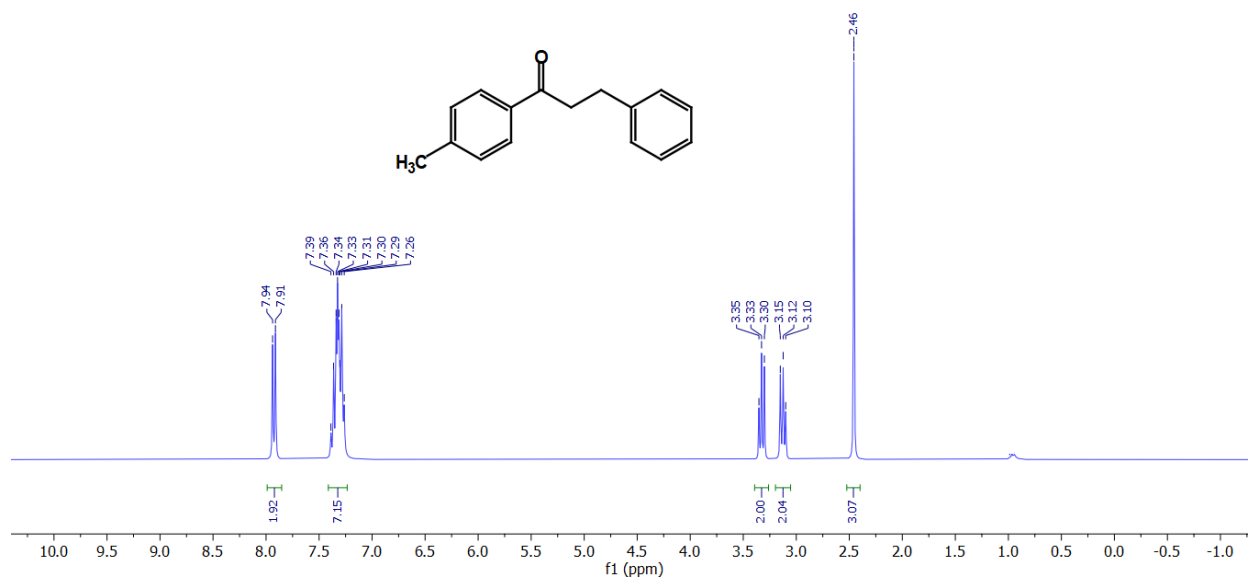

**Fig. S27**  $^1\text{H}$  NMR spectrum of compound **5ah** (300 MHz,  $\text{CDCl}_3$ ).

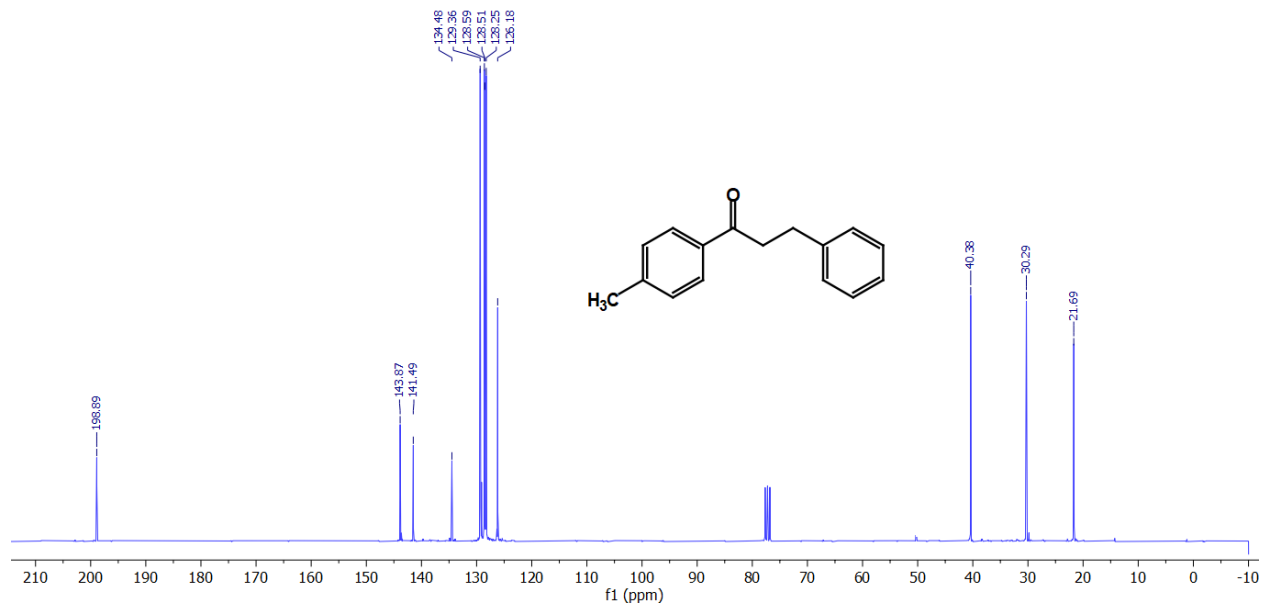

**Fig. S28**  $^{13}\text{C}$  NMR spectrum of compound **5ah** (75 MHz,  $\text{CDCl}_3$ ).

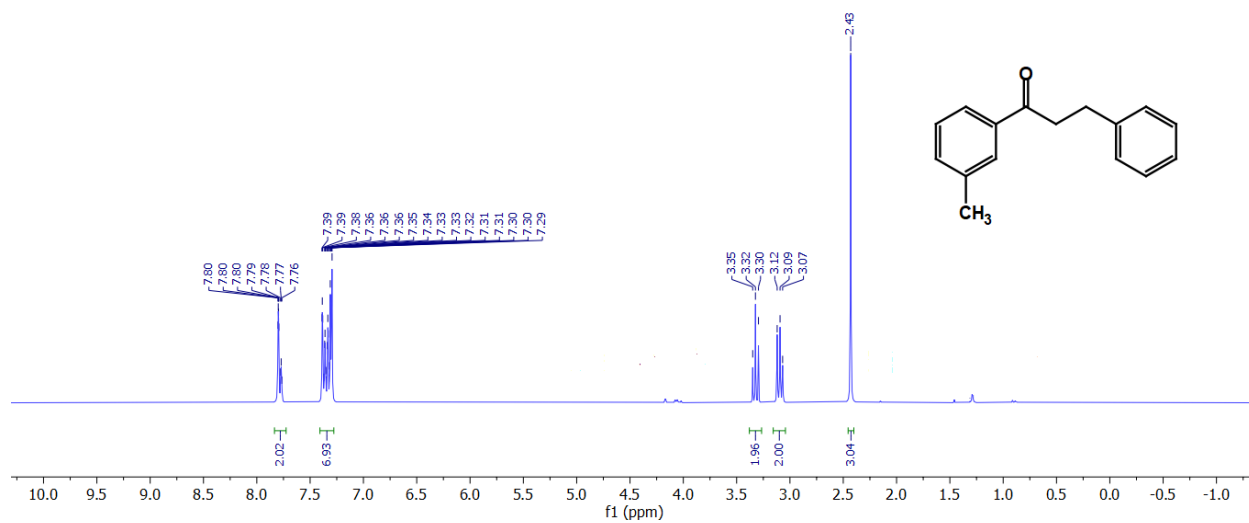

**Fig. S29**  $^1\text{H}$  NMR spectrum of compound **5ai** (300 MHz,  $\text{CDCl}_3$ ).

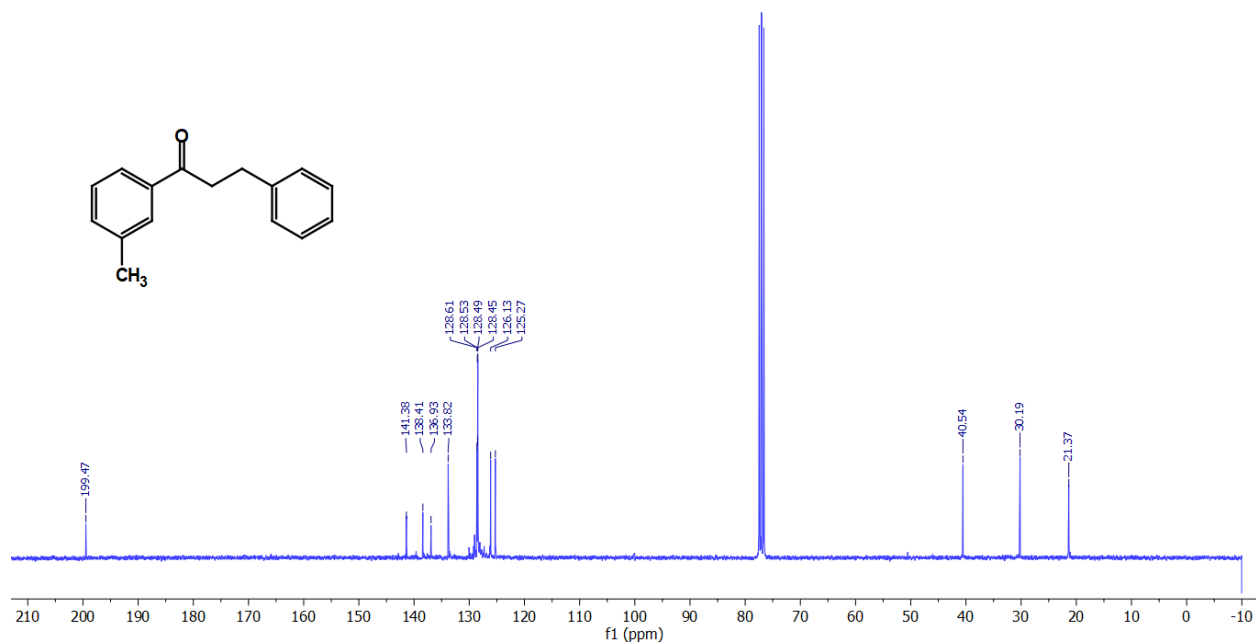

**Fig. S30**  $^{13}\text{C}$  NMR spectrum of compound **5ai** (75 MHz,  $\text{CDCl}_3$ ).

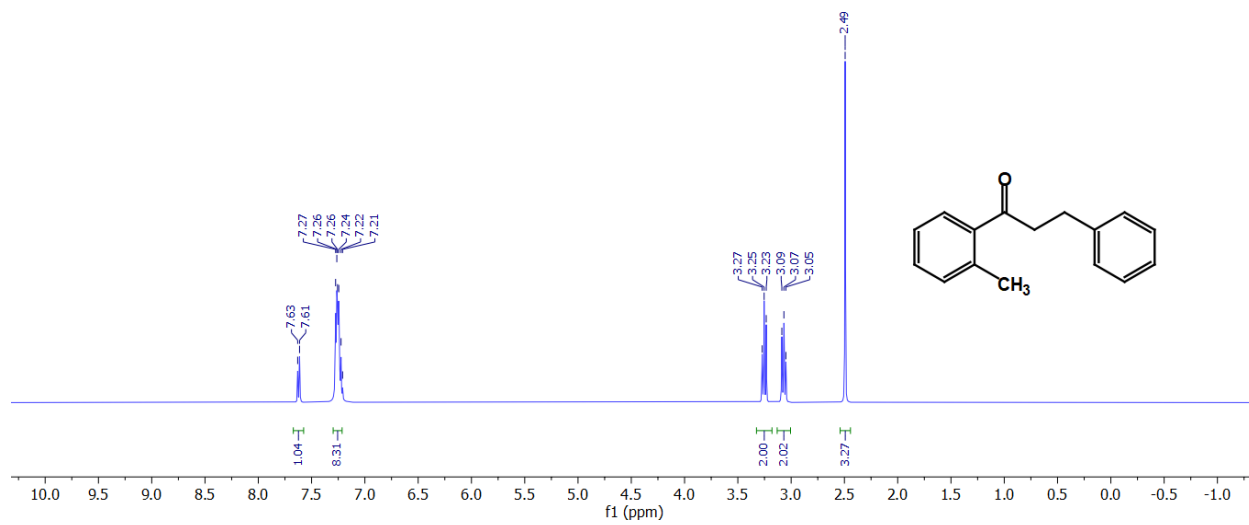

**Fig. S31**  $^1\text{H}$  NMR spectrum of compound **5aj** (300 MHz,  $\text{CDCl}_3$ ).



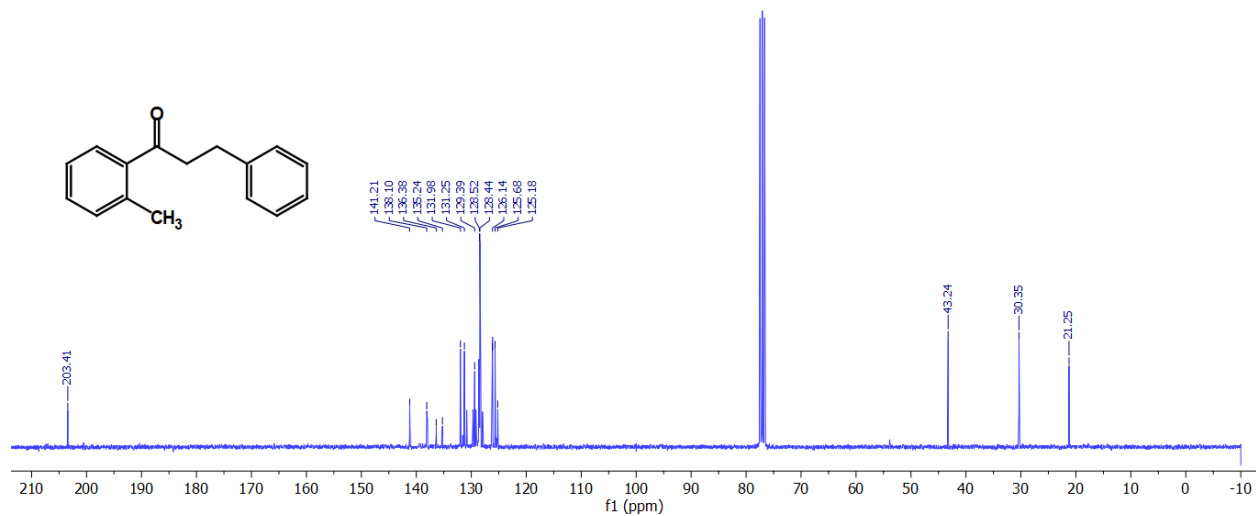

**Fig. S32**  $^{13}\text{C}$  NMR spectrum of compound **5aj** (75 MHz,  $\text{CDCl}_3$ ).

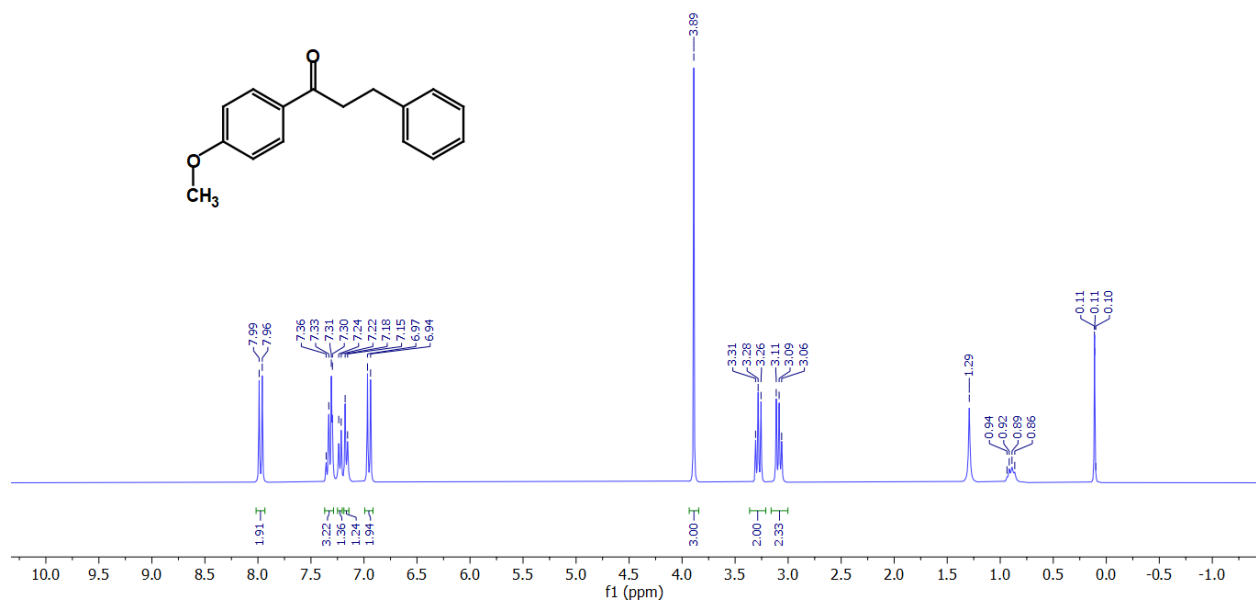

**Fig. S33**  $^1\text{H}$  NMR spectrum of compound **5ak** (300 MHz,  $\text{CDCl}_3$ ).

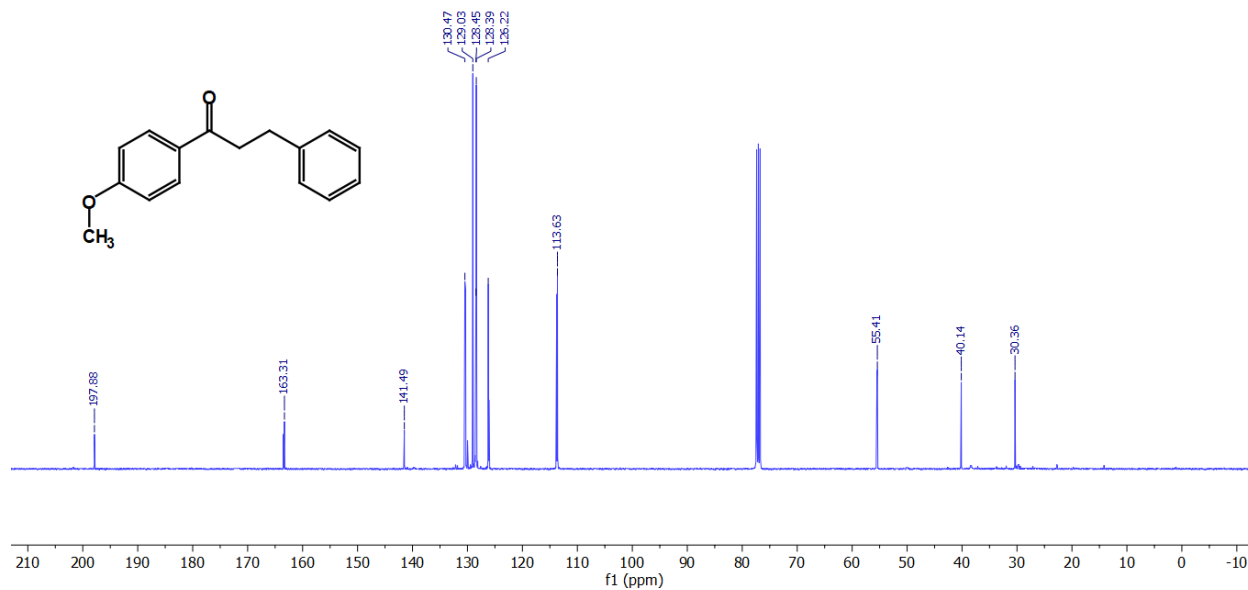

**Fig. S34** <sup>13</sup>C NMR spectrum of compound **5ak** (75 MHz, CDCl<sub>3</sub>).

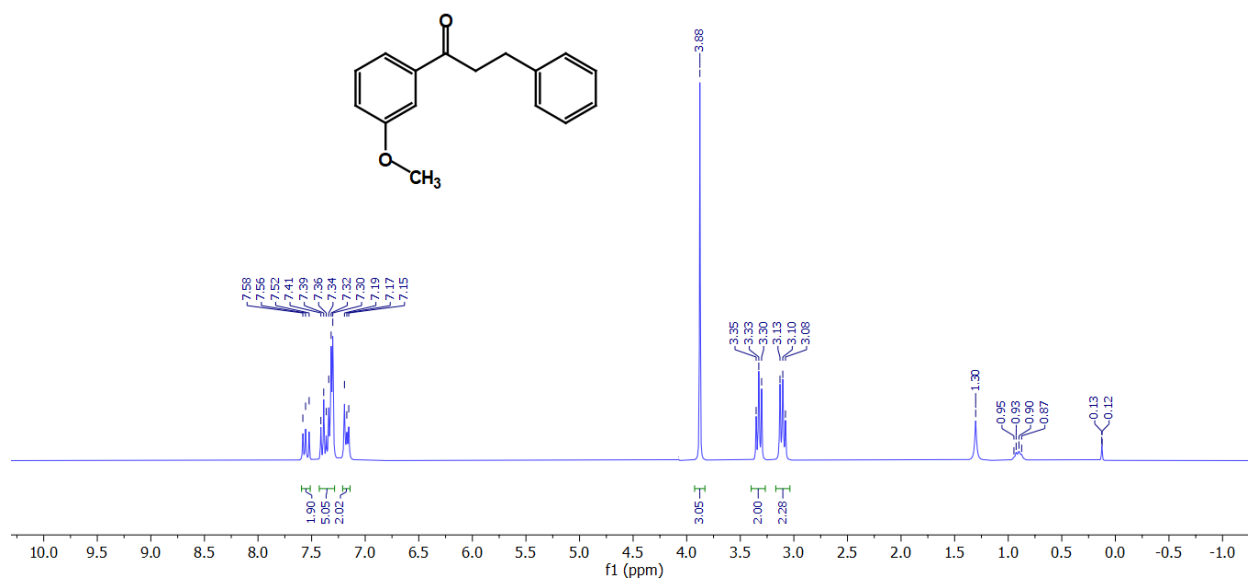

**Fig. S35** <sup>1</sup>H NMR spectrum of compound **5al** (300 MHz, CDCl<sub>3</sub>).

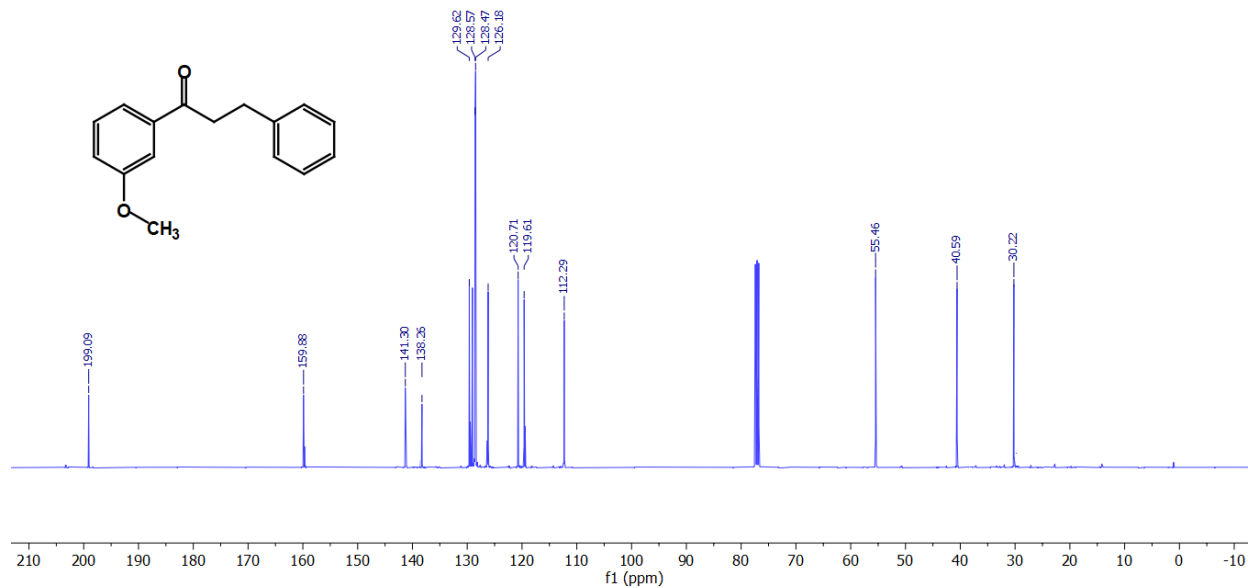

**Fig. S36**  $^{13}\text{C}$  NMR spectrum of compound **5al** (75 MHz,  $\text{CDCl}_3$ ).

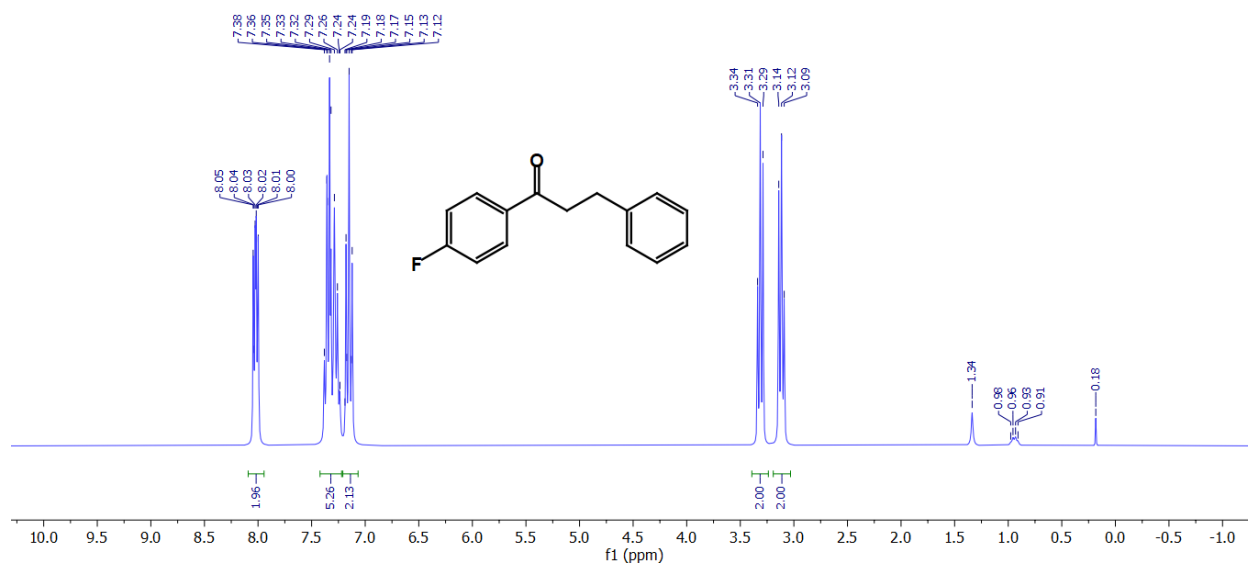

**Fig. S37**  $^1\text{H}$  NMR spectrum of compound **5am** (300 MHz,  $\text{CDCl}_3$ ).

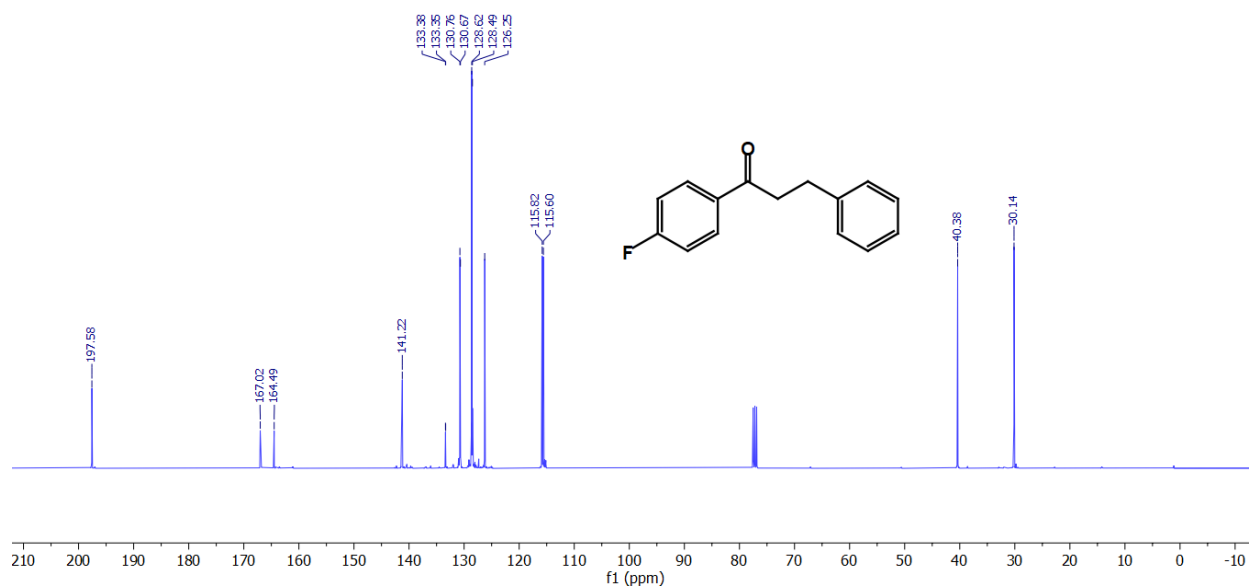

**Fig. S38**  $^{13}\text{C}$  NMR spectrum of compound **5am** (75 MHz,  $\text{CDCl}_3$ ).

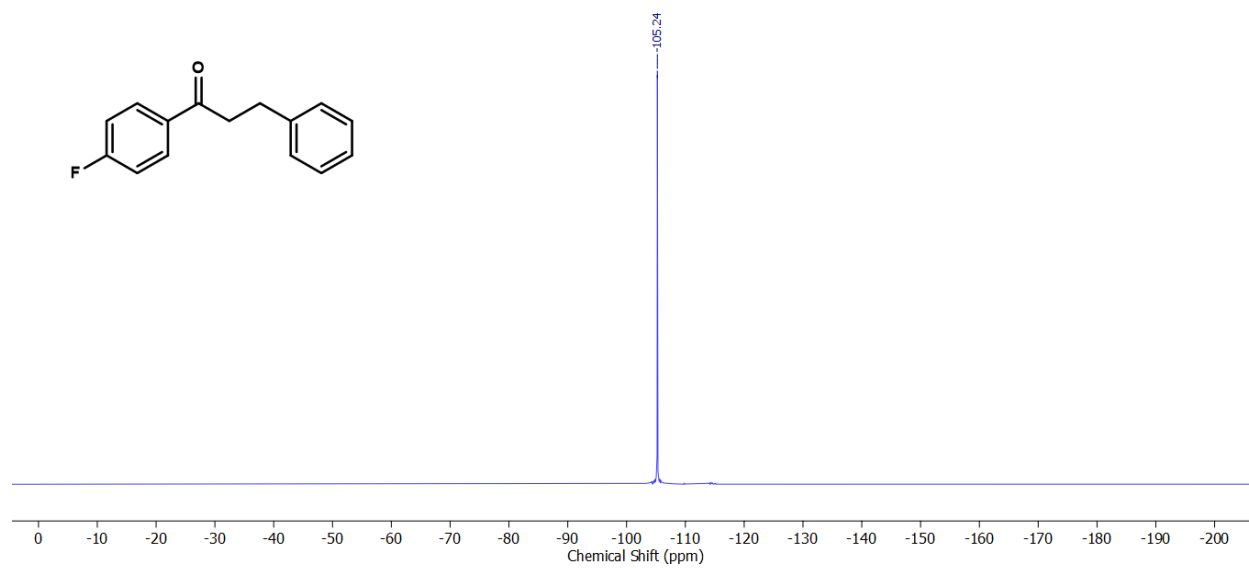

**Fig. S39**  $^{19}\text{F}$  NMR spectrum of compound **5am** (282 MHz,  $\text{CDCl}_3$ ).

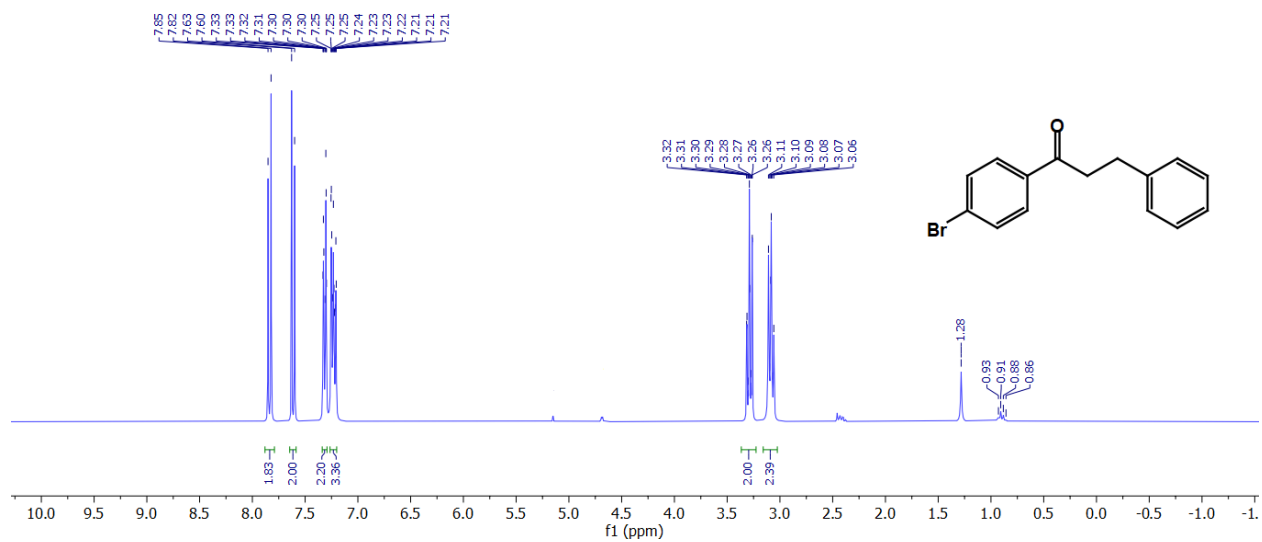

**Fig. S40** <sup>1</sup>H NMR spectrum of compound **5an** (300 MHz, CDCl<sub>3</sub>).

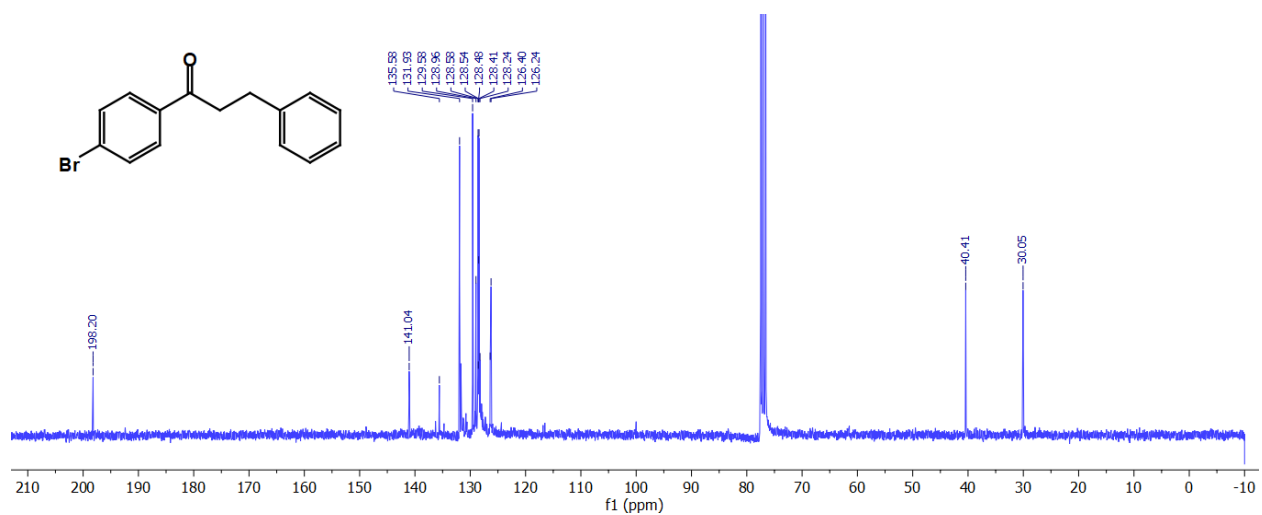

**Fig. S41** <sup>13</sup>C NMR spectrum of compound **5an** (75 MHz, CDCl<sub>3</sub>).

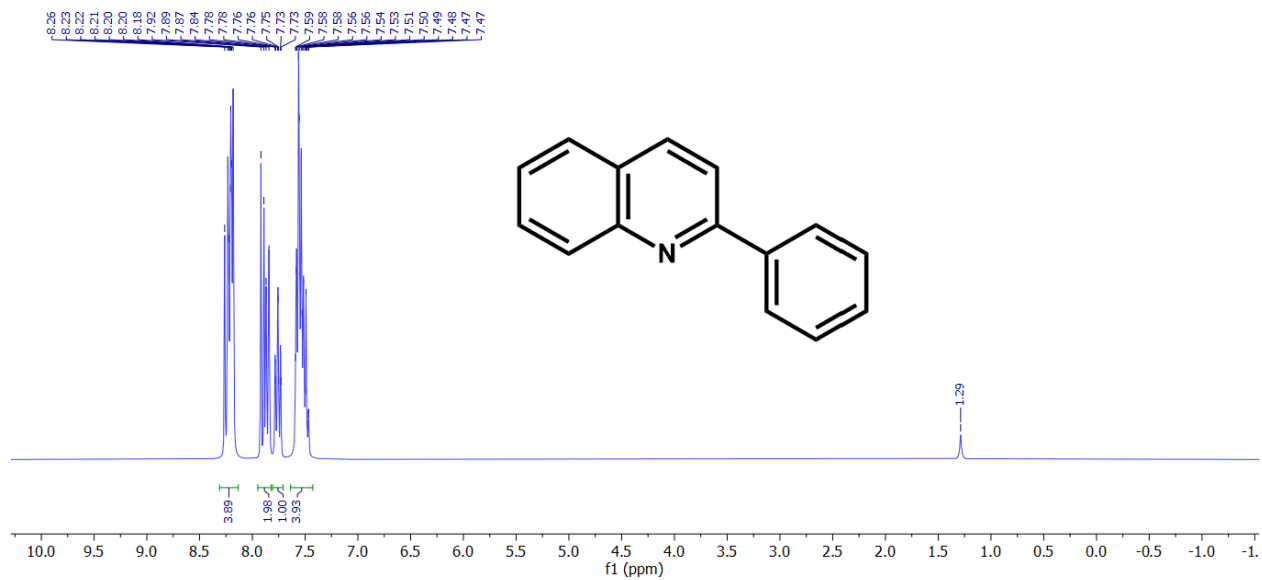

**Fig. S42**  $^1\text{H}$  NMR spectrum of compound **9aa** (300 MHz,  $\text{CDCl}_3$ ).

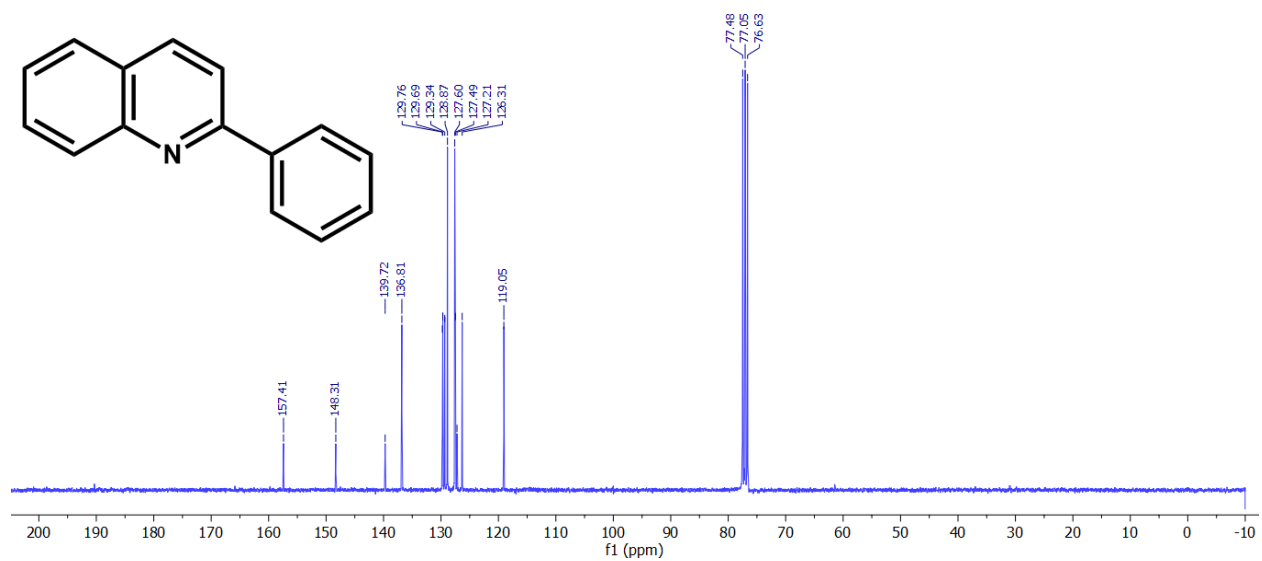

**Fig. S43**  $^{13}\text{C}$  NMR spectrum of compound **9aa** (75 MHz,  $\text{CDCl}_3$ ).

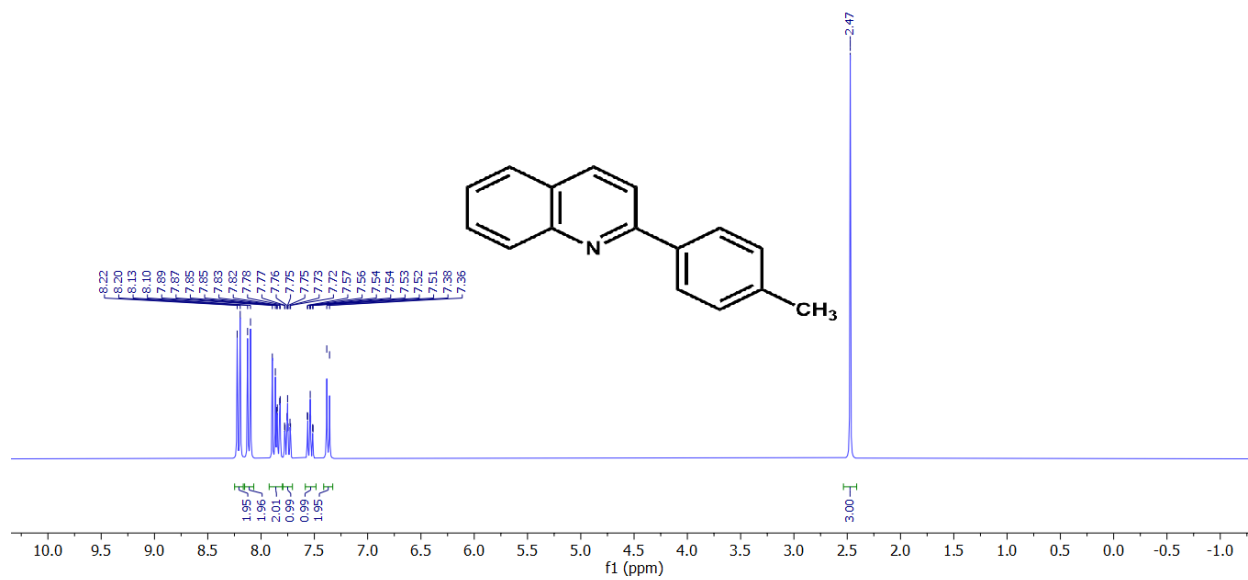

**Fig. S44**  $^1\text{H}$  NMR spectrum of compound **9ab** (300 MHz,  $\text{CDCl}_3$ ).

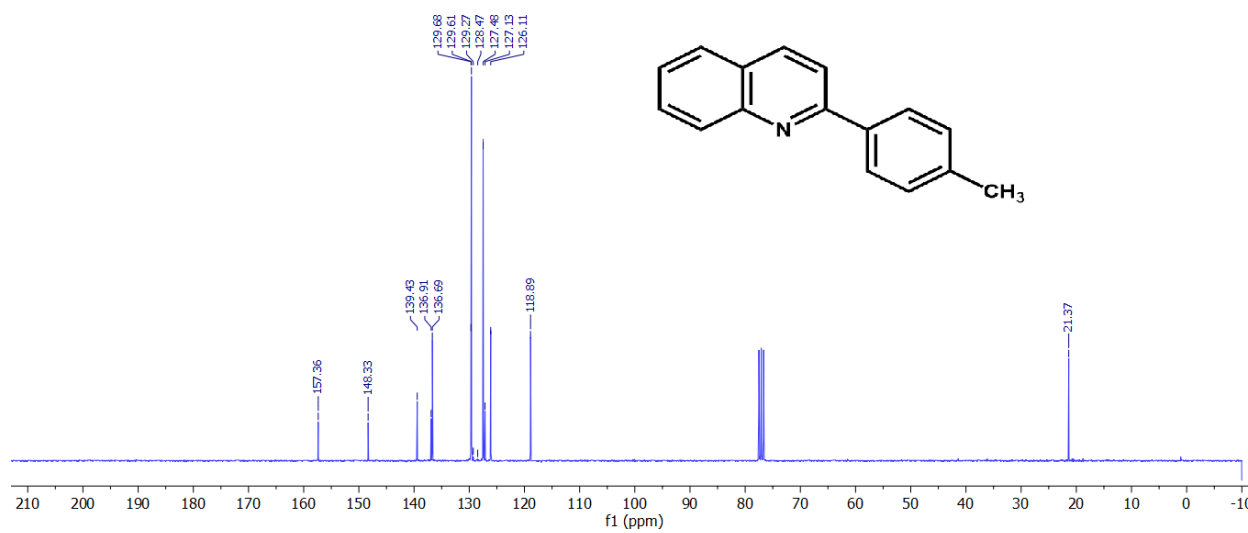

**Fig. S45**  $^{13}\text{C}$  NMR spectrum of compound **9ab** (75 MHz,  $\text{CDCl}_3$ ).

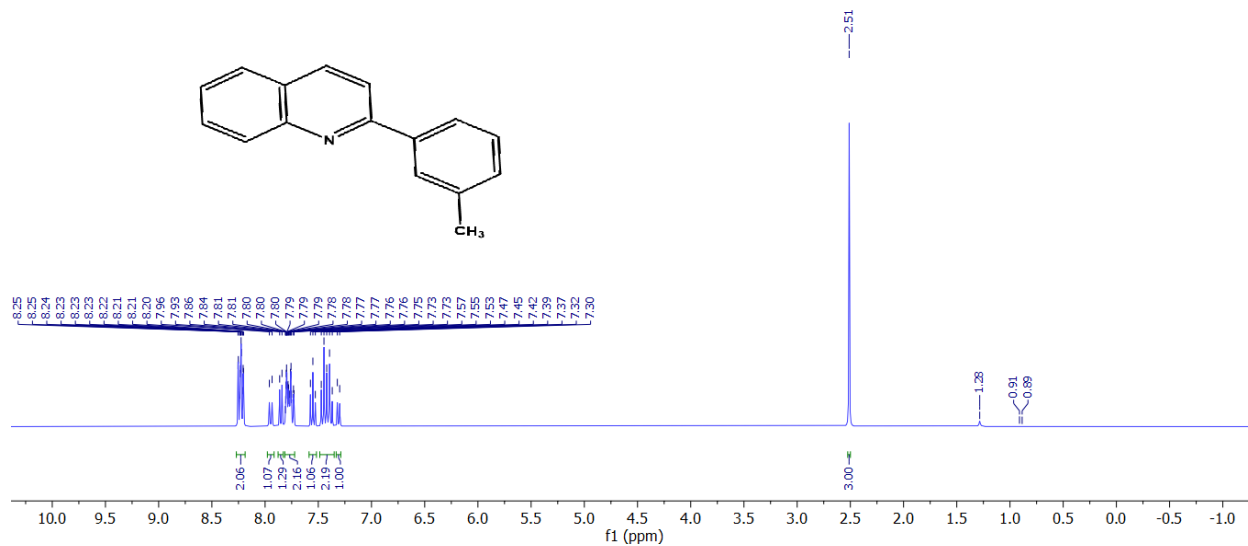

**Fig. S46** <sup>1</sup>H NMR spectrum of compound **9ac** (300 MHz, CDCl<sub>3</sub>).

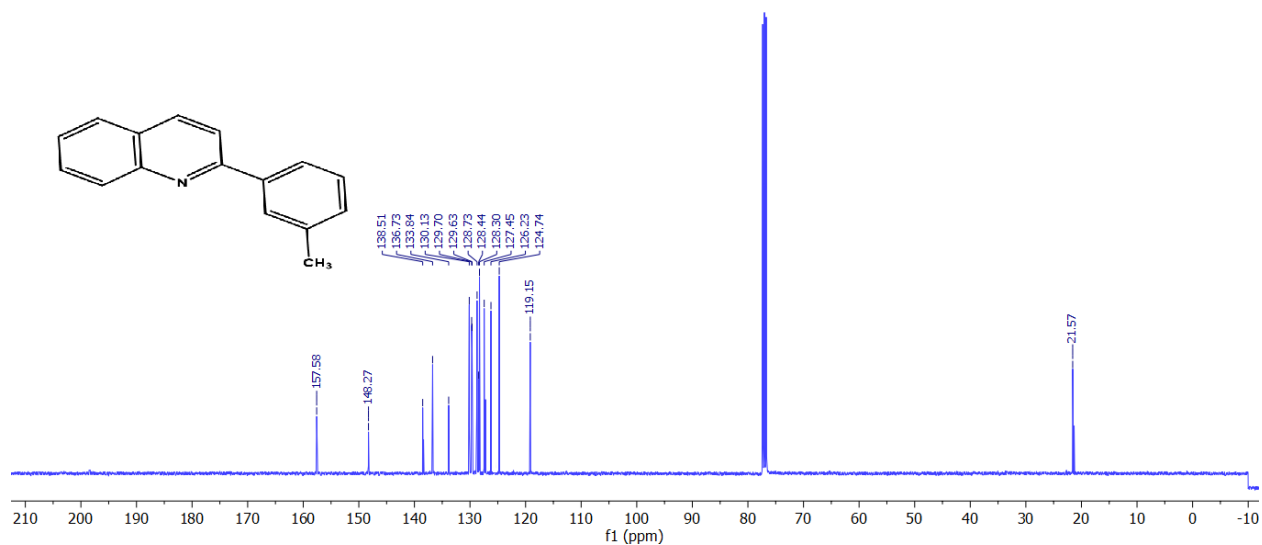

**Fig. S47** <sup>13</sup>C NMR spectrum of compound **9ac** (75 MHz, CDCl<sub>3</sub>).



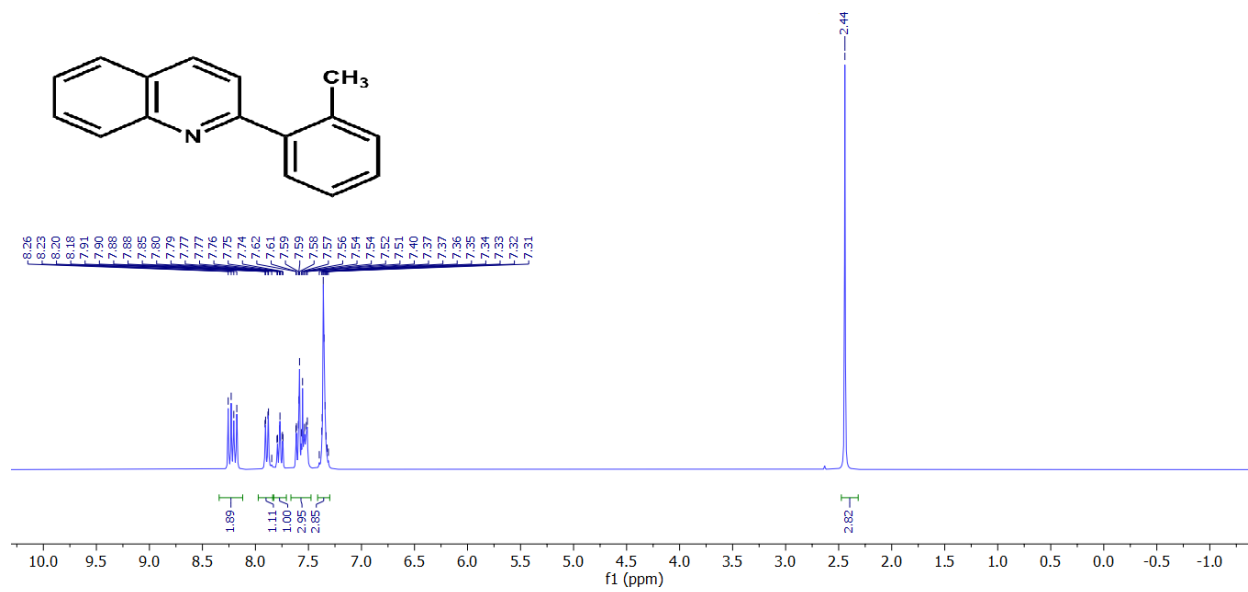

**Fig. S48** <sup>1</sup>H NMR spectrum of compound **9ad** (300 MHz, CDCl<sub>3</sub>).

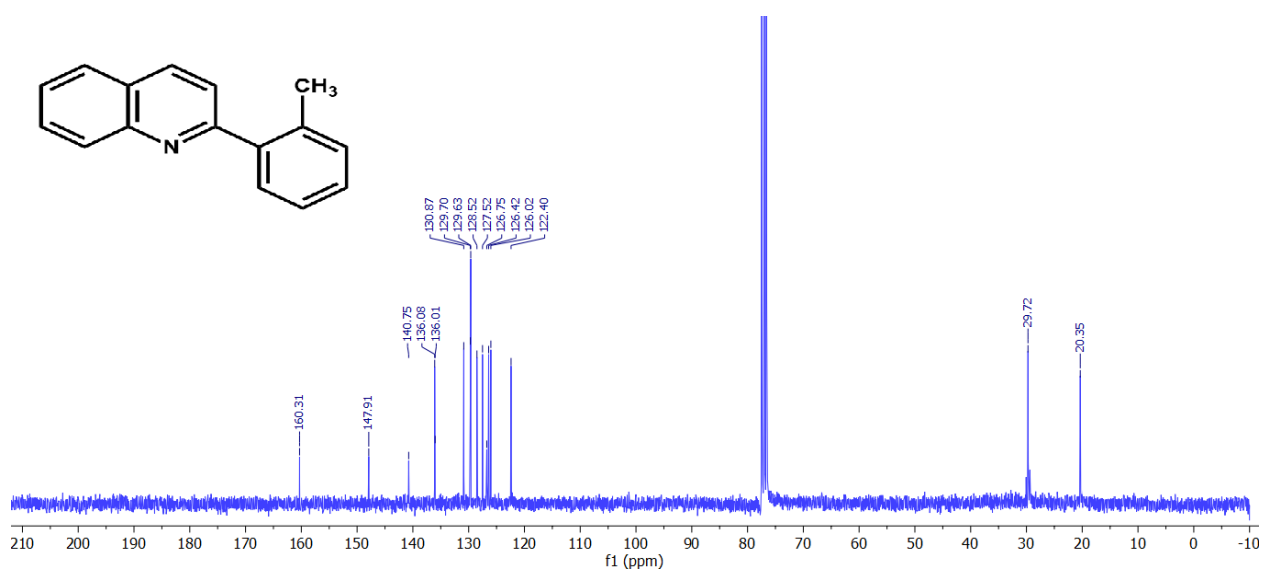

**Fig. S49** <sup>13</sup>C NMR spectrum of compound **9ad** (75 MHz, CDCl<sub>3</sub>).

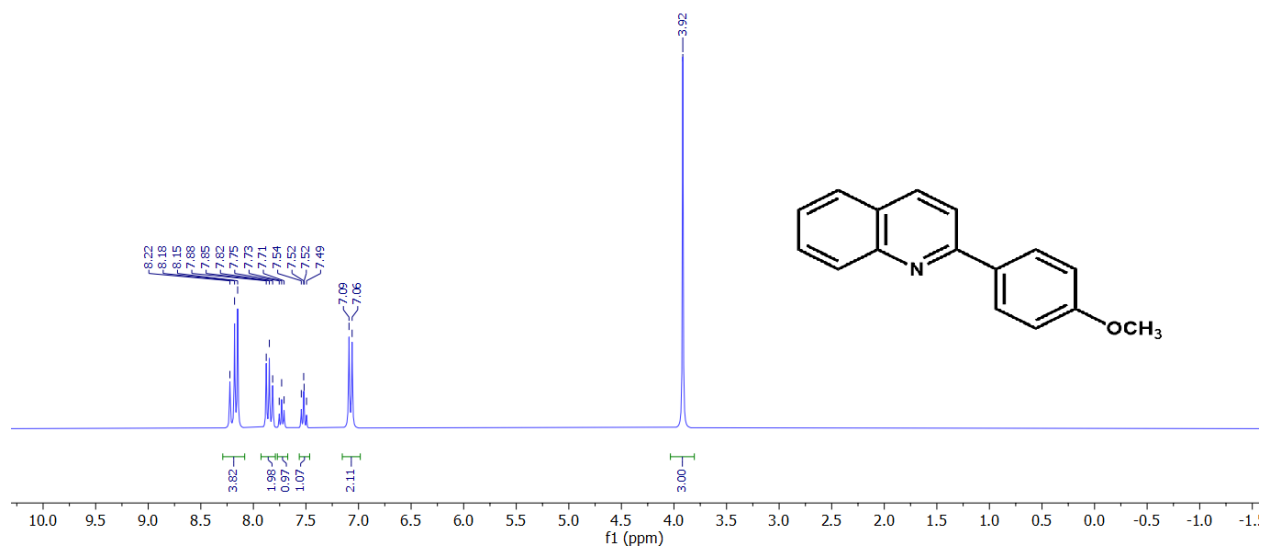

**Fig. S50** <sup>1</sup>H NMR spectrum of compound **9ae** (300 MHz, CDCl<sub>3</sub>).

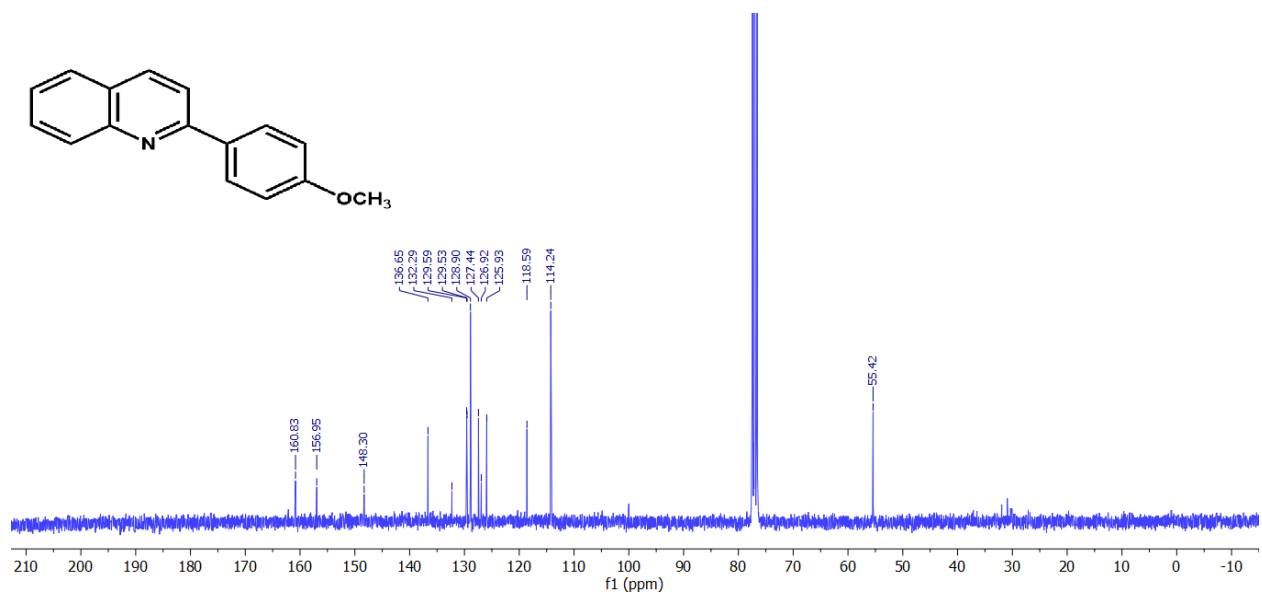

**Fig. S51** <sup>13</sup>C NMR spectrum of compound **9ae** (75 MHz, CDCl<sub>3</sub>).

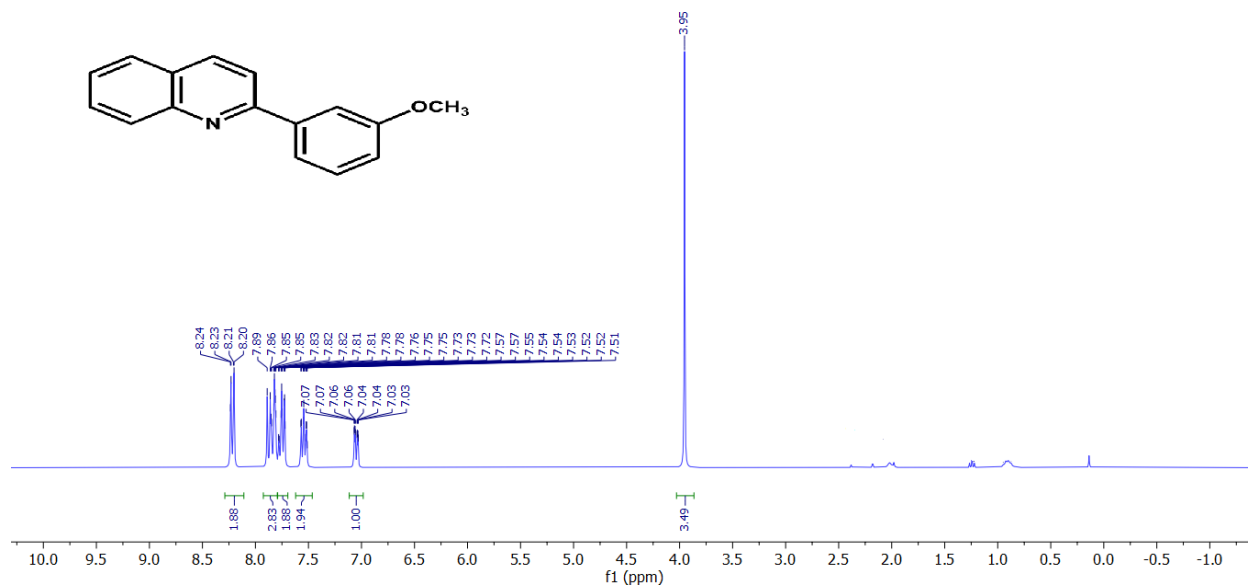

**Fig. S52** <sup>1</sup>H NMR spectrum of compound **9af** (300 MHz, CDCl<sub>3</sub>).

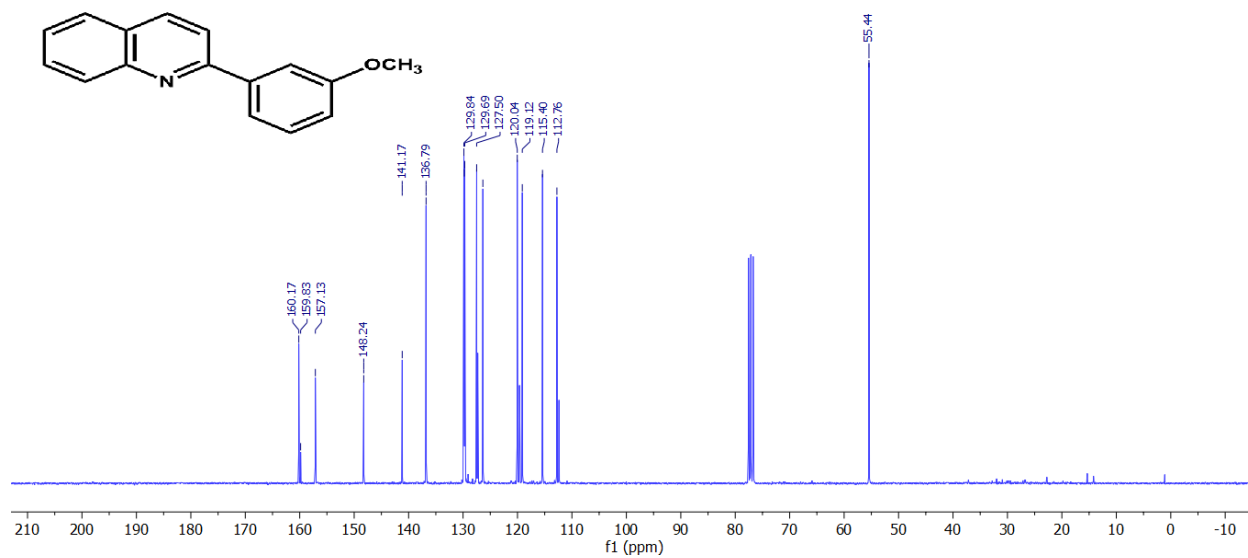

**Fig. S53** <sup>13</sup>C NMR spectrum of compound **9af** (75 MHz, CDCl<sub>3</sub>).

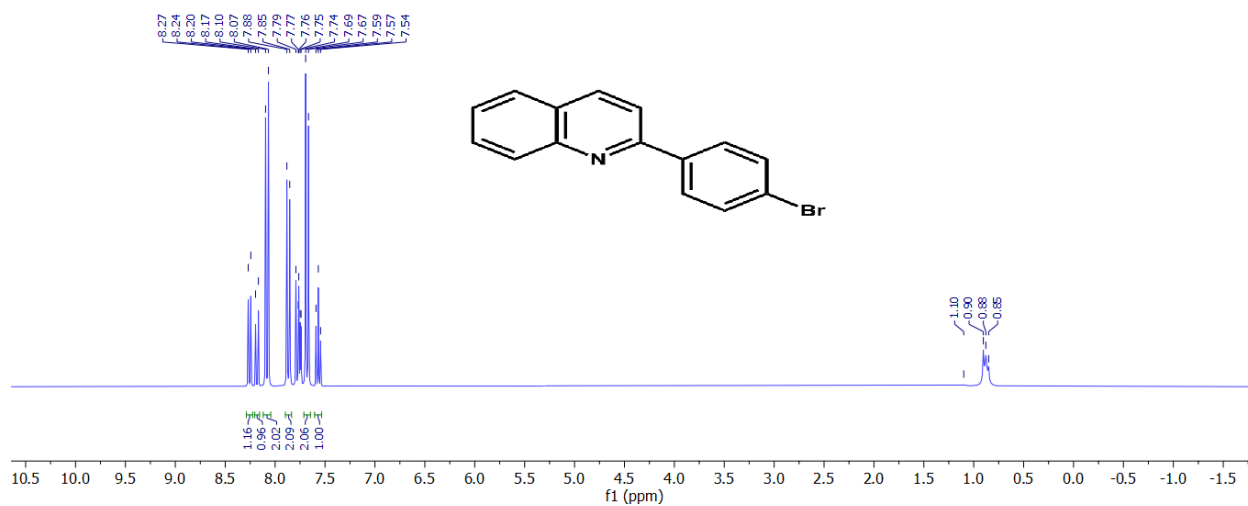

**Fig. S54**  $^1\text{H}$  NMR spectrum of compound **9ag** (300 MHz,  $\text{CDCl}_3$ ).

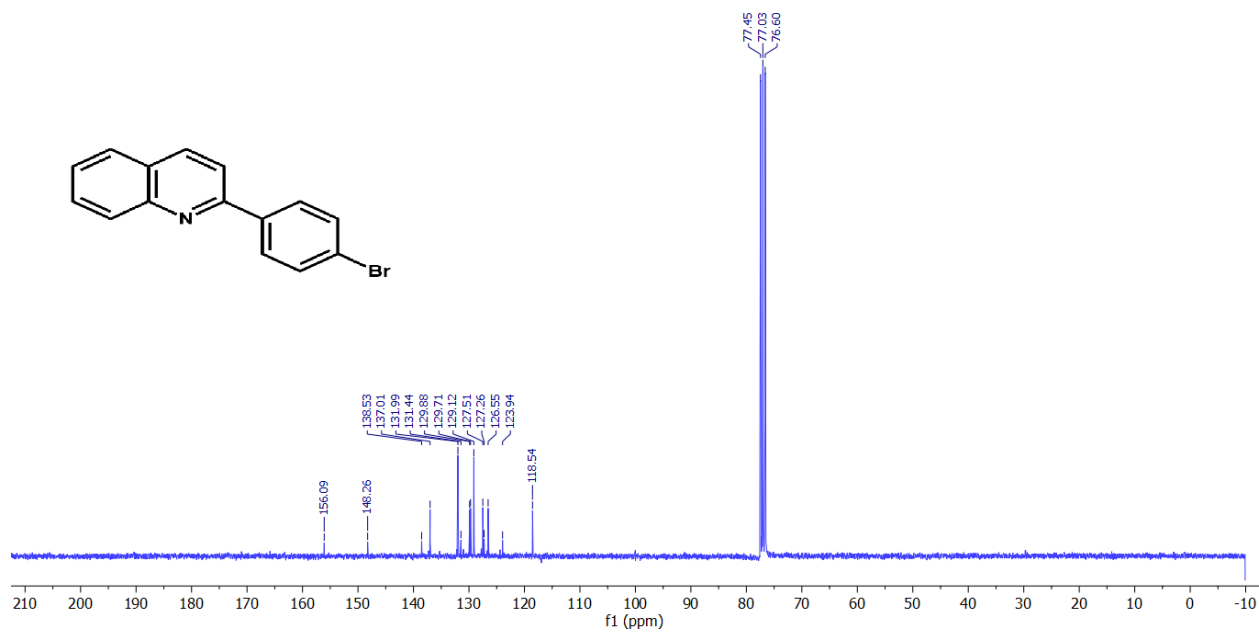

**Fig. S55**  $^{13}\text{C}$  NMR spectrum of compound **9ag** (75 MHz,  $\text{CDCl}_3$ ).

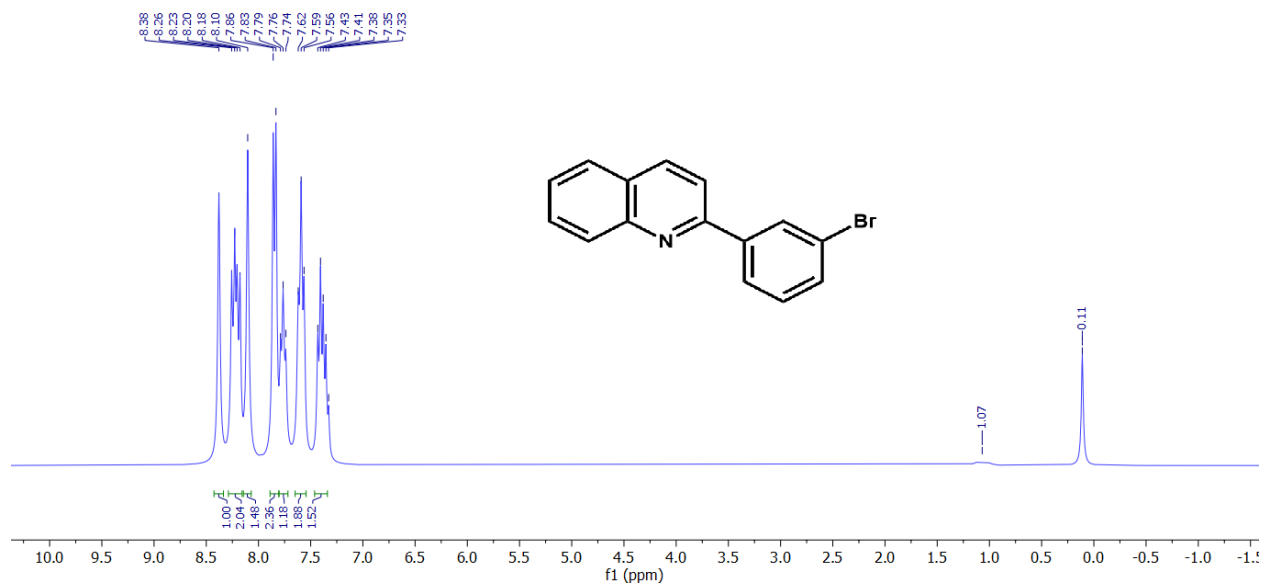

**Fig. S56** <sup>1</sup>H NMR spectrum of compound **9ah** (300 MHz, CDCl<sub>3</sub>).

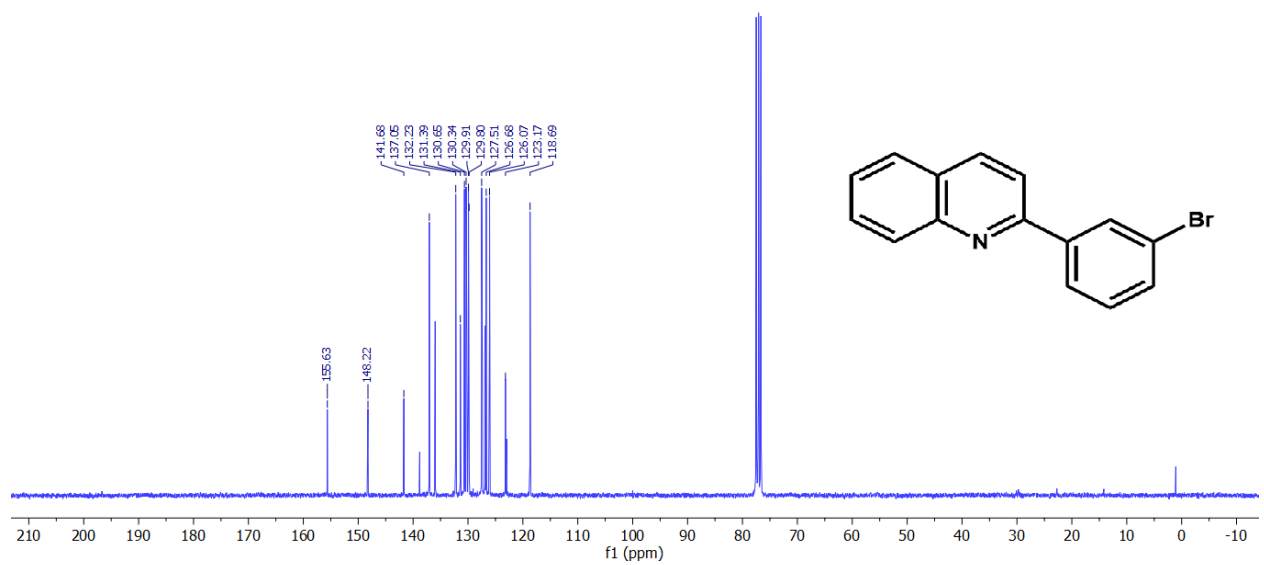

**Fig. S57** <sup>13</sup>C NMR spectrum of compound **9ah** (75 MHz, CDCl<sub>3</sub>).

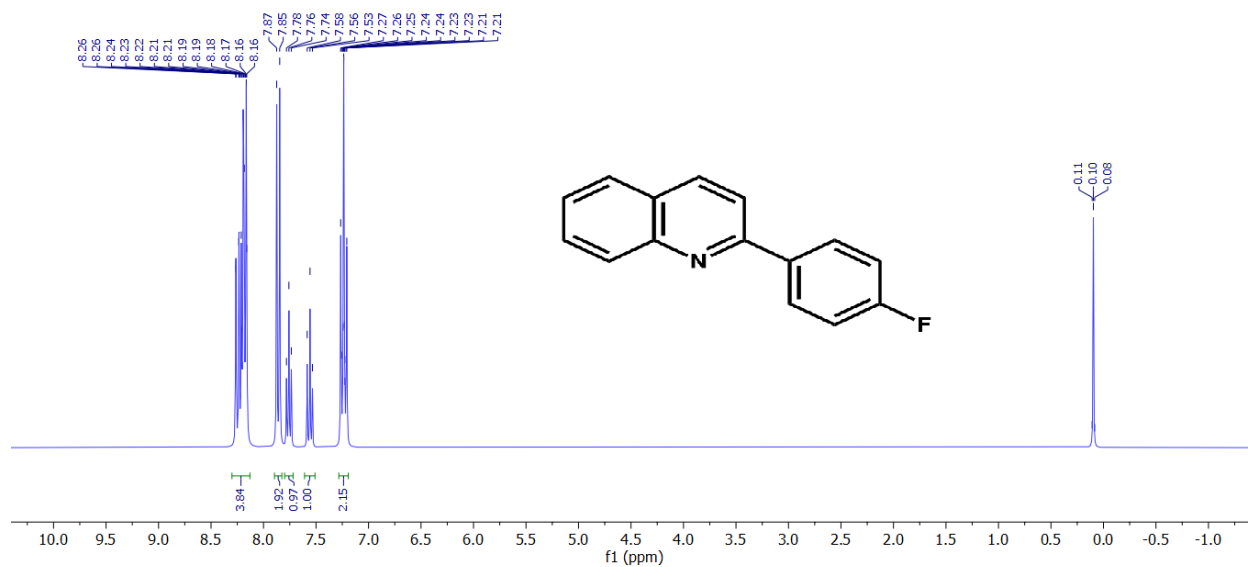

**Fig. S58**  $^1\text{H}$  NMR spectrum of compound **9ai** (300 MHz,  $\text{CDCl}_3$ ).

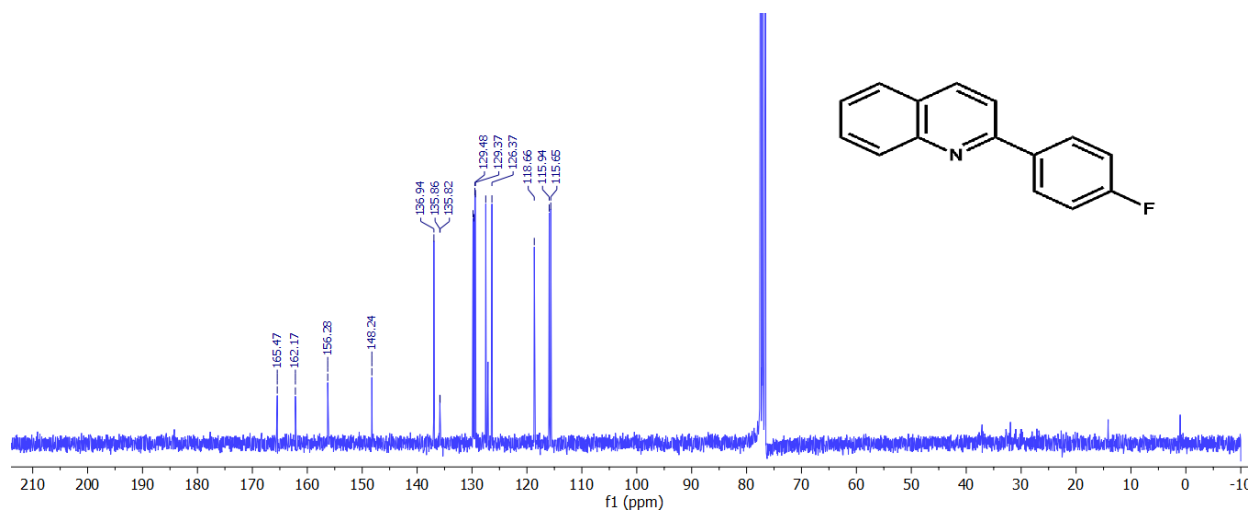

**Fig. S59**  $^{13}\text{C}$  NMR spectrum of compound **9ai** (75 MHz,  $\text{CDCl}_3$ ).

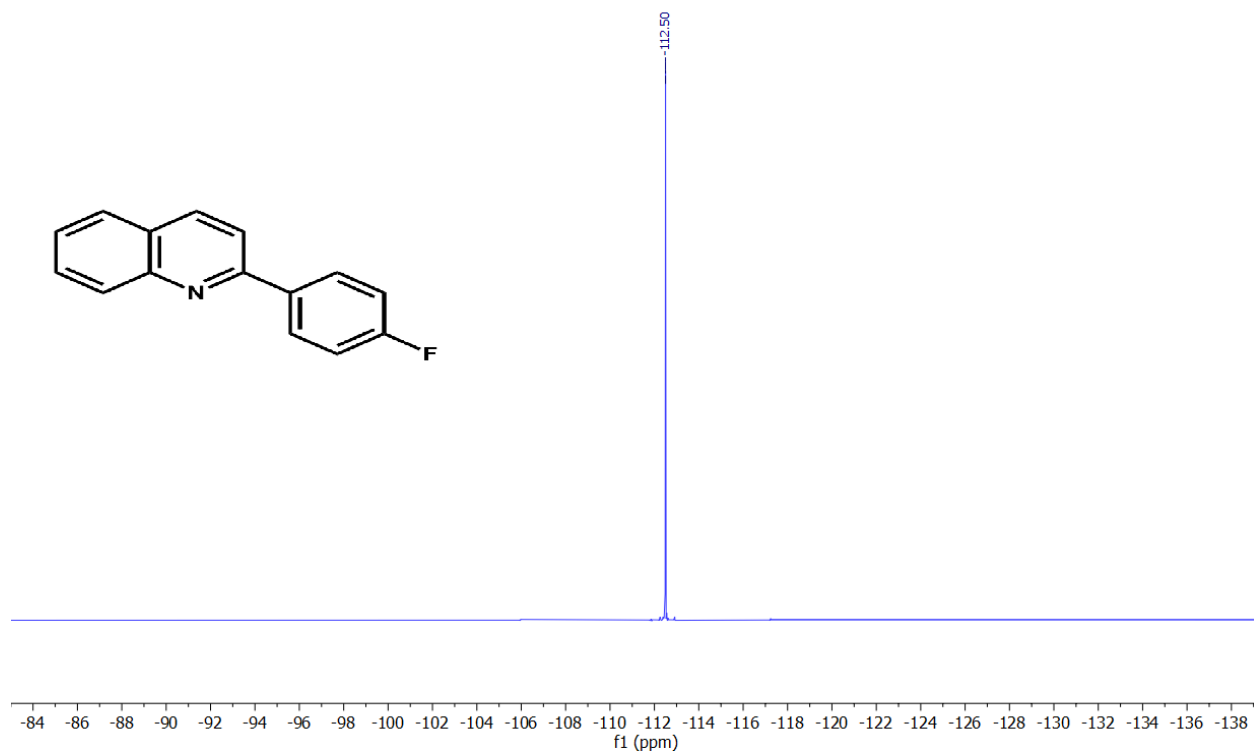

**Fig. S60**  $^{19}\text{F}$  NMR spectrum of compound **9ai** (282 MHz,  $\text{CDCl}_3$ ).

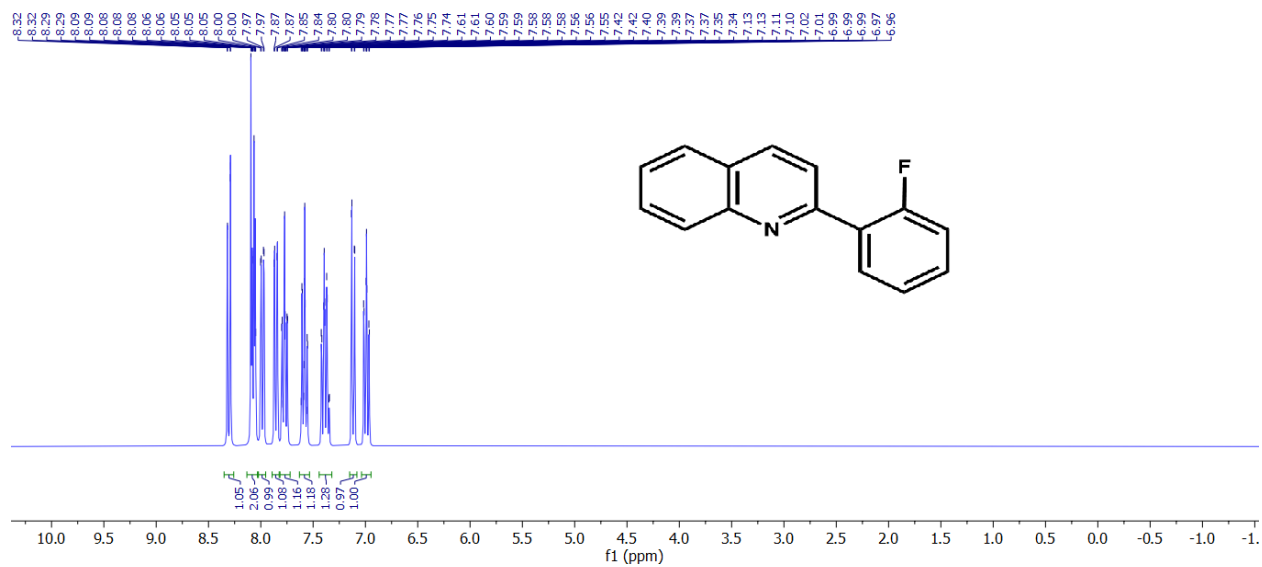

**Fig. S61**  $^1\text{H}$  NMR spectrum of compound **9aj** (300 MHz,  $\text{CDCl}_3$ ).

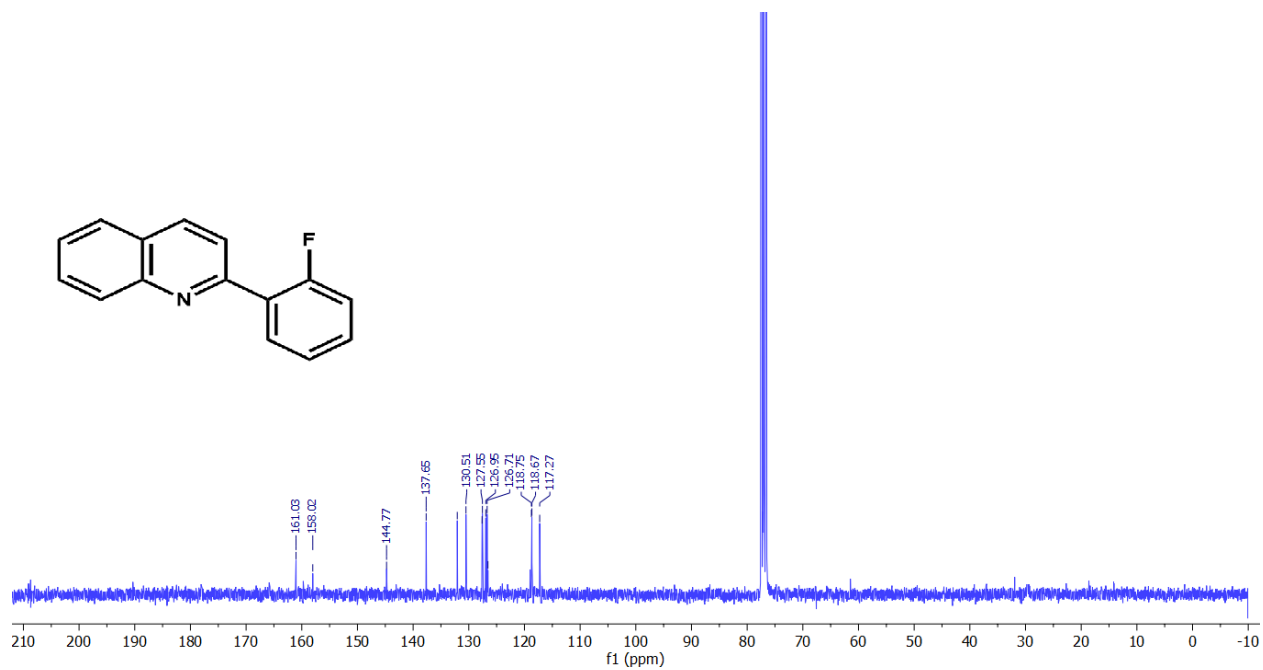

**Fig. S62** <sup>13</sup>C NMR spectrum of compound **9aj** (75 MHz, CDCl<sub>3</sub>).

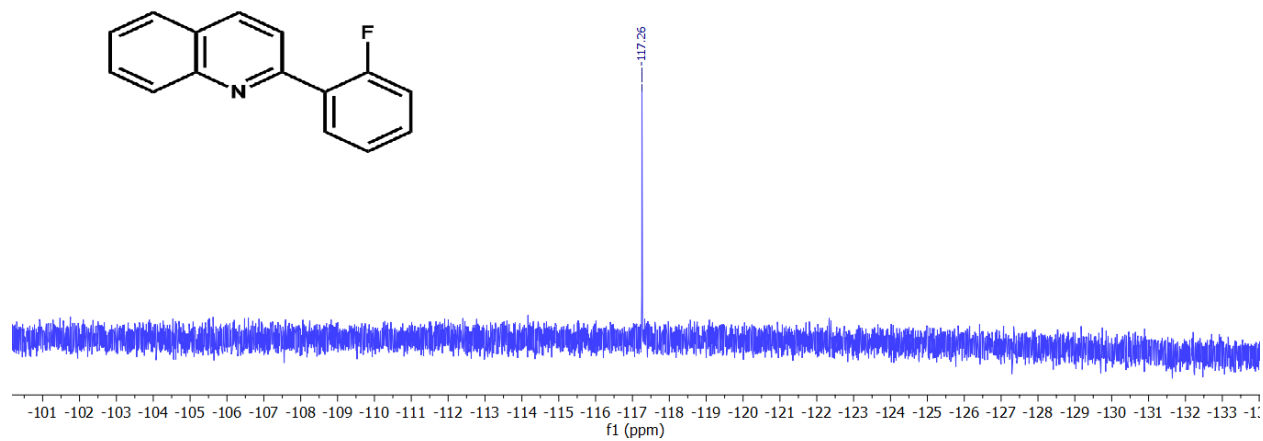

**Fig. S63** <sup>19</sup>F NMR spectrum of compound **9aj** (282 MHz, CDCl<sub>3</sub>).



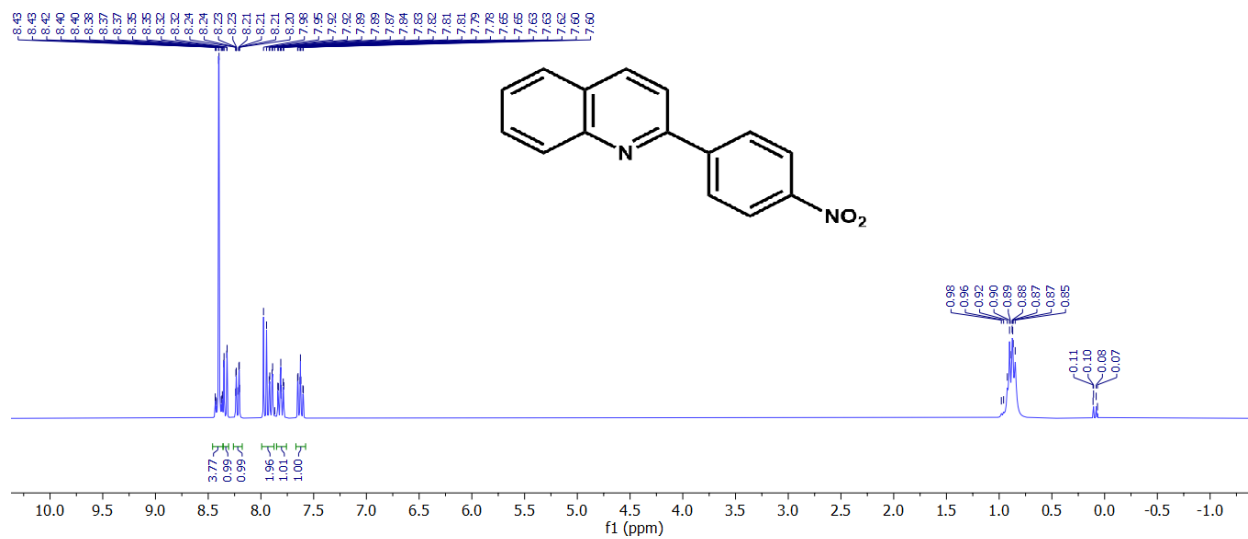

**Fig. S64** <sup>1</sup>H NMR spectrum of compound **9ak** (300 MHz, CDCl<sub>3</sub>).

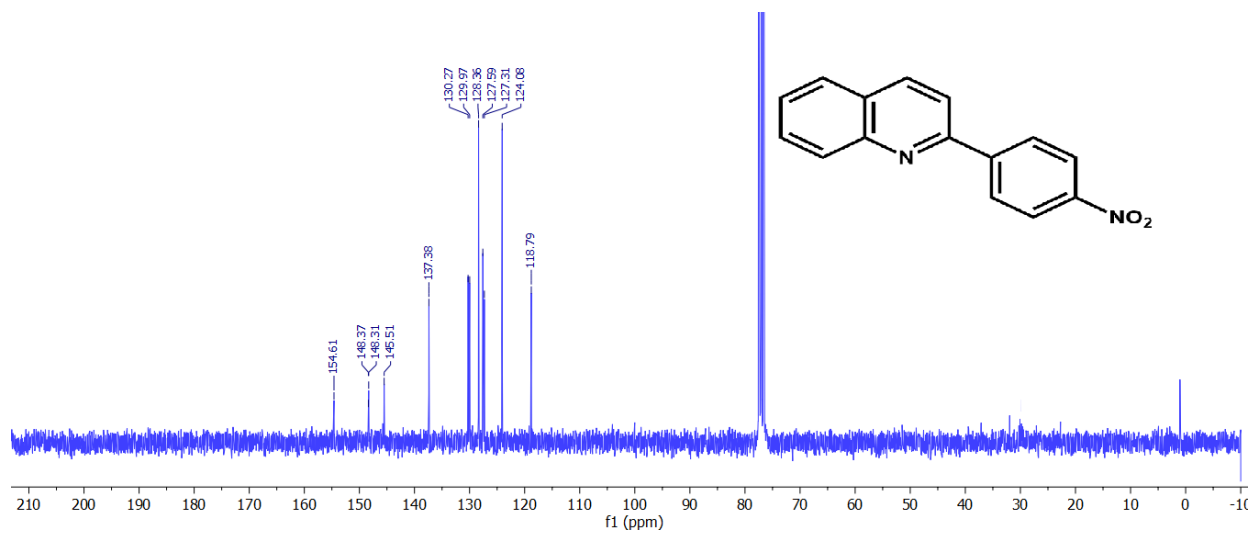

**Fig. S65** <sup>13</sup>C NMR spectrum of compound **9ak** (75 MHz, CDCl<sub>3</sub>).

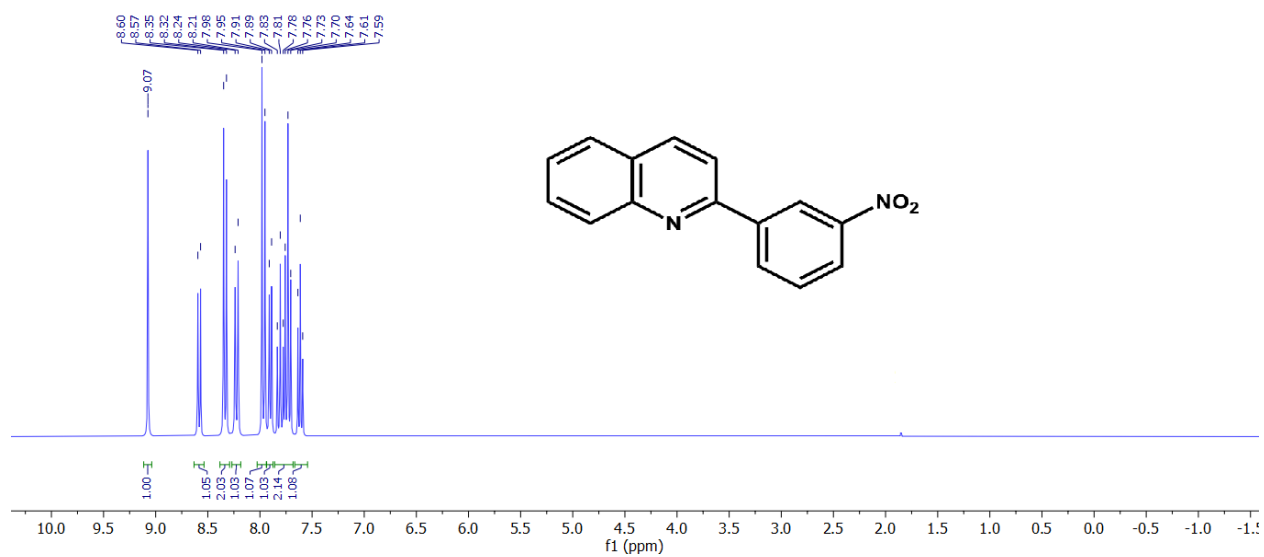

**Fig. S66**  $^1\text{H}$  NMR spectrum of compound **9al** (300 MHz,  $\text{CDCl}_3$ ).

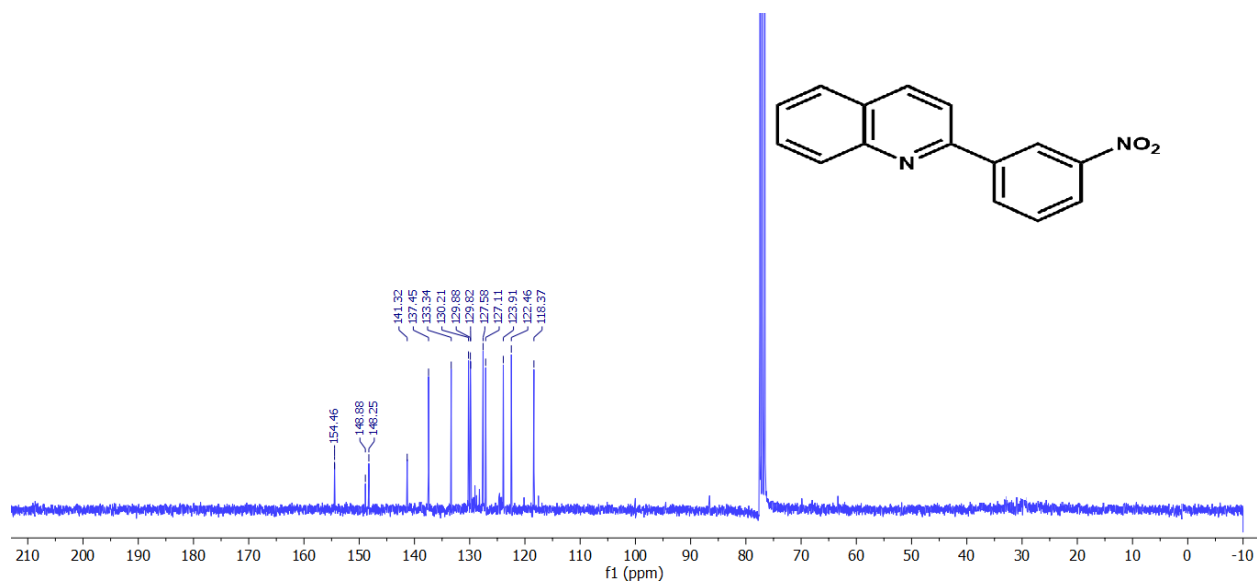

**Fig. S67**  $^{13}\text{C}$  NMR spectrum of compound **9al** (75 MHz,  $\text{CDCl}_3$ ).

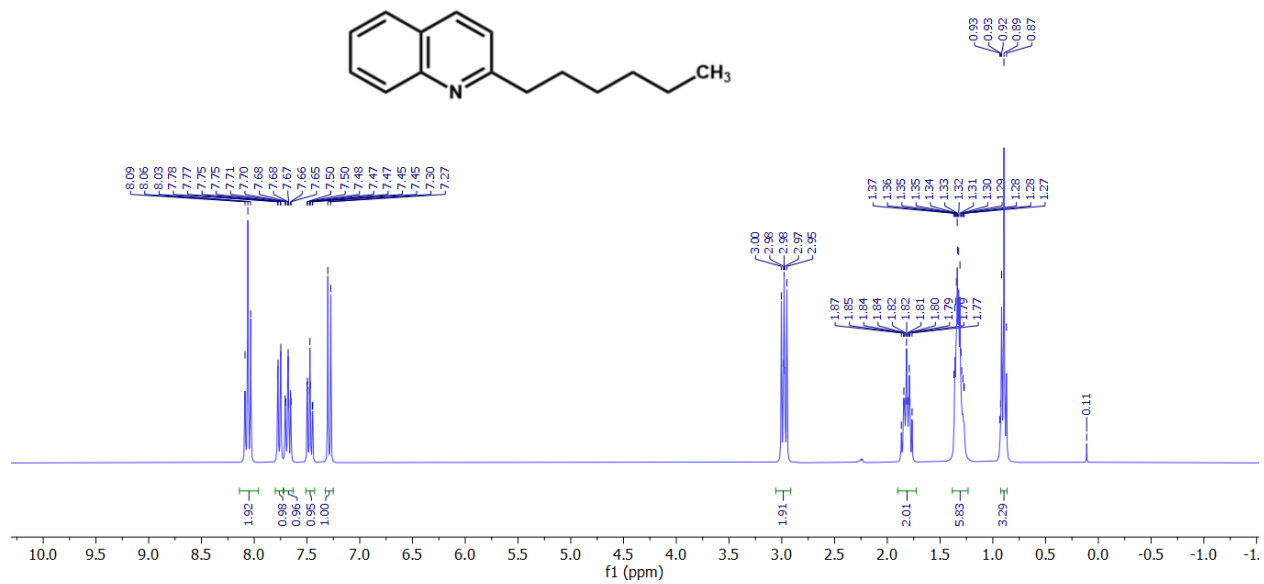

**Fig. S68** <sup>1</sup>H NMR spectrum of compound **9am** (300 MHz, CDCl<sub>3</sub>).

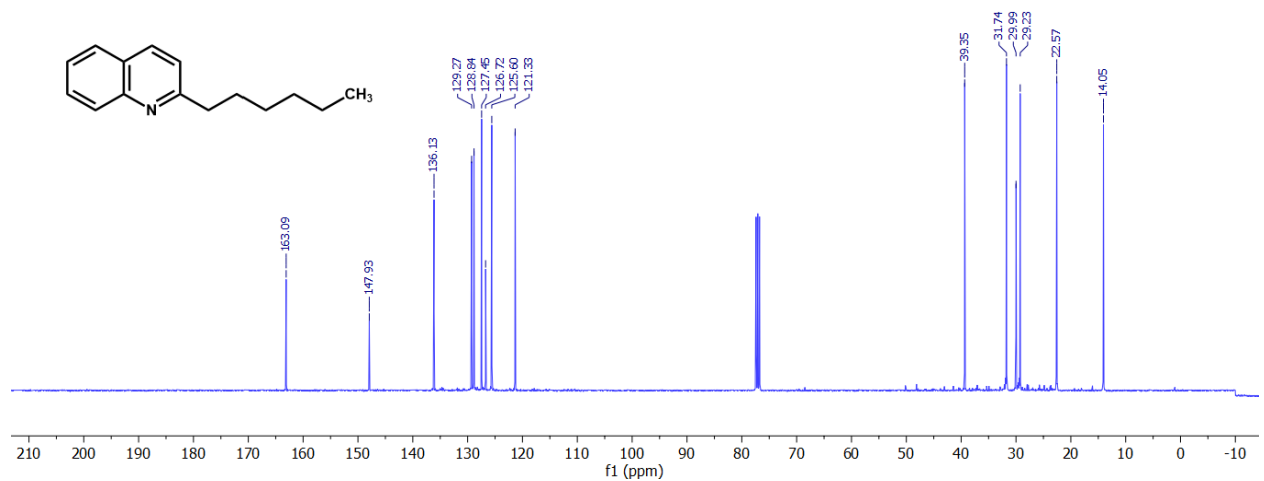

**Fig. S69** <sup>13</sup>C NMR spectrum of compound **9am** (75 MHz, CDCl<sub>3</sub>).

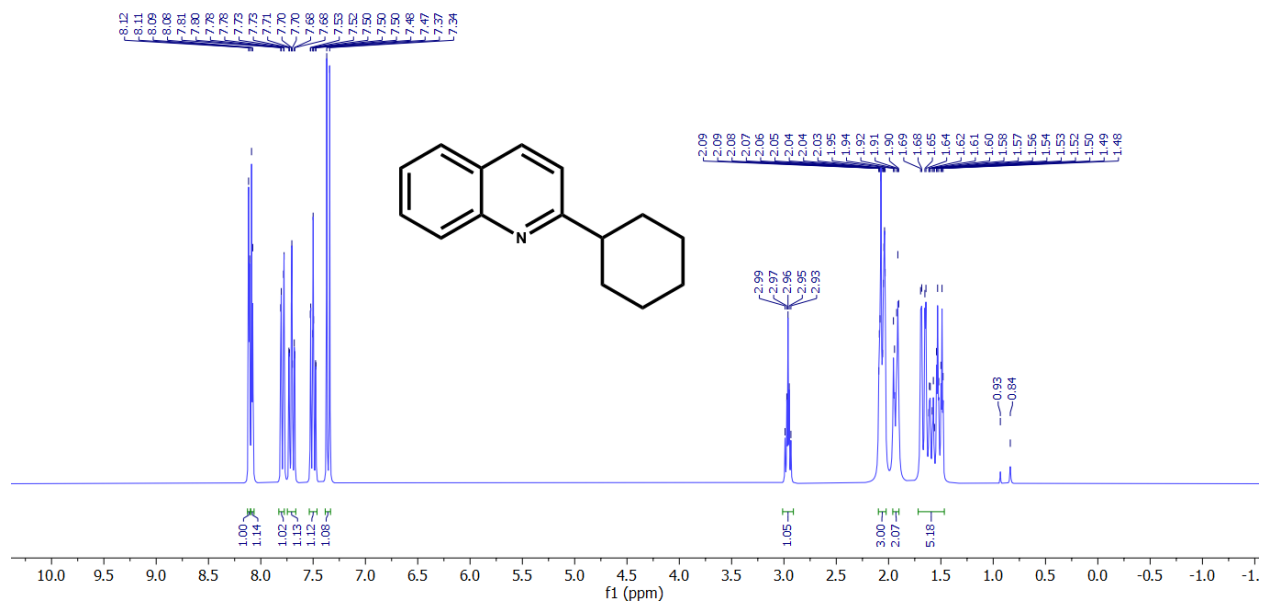

**Fig. S70** <sup>1</sup>H NMR spectrum of compound **9an** (300 MHz, CDCl<sub>3</sub>).

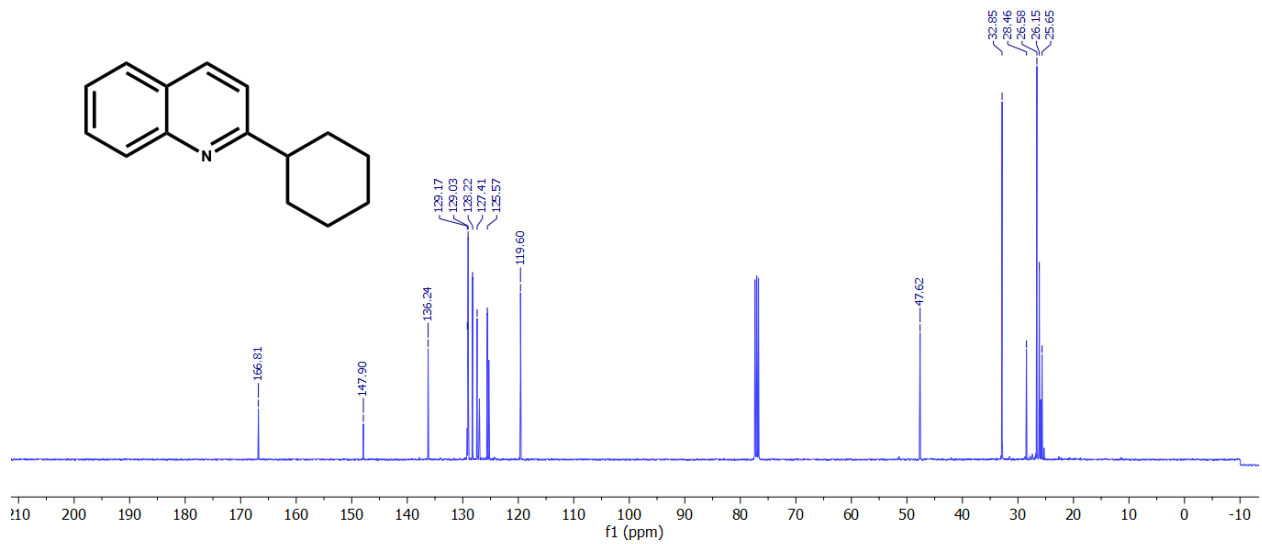

**Fig. S71** <sup>13</sup>C NMR spectrum of compound **9an** (75 MHz, CDCl<sub>3</sub>).

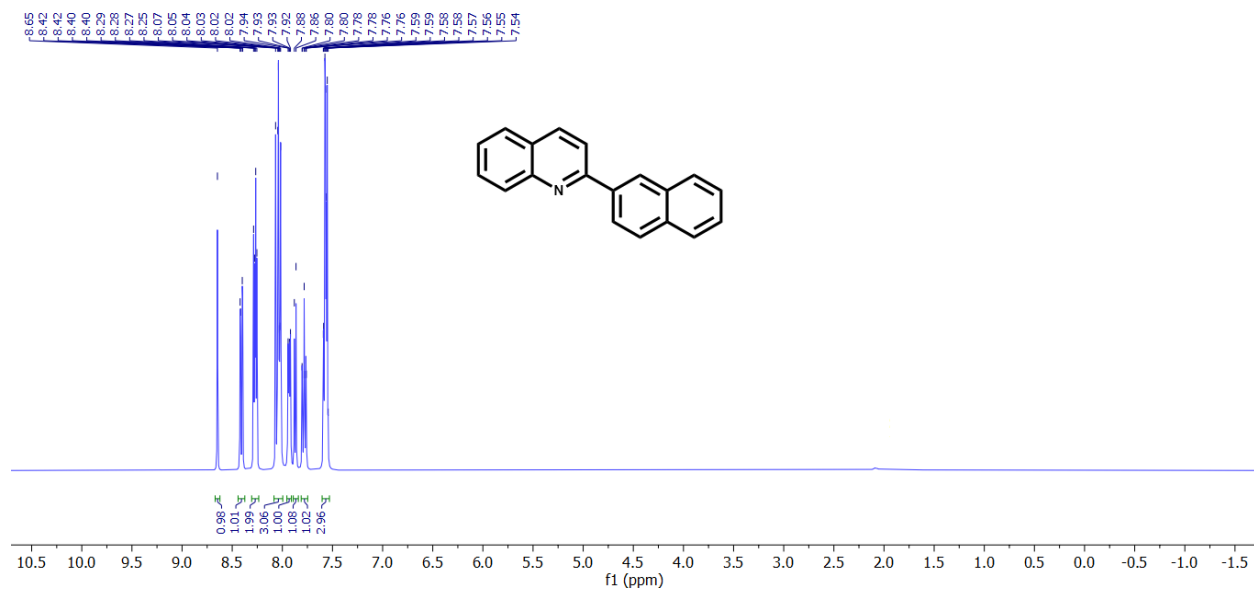

**Fig. S72**  $^1\text{H}$  NMR spectrum of compound **9ao** (300 MHz,  $\text{CDCl}_3$ ).

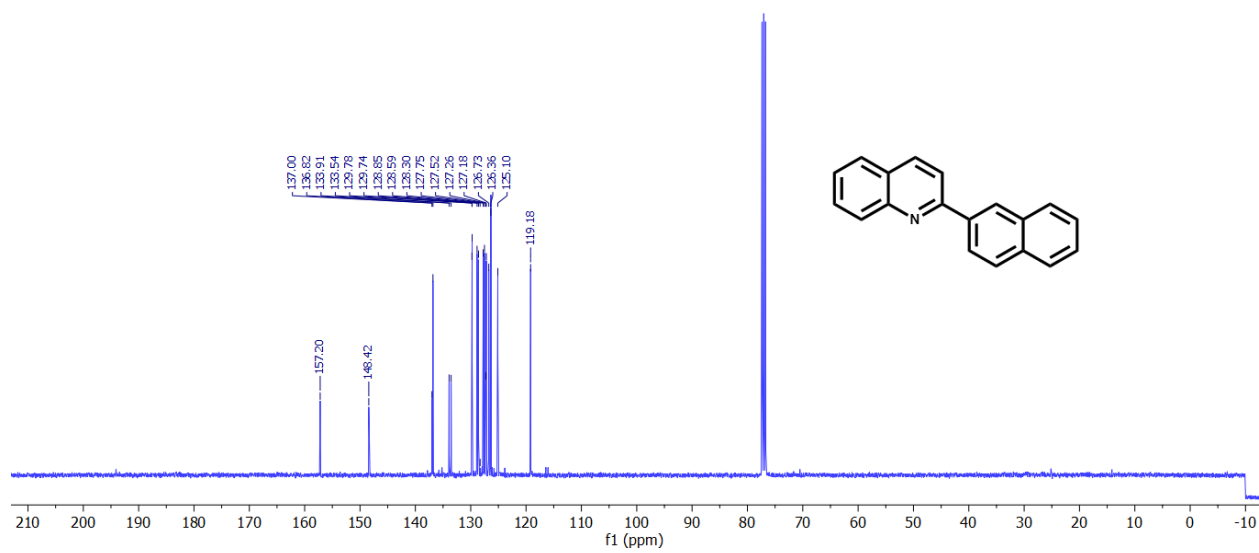

**Fig. S73**  $^{13}\text{C}$  NMR spectrum of compound **9ao** (75 MHz,  $\text{CDCl}_3$ ).

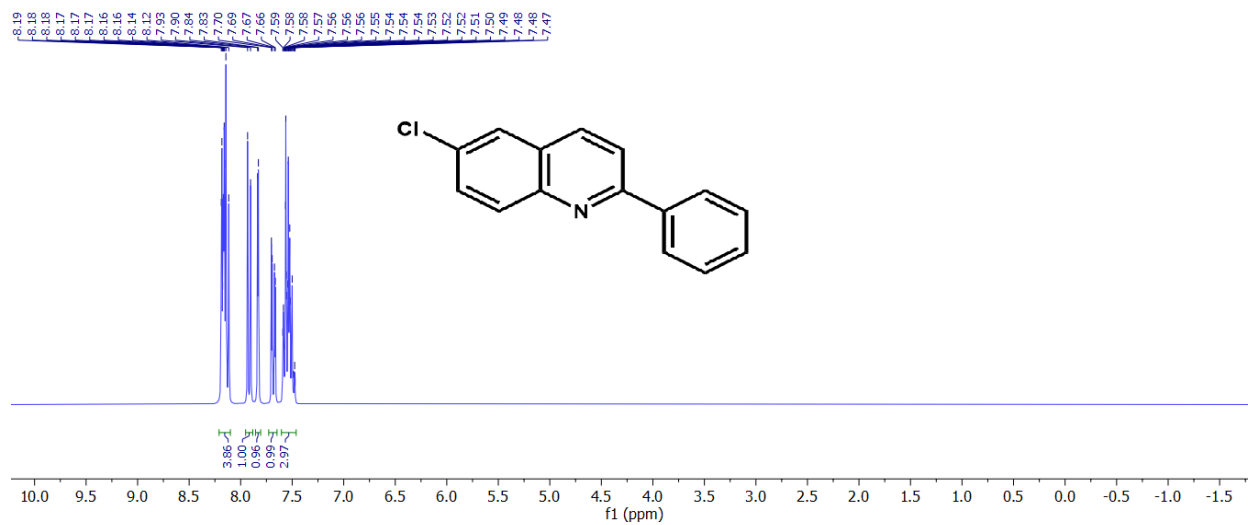

**Fig. S74** <sup>1</sup>H NMR spectrum of compound **10aa** (300 MHz, CDCl<sub>3</sub>).

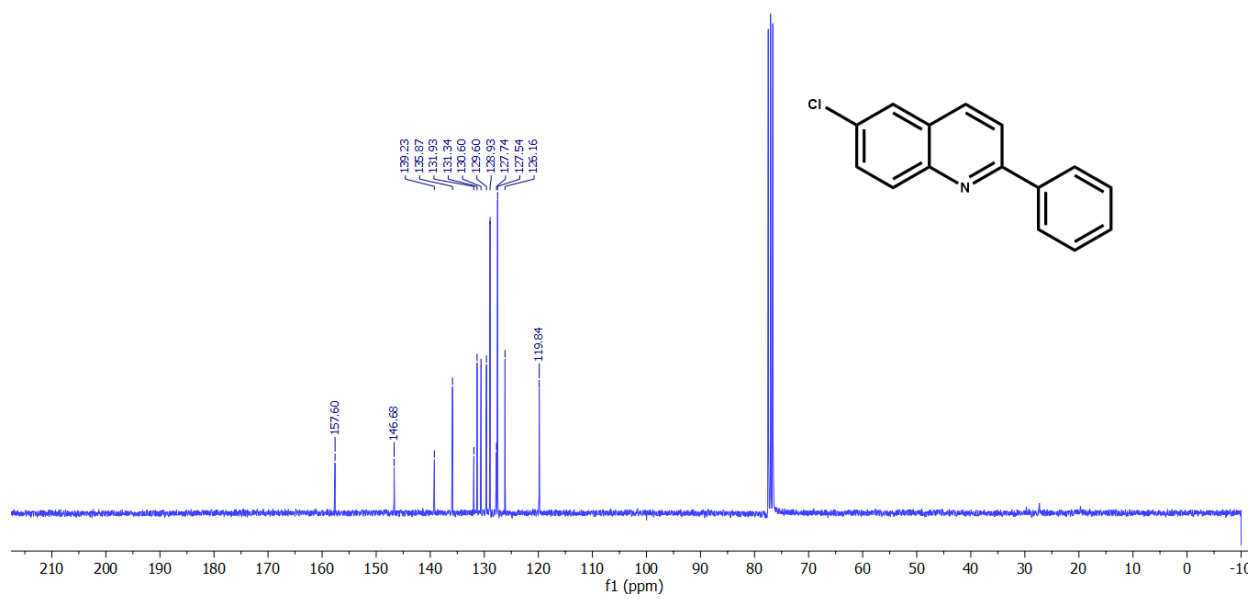

**Fig. S75** <sup>13</sup>C NMR spectrum of compound **10aa** (75 MHz, CDCl<sub>3</sub>).

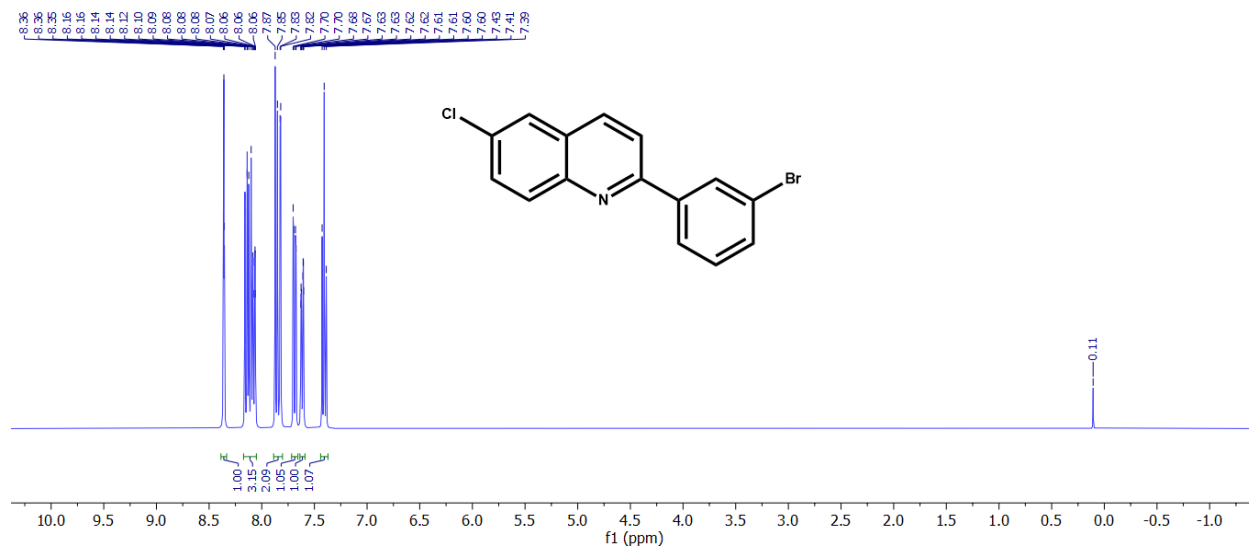

**Fig. S76**  $^1\text{H}$  NMR spectrum of compound **10ab** (300 MHz,  $\text{CDCl}_3$ ).

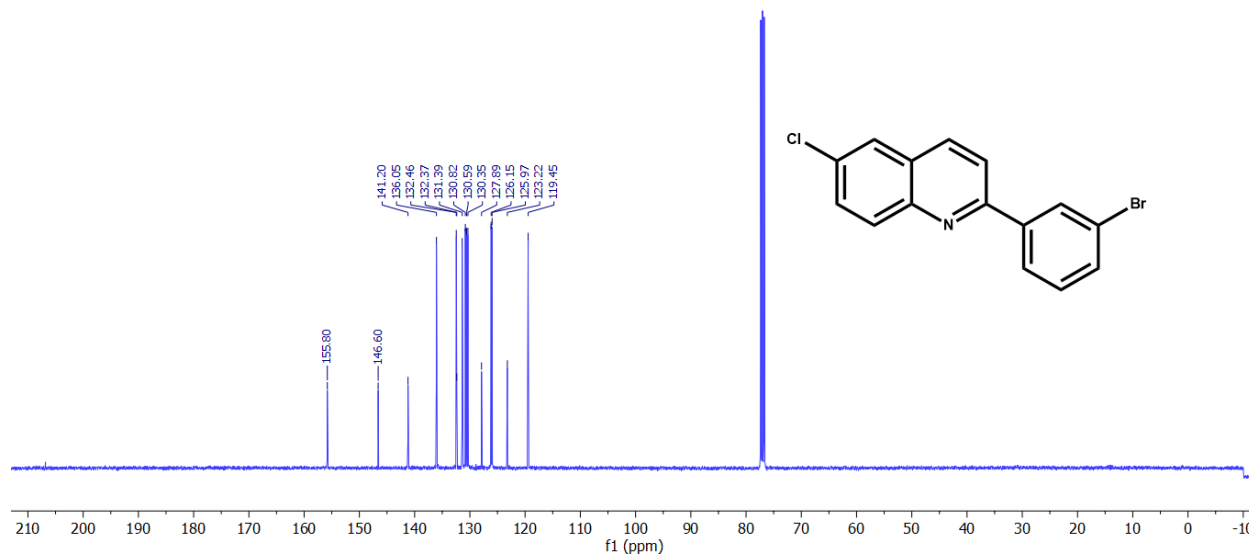

**Fig. S77**  $^{13}\text{C}$  NMR spectrum of compound **10ab** (75 MHz,  $\text{CDCl}_3$ ).

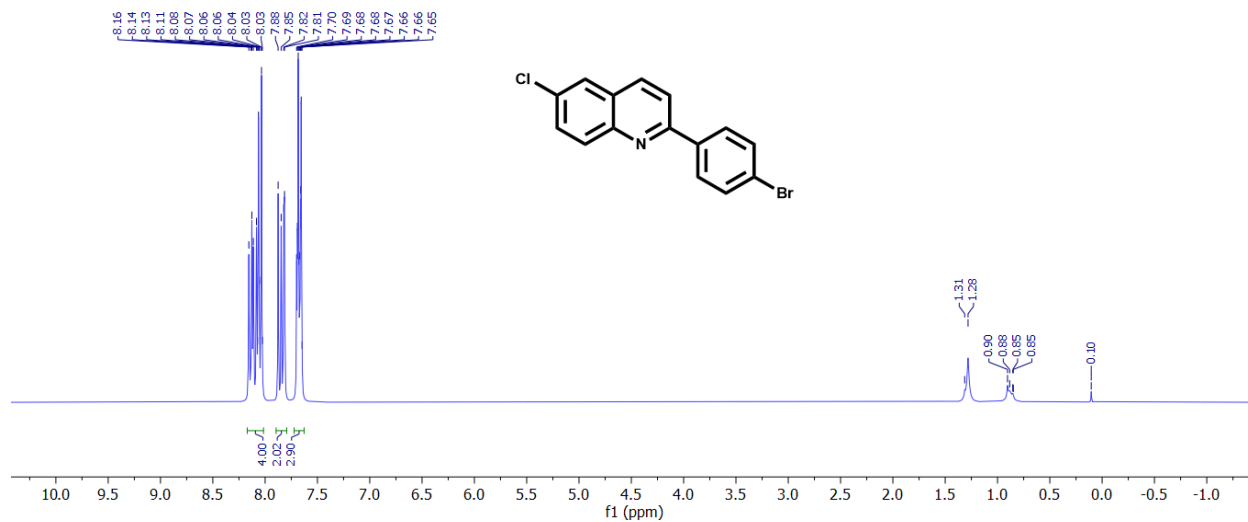

**Fig. S78** <sup>1</sup>H NMR spectrum of compound **10ac** (300 MHz, CDCl<sub>3</sub>).

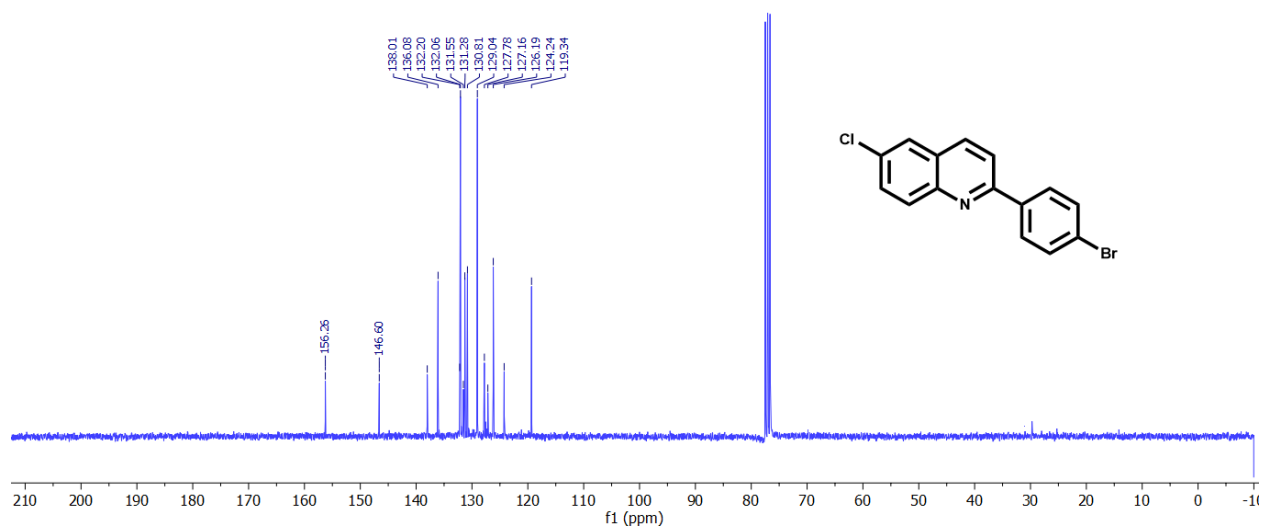

**Fig. S79** <sup>13</sup>C NMR spectrum of compound **10ac** (75 MHz, CDCl<sub>3</sub>).



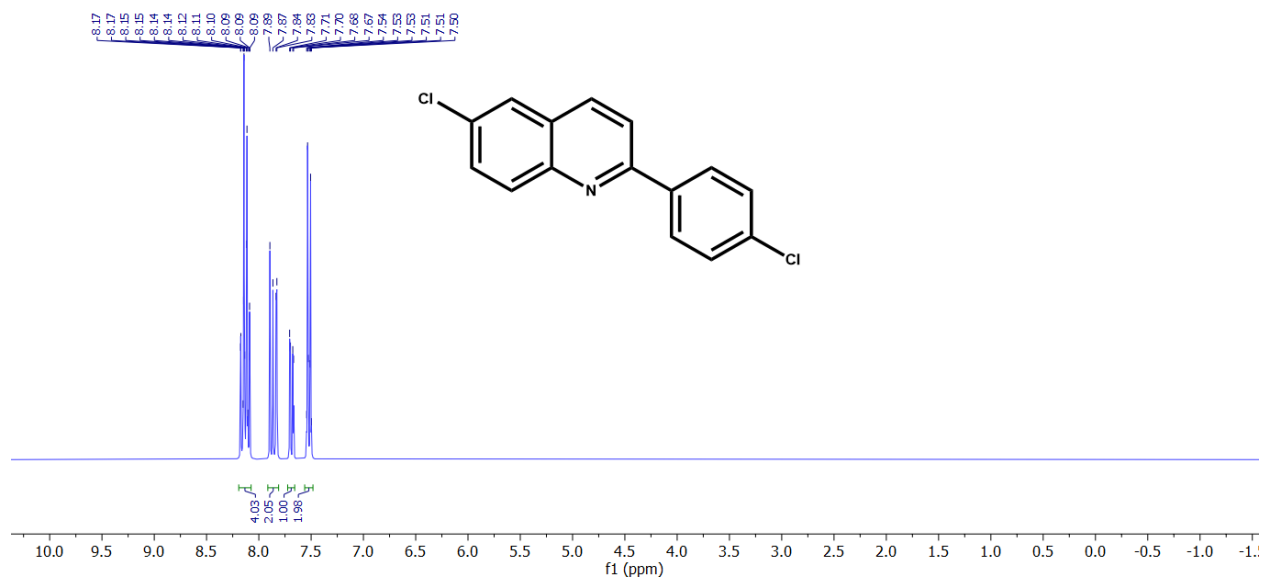

**Fig. S80**  $^1\text{H}$  NMR spectrum of compound **10ad** (300 MHz,  $\text{CDCl}_3$ ).

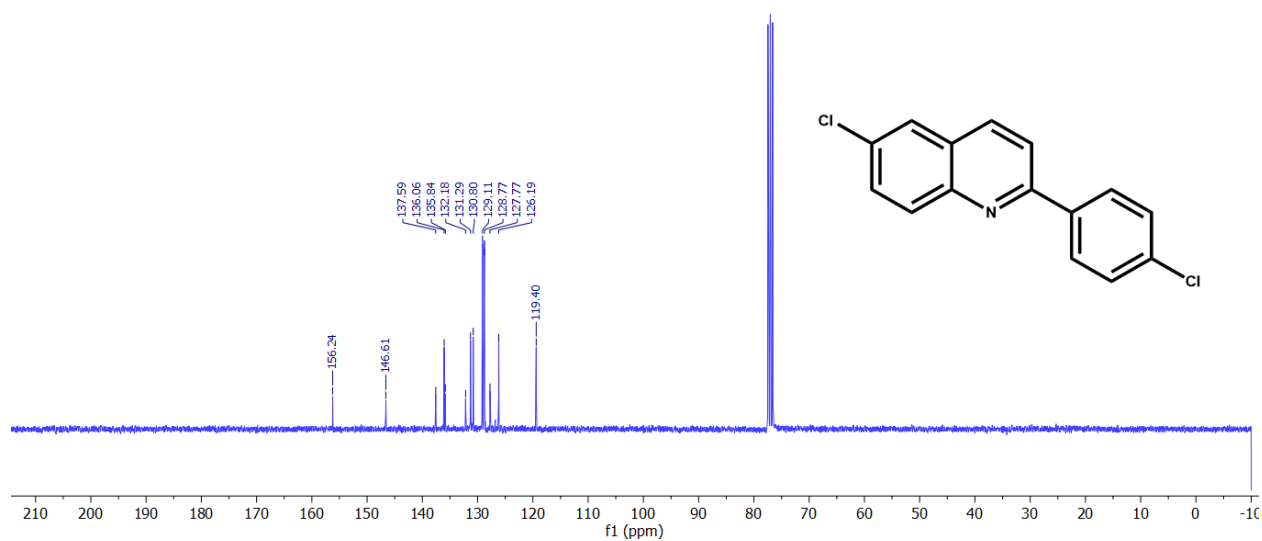

**Fig. S81**  $^{13}\text{C}$  NMR spectrum of compound **10ad** (75 MHz,  $\text{CDCl}_3$ ).

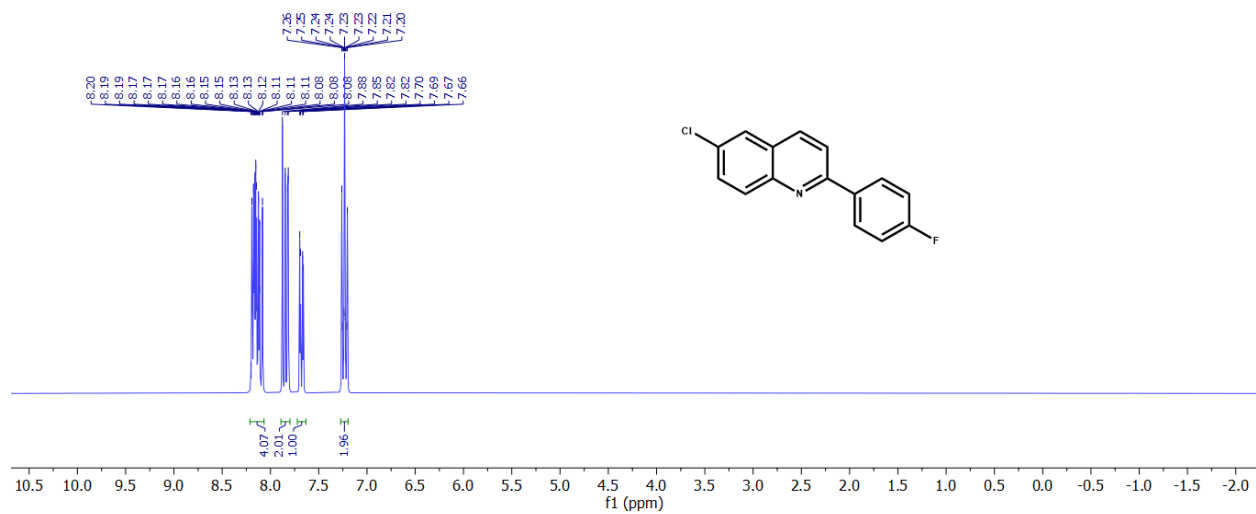

**Fig. S82** <sup>1</sup>H NMR spectrum of compound **10ae** (300 MHz, CDCl<sub>3</sub>).

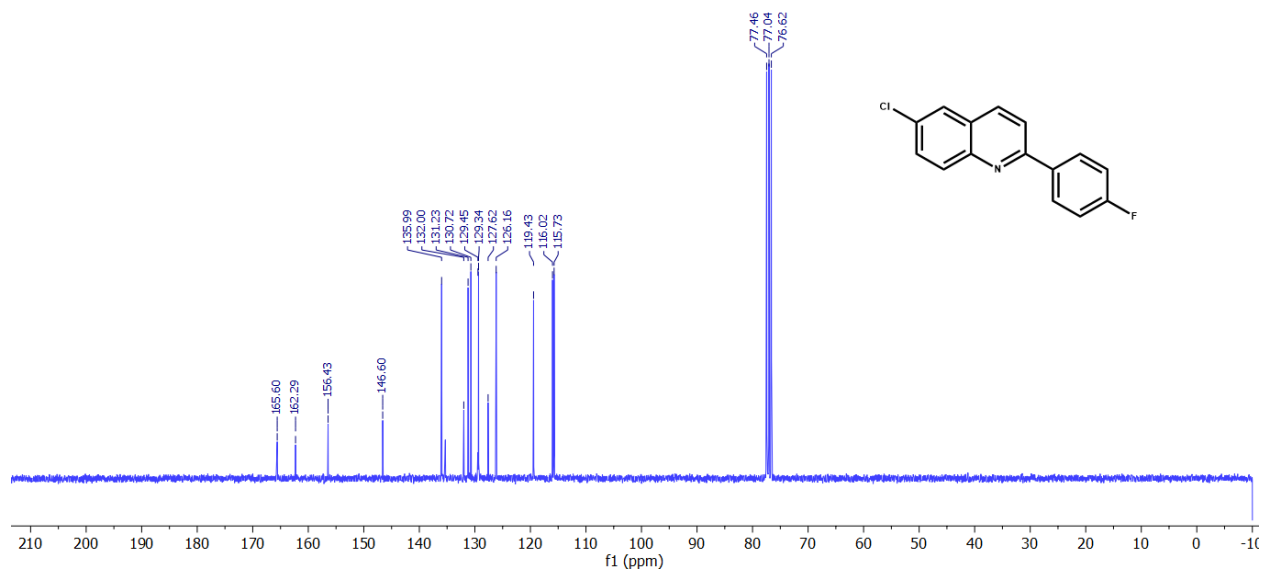

**Fig. S83** <sup>13</sup>C NMR spectrum of compound **10ae** (75 MHz, CDCl<sub>3</sub>).

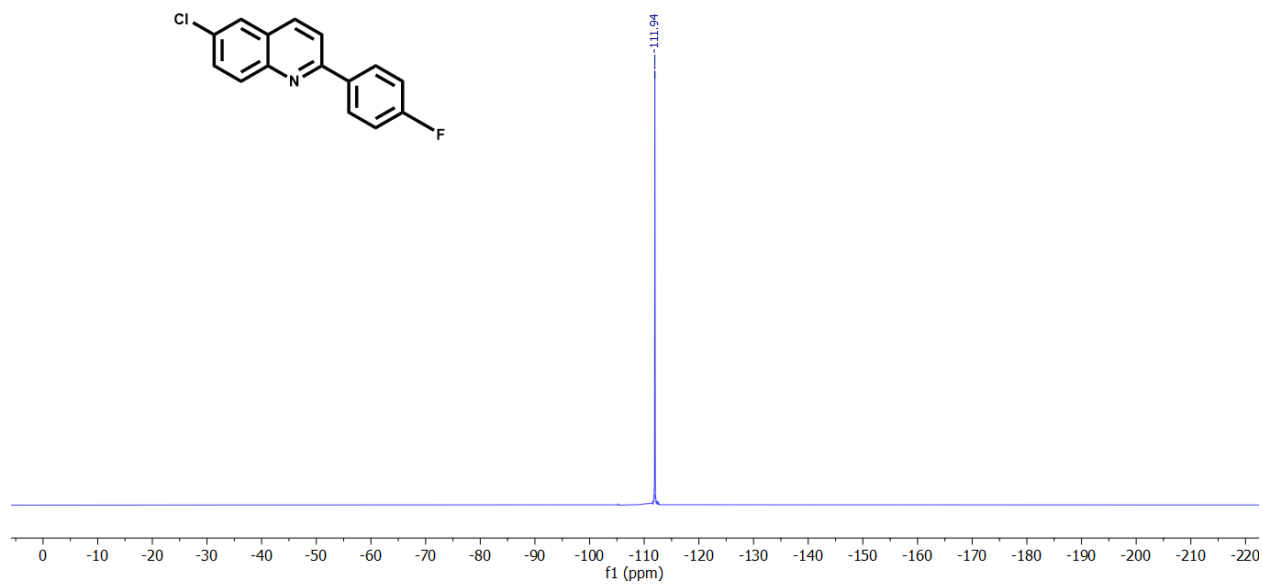

**Fig. S84**  $^{19}\text{F}$  NMR spectrum of compound **10ae** (282 MHz,  $\text{CDCl}_3$ ).

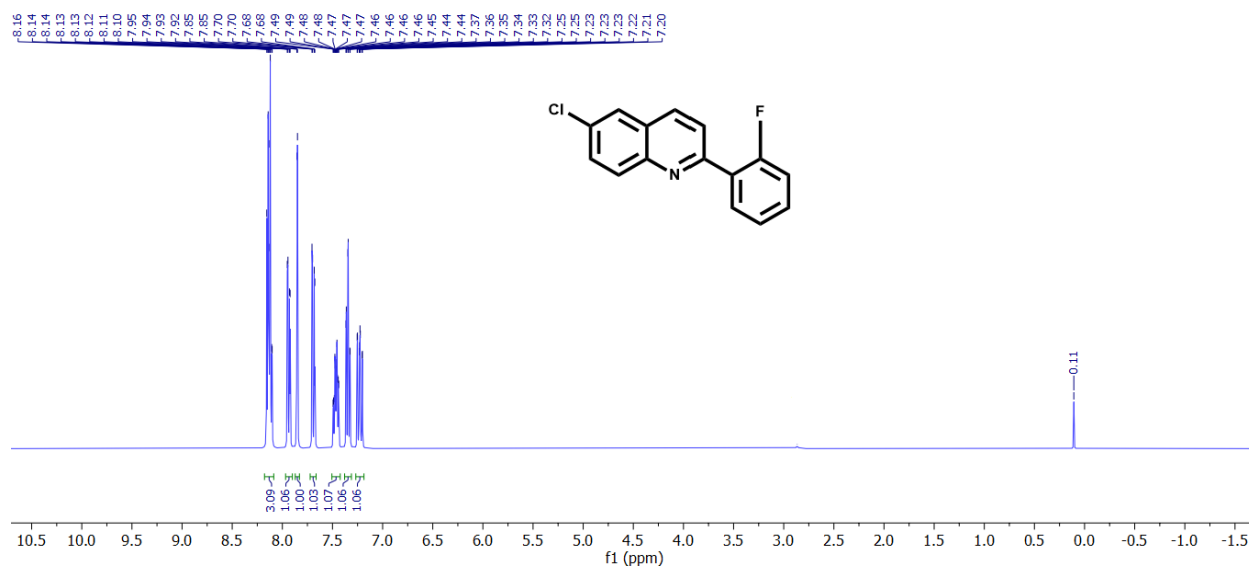

**Fig. S85**  $^1\text{H}$  NMR spectrum of compound **10af** (300 MHz,  $\text{CDCl}_3$ ).

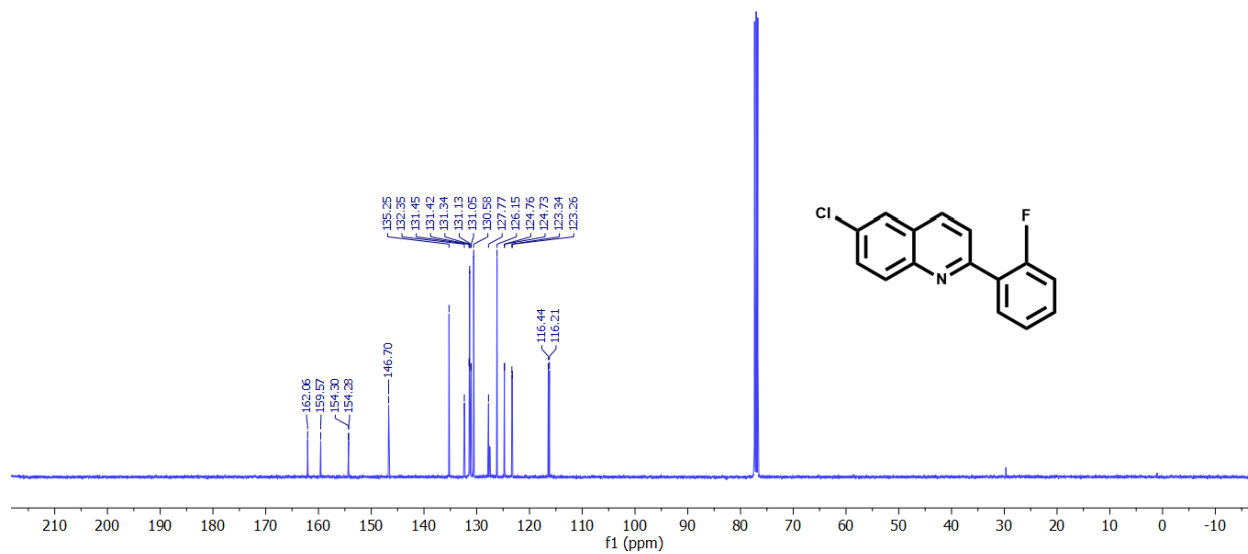

**Fig. S86**  $^{13}\text{C}$  NMR spectrum of compound **10af** (75 MHz,  $\text{CDCl}_3$ ).

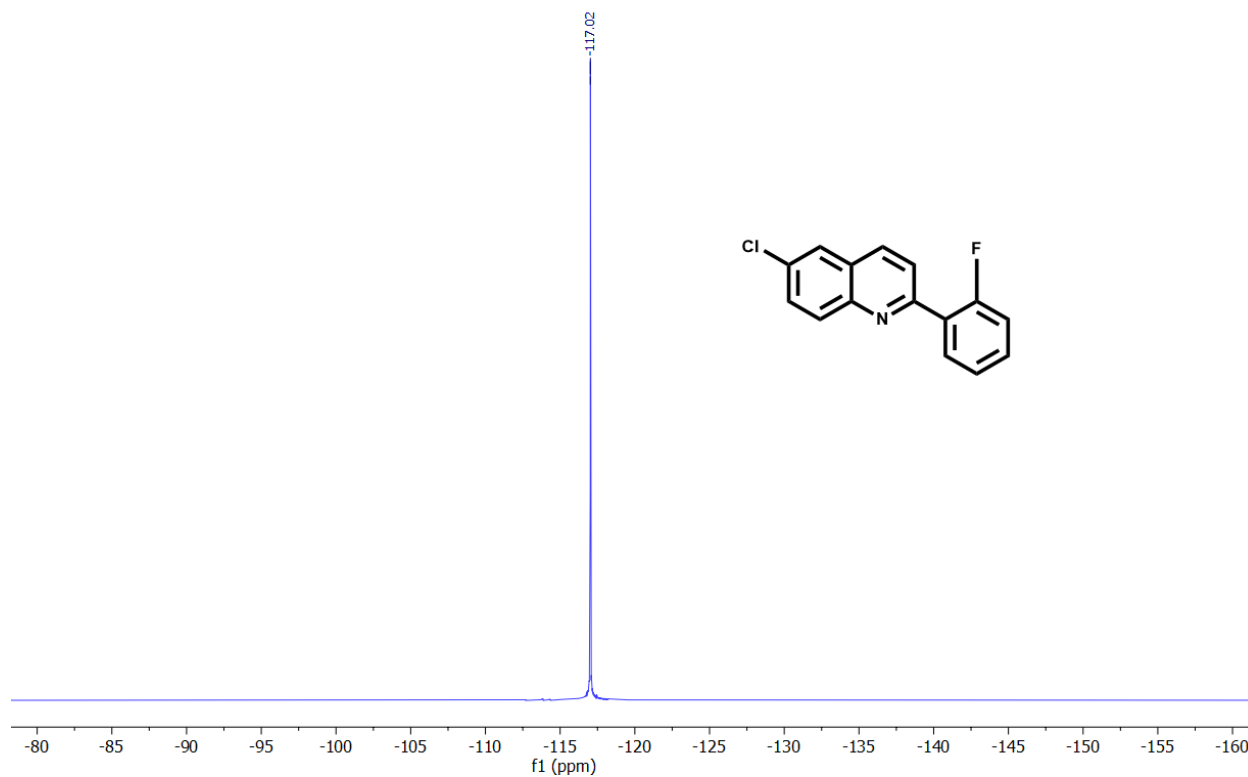

**Fig. S87**  $^{19}\text{F}$  NMR spectrum of compound **10af** (282 MHz,  $\text{CDCl}_3$ ).

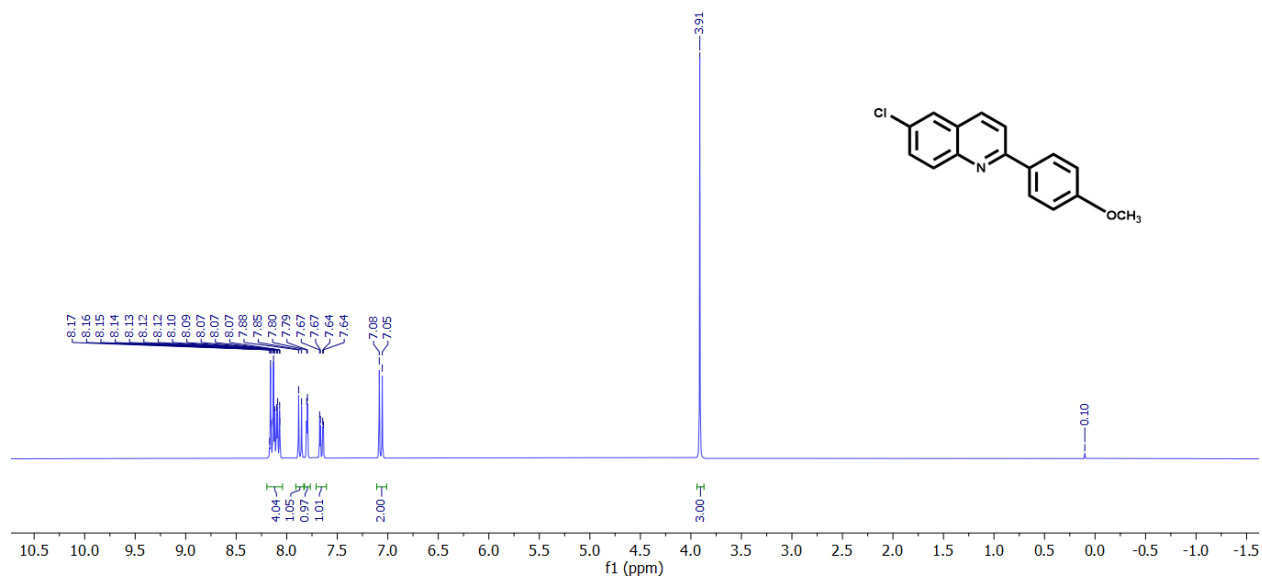

**Fig. S88** <sup>1</sup>H NMR spectrum of compound **10ag** (300 MHz, CDCl<sub>3</sub>).

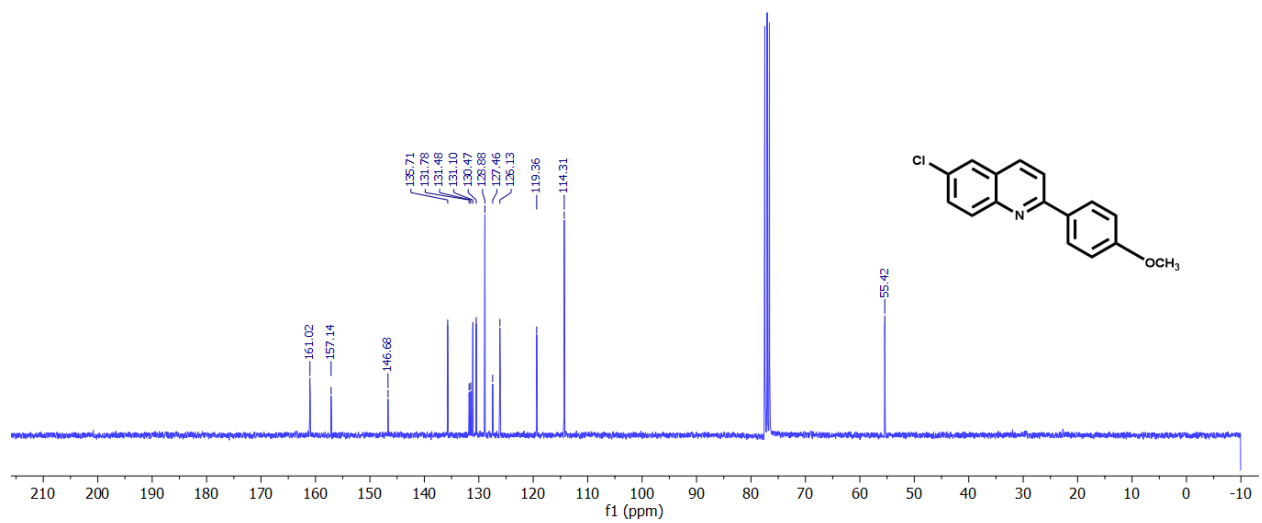

**Fig. S89** <sup>13</sup>C NMR spectrum of compound **10ag** (75 MHz, CDCl<sub>3</sub>).

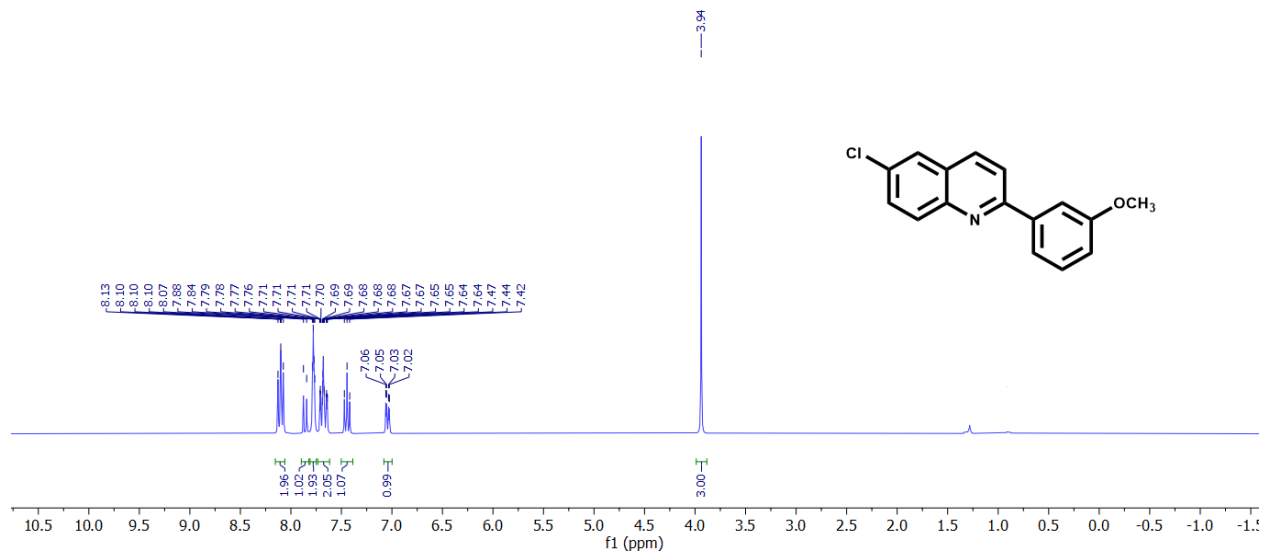

**Fig. S90** <sup>1</sup>H NMR spectrum of compound **10ah** (300 MHz, CDCl<sub>3</sub>).

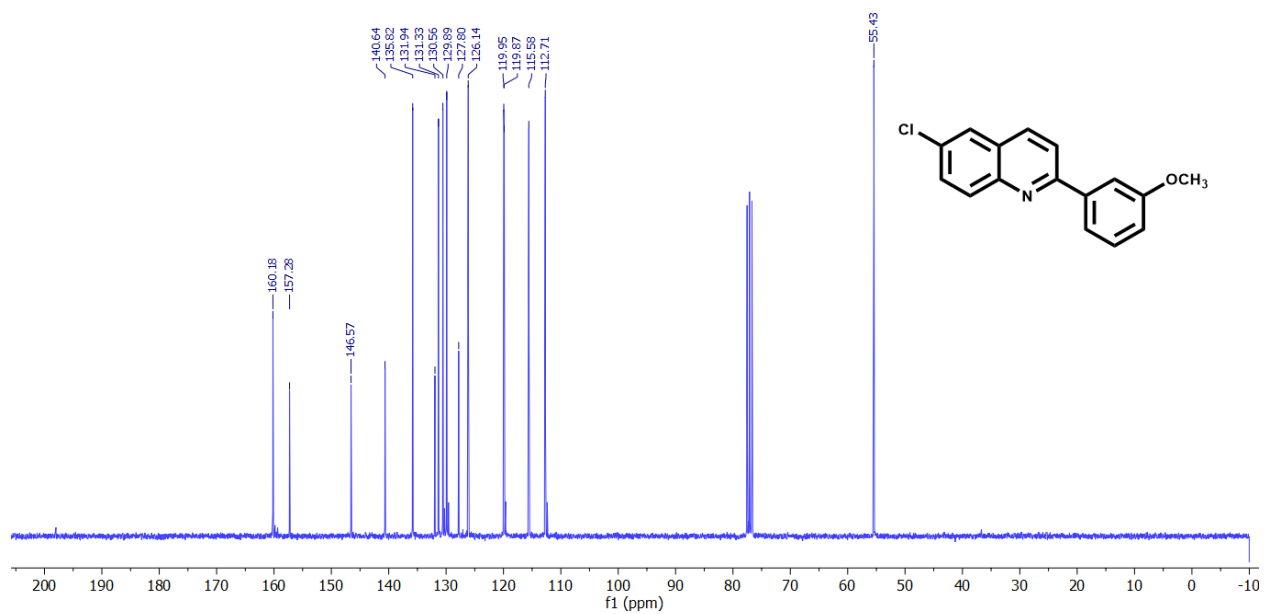

**Fig. S91** <sup>13</sup>C NMR spectrum of compound **10ah** (75 MHz, CDCl<sub>3</sub>).

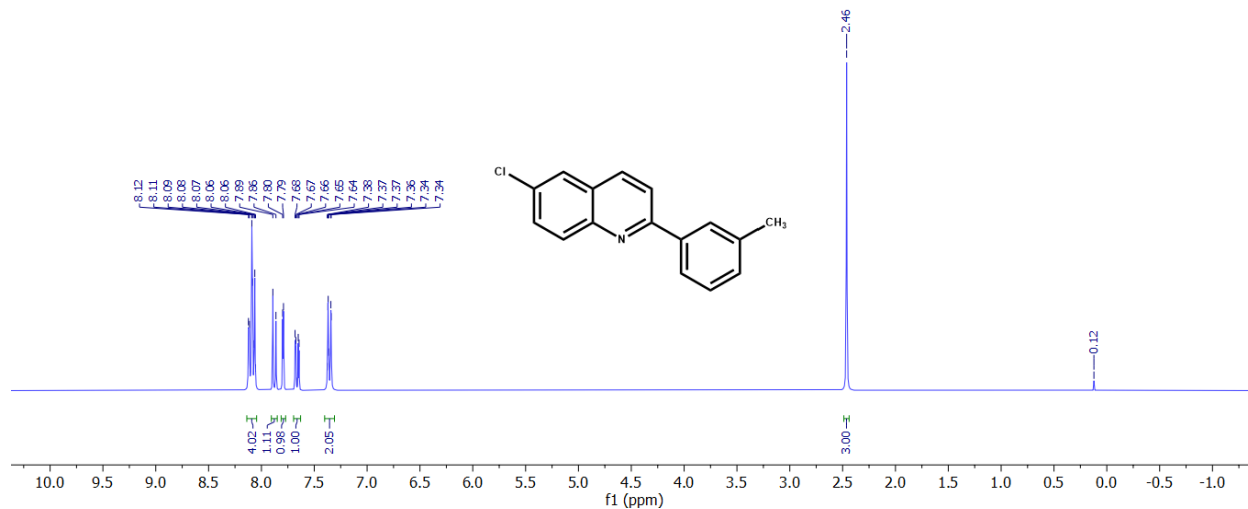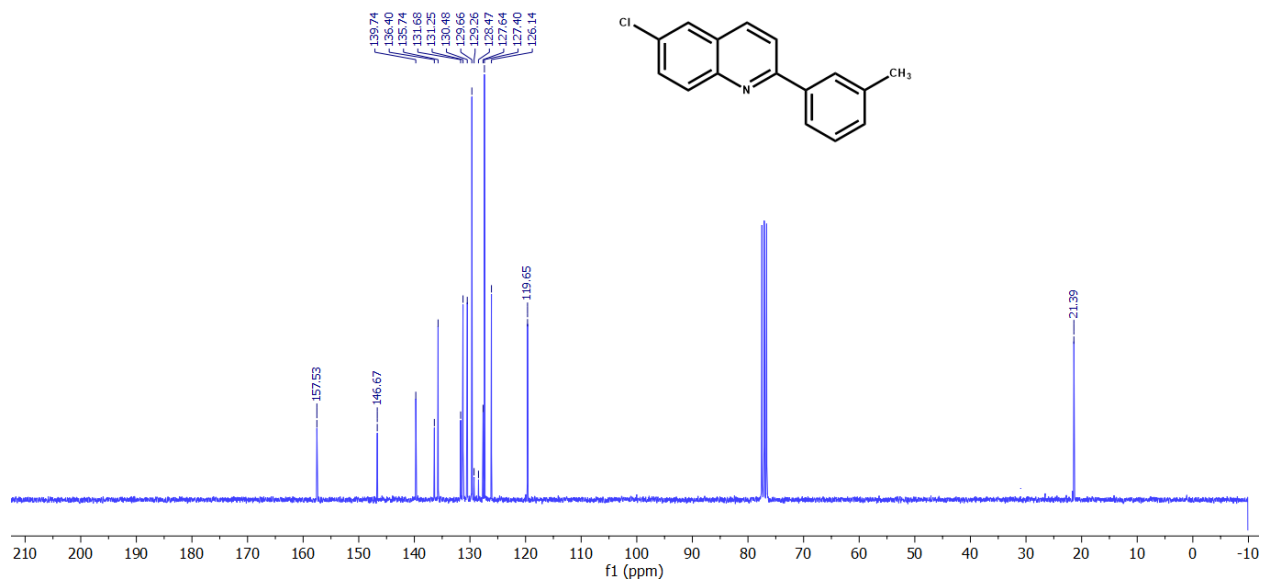

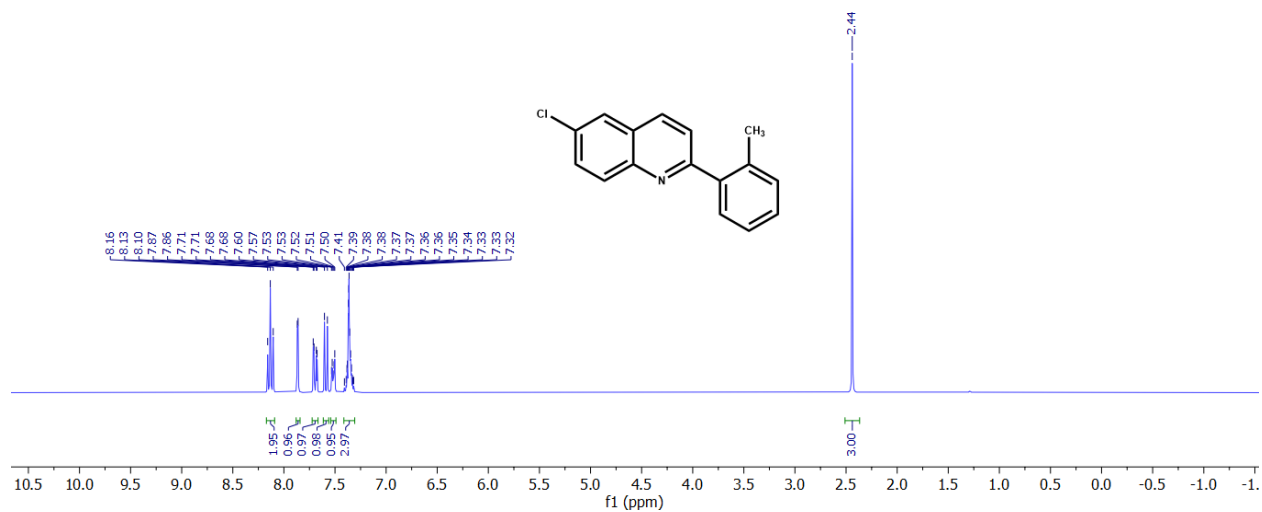

**Fig. S94** <sup>1</sup>H NMR spectrum of compound **10aj** (300 MHz, CDCl<sub>3</sub>).

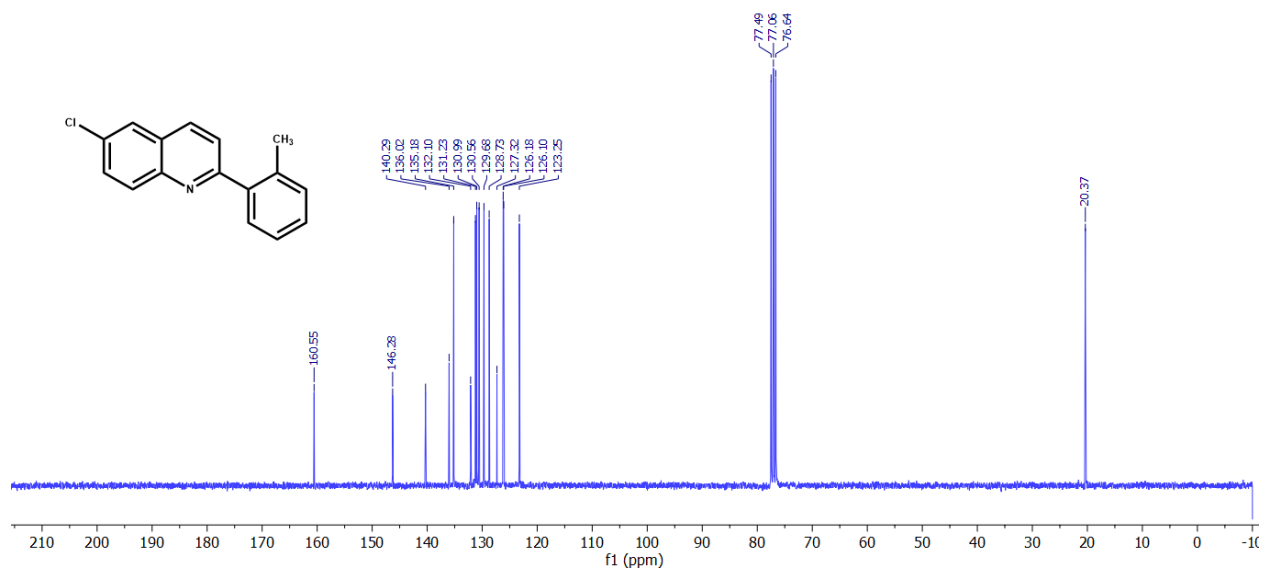

**Fig. S95** <sup>13</sup>C NMR spectrum of compound **10aj** (75 MHz, CDCl<sub>3</sub>).



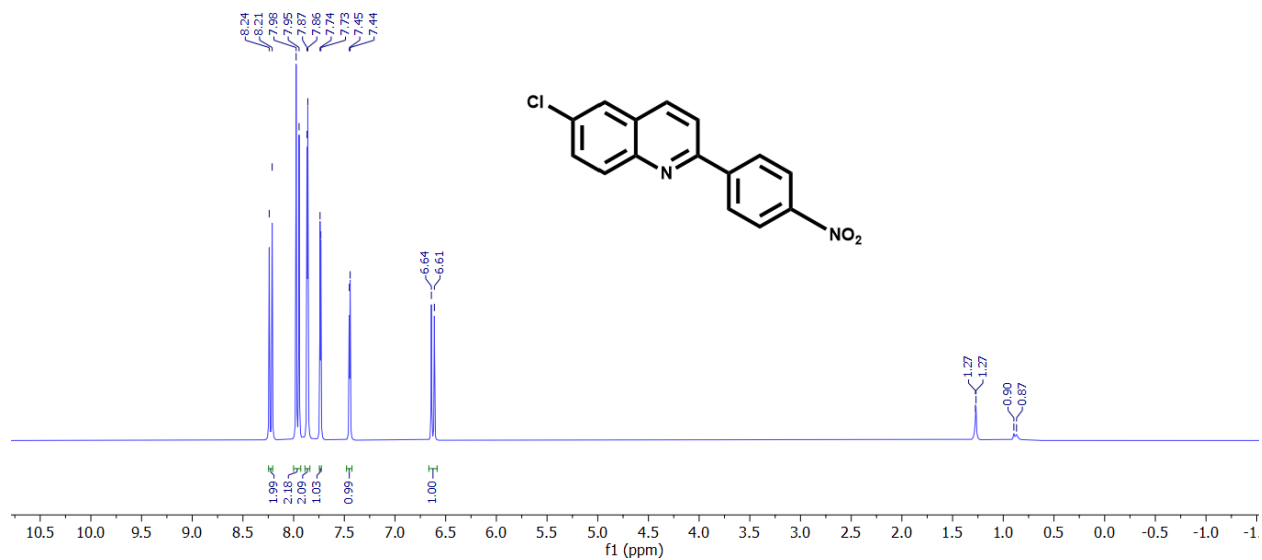

**Fig. S96** <sup>1</sup>H NMR spectrum of compound **10ak** (300 MHz, CDCl<sub>3</sub>).

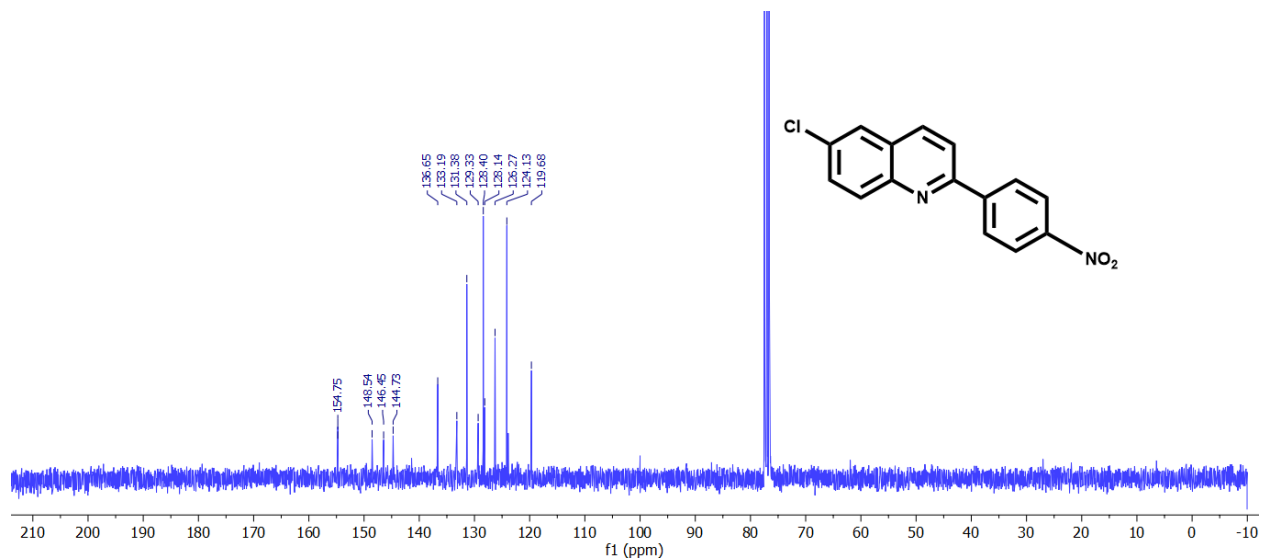

**Fig. S97** <sup>13</sup>C NMR spectrum of compound **10ak** (75 MHz, CDCl<sub>3</sub>).

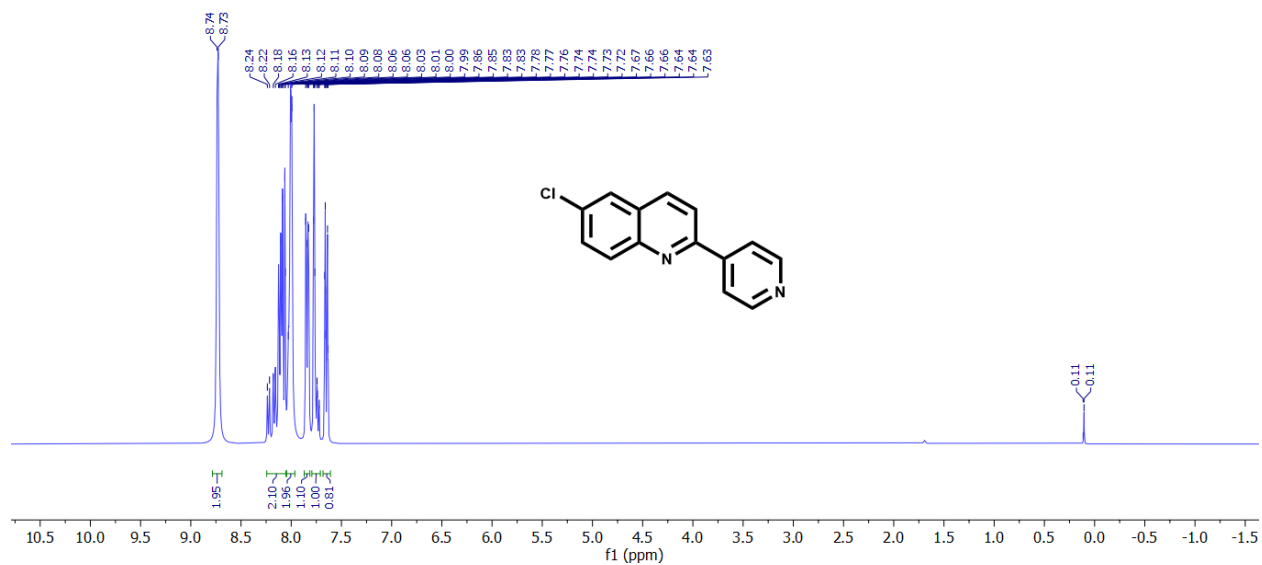

**Fig. S98** <sup>1</sup>H NMR spectrum of compound **10al** (300 MHz, CDCl<sub>3</sub>).

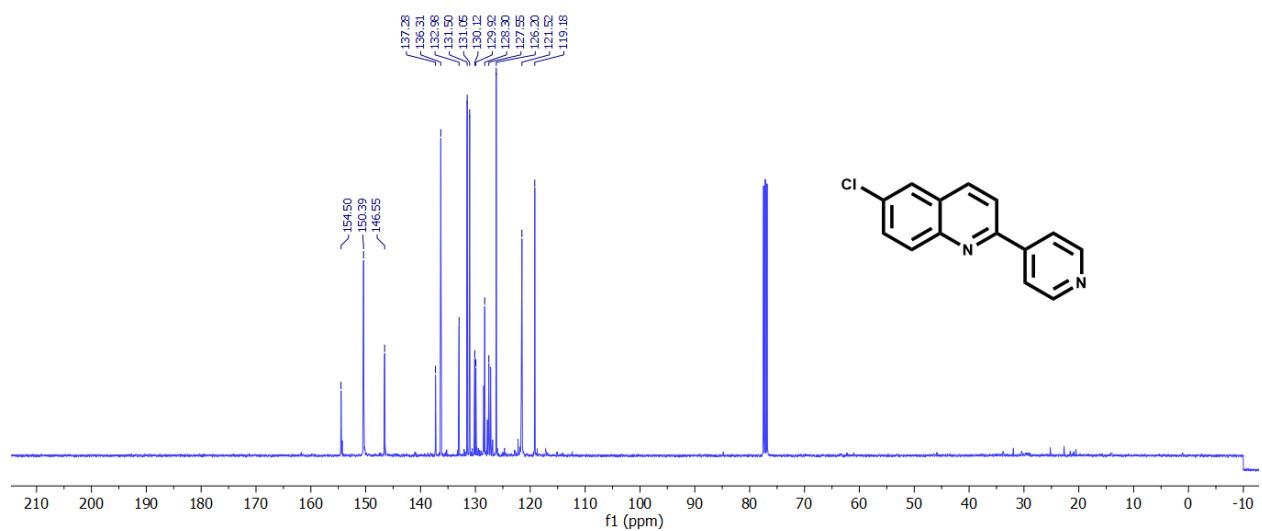

**Fig. S99** <sup>13</sup>C NMR spectrum of compound **10al** (75 MHz, CDCl<sub>3</sub>).

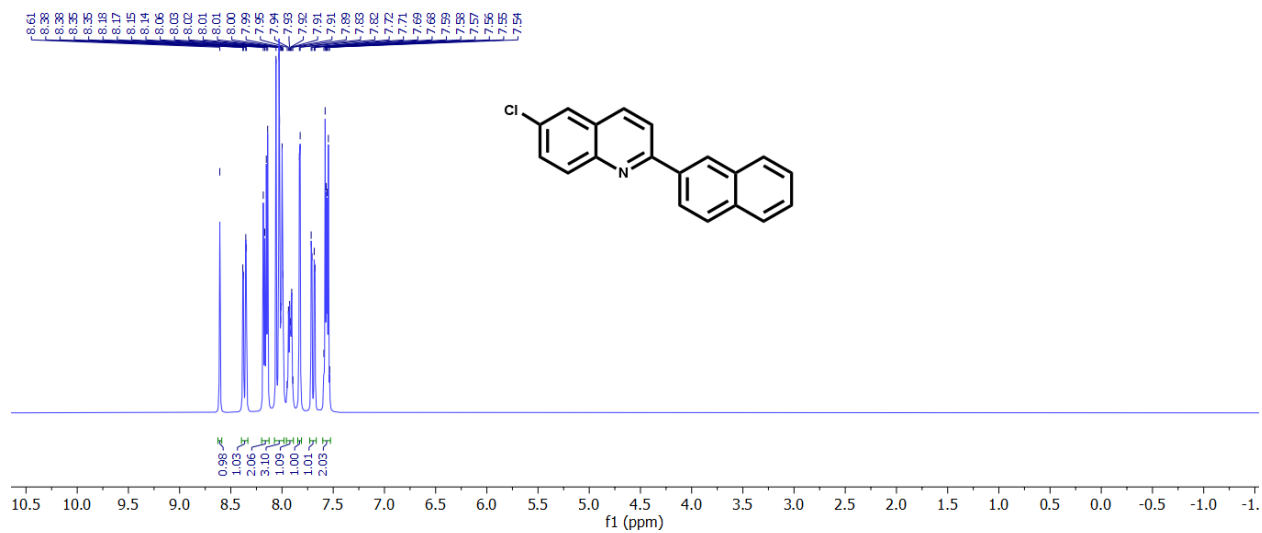

**Fig. S100**  $^1\text{H NMR}$  spectrum of compound **10am** (300 MHz,  $\text{CDCl}_3$ ).

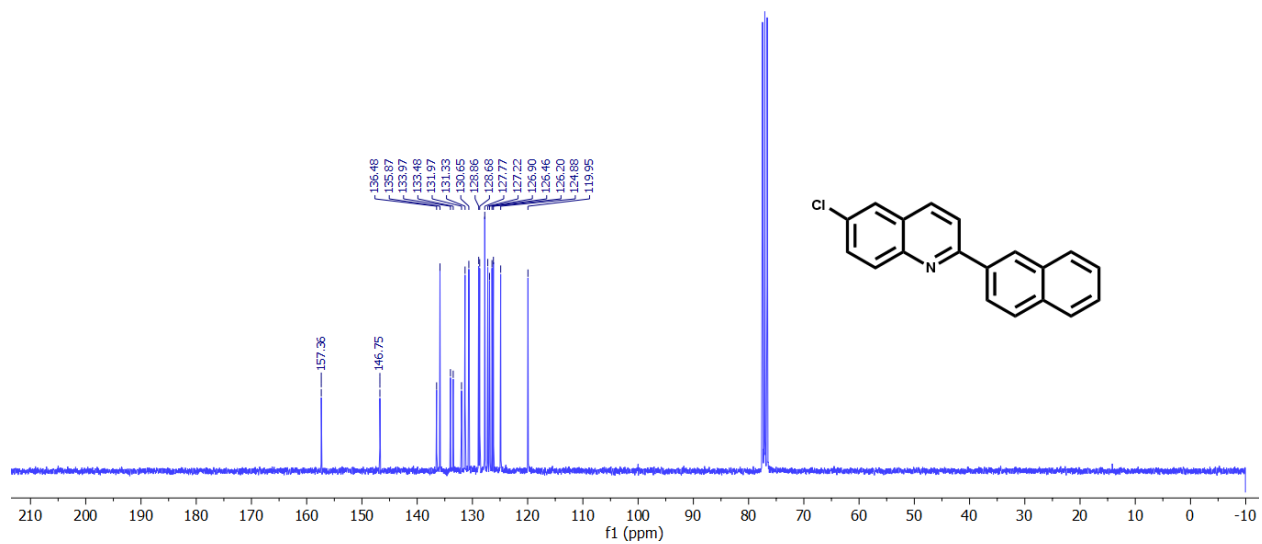

**Fig. S101**  $^{13}\text{C NMR}$  spectrum of compound **10am** (75 MHz,  $\text{CDCl}_3$ ).

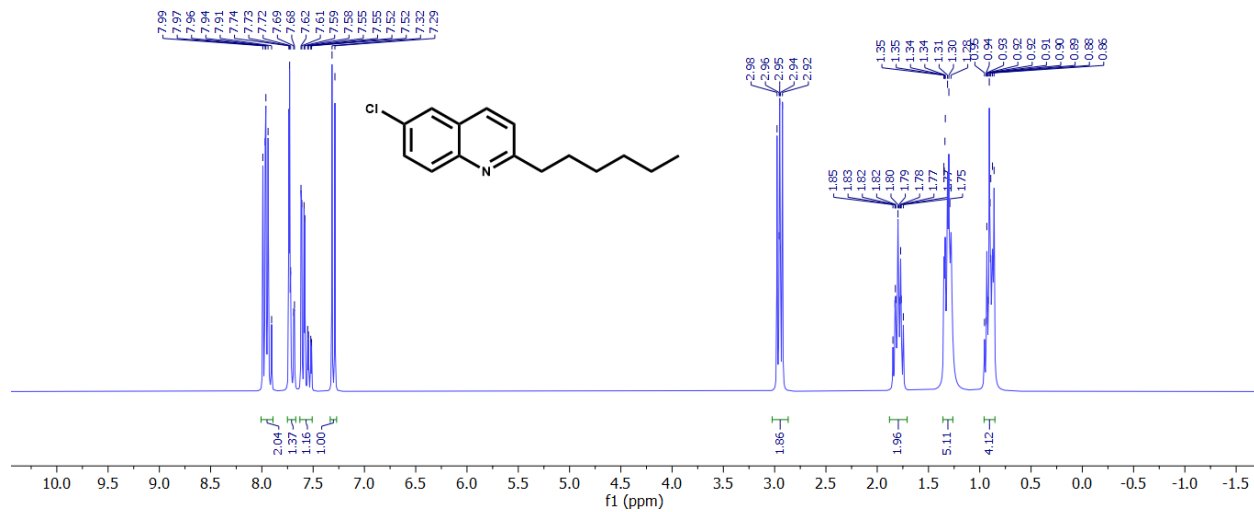

**Fig. S102** <sup>1</sup>H NMR spectrum of compound **10an** (300 MHz, CDCl<sub>3</sub>).

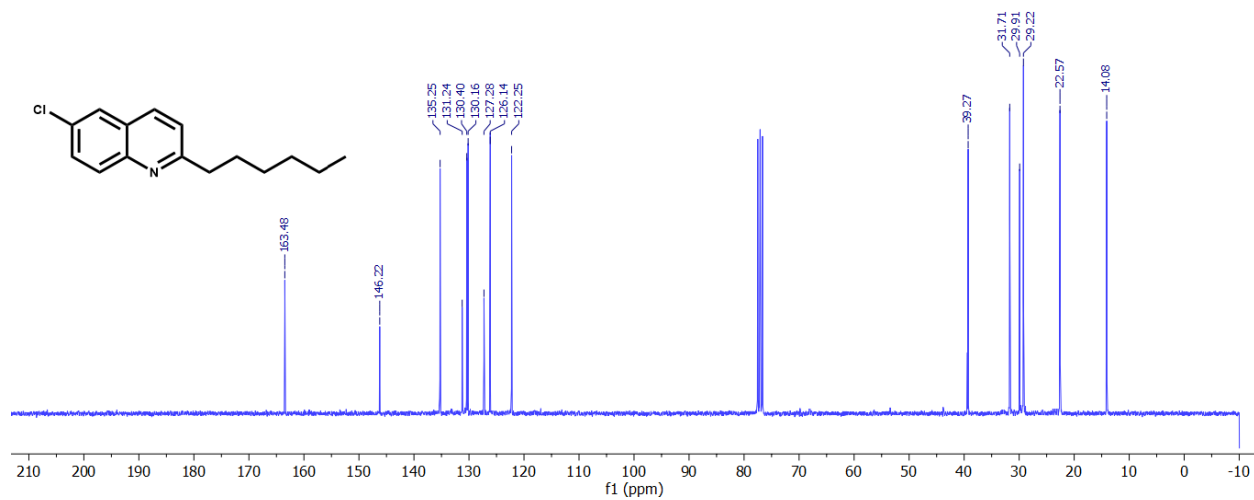

**Fig. S103** <sup>13</sup>C NMR spectrum of compound **10an** (75 MHz, CDCl<sub>3</sub>).

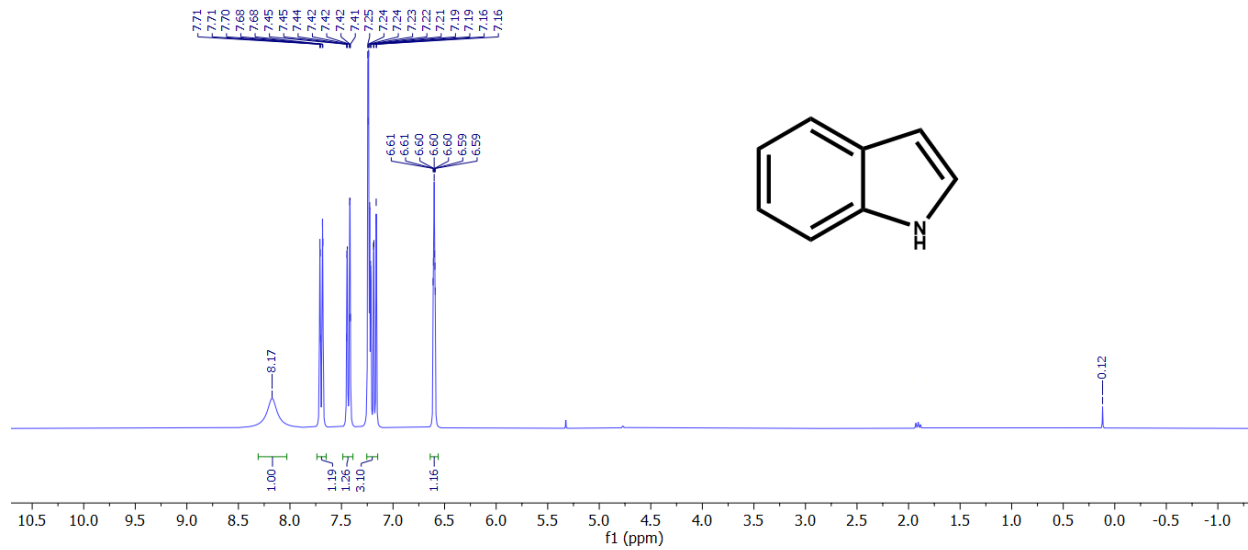

**Fig. S104** <sup>1</sup>H NMR spectrum of compound **11a** (300 MHz, CDCl<sub>3</sub>).

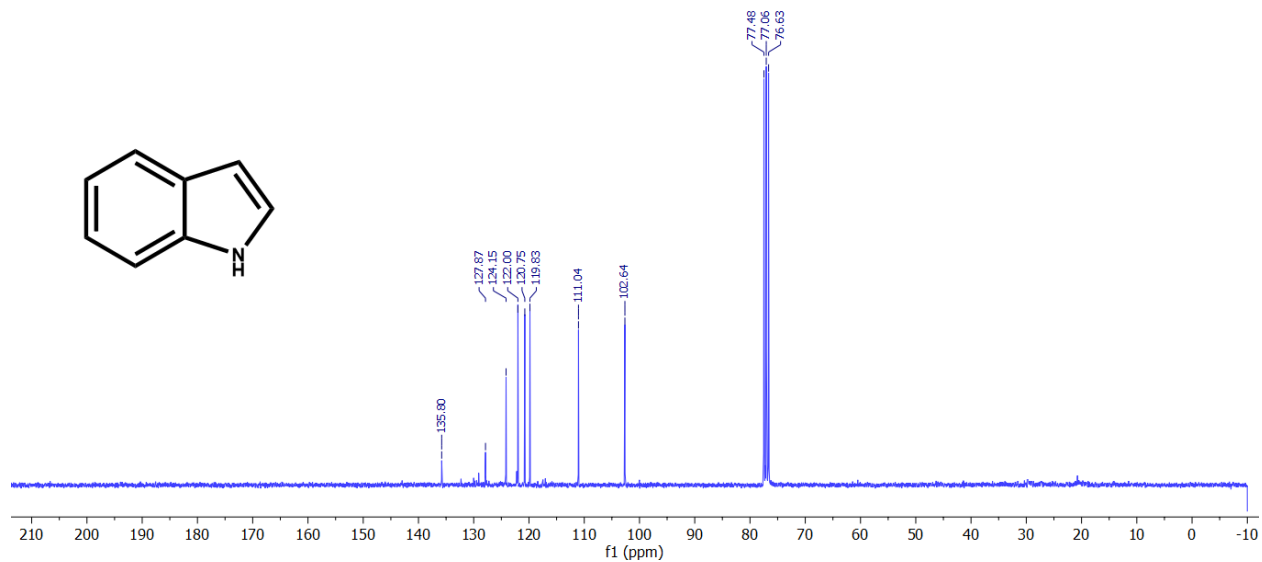

**Fig. S105** <sup>13</sup>C NMR spectrum of compound **11a** (75 MHz, CDCl<sub>3</sub>).

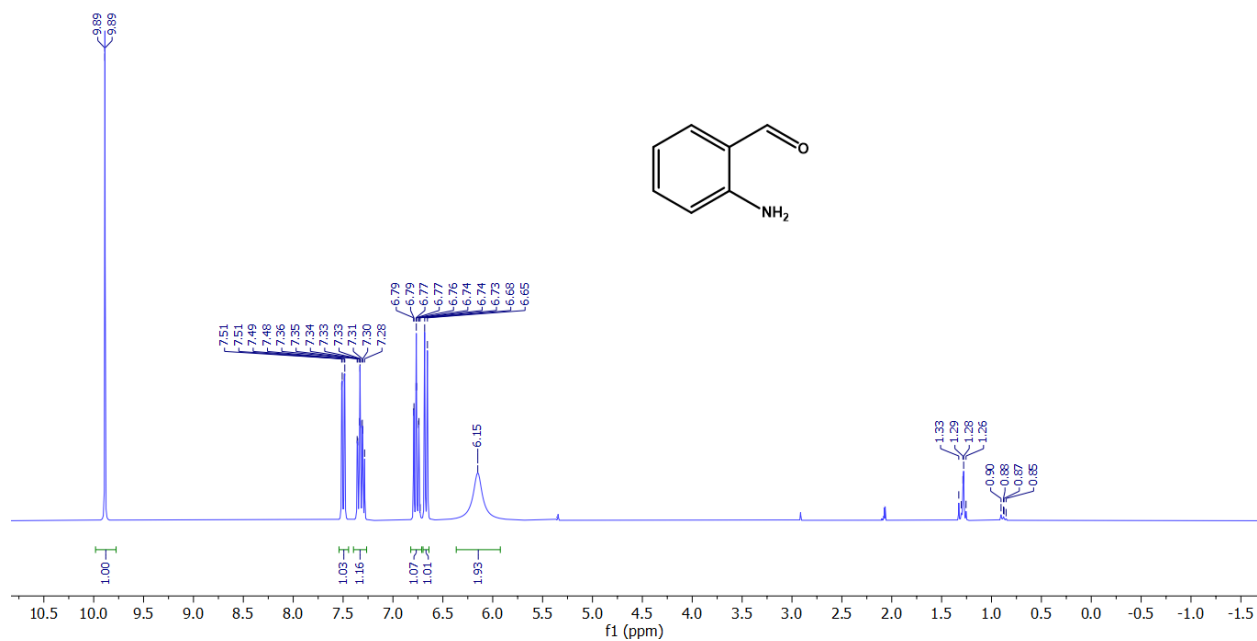

**Fig. S106**  $^1\text{H NMR}$  spectrum of compound **6a'** (300 MHz,  $\text{CDCl}_3$ ).

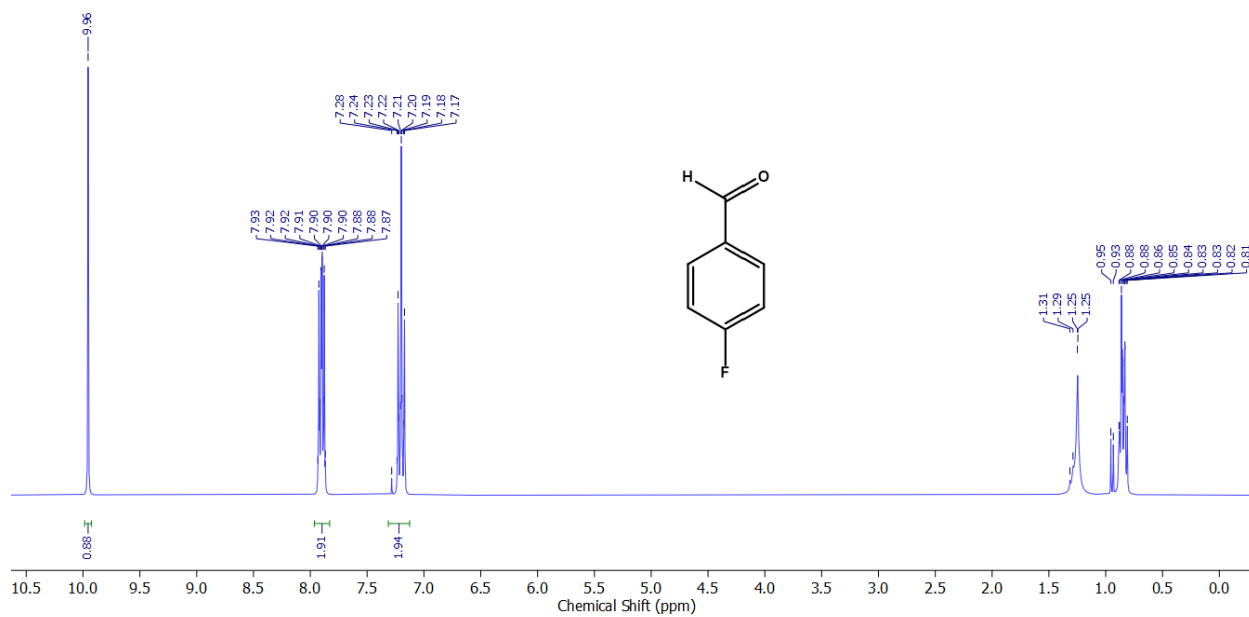

**Fig. S107**  $^1\text{H NMR}$  spectrum of compound **2f'** (300 MHz,  $\text{CDCl}_3$ ).

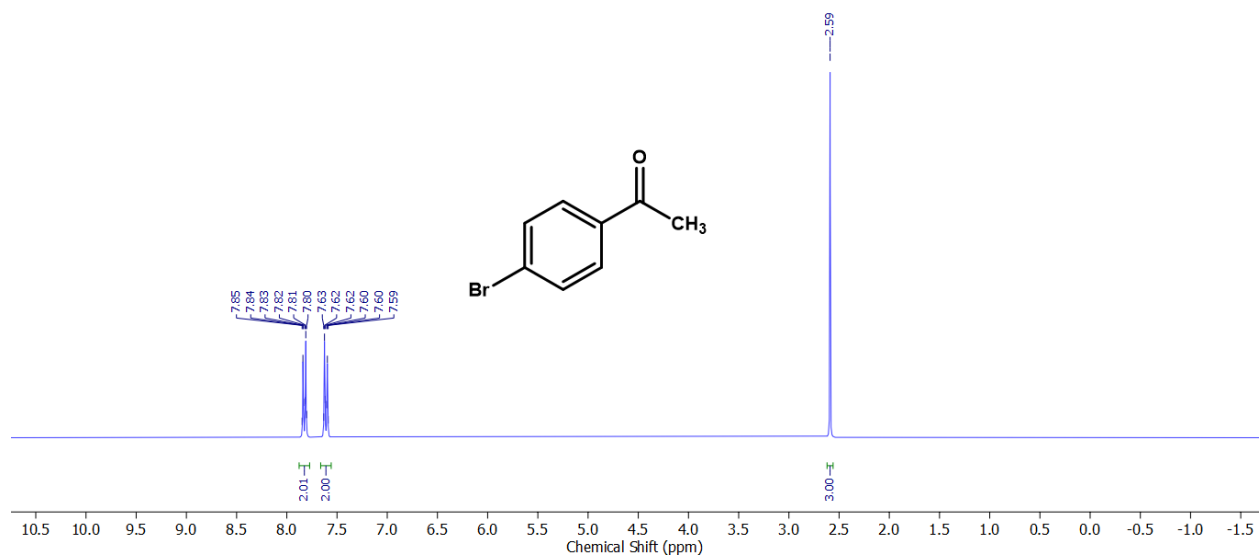

**Fig. S108**  $^1\text{H}$  NMR spectrum of compound **4n''** (300 MHz,  $\text{CDCl}_3$ ).

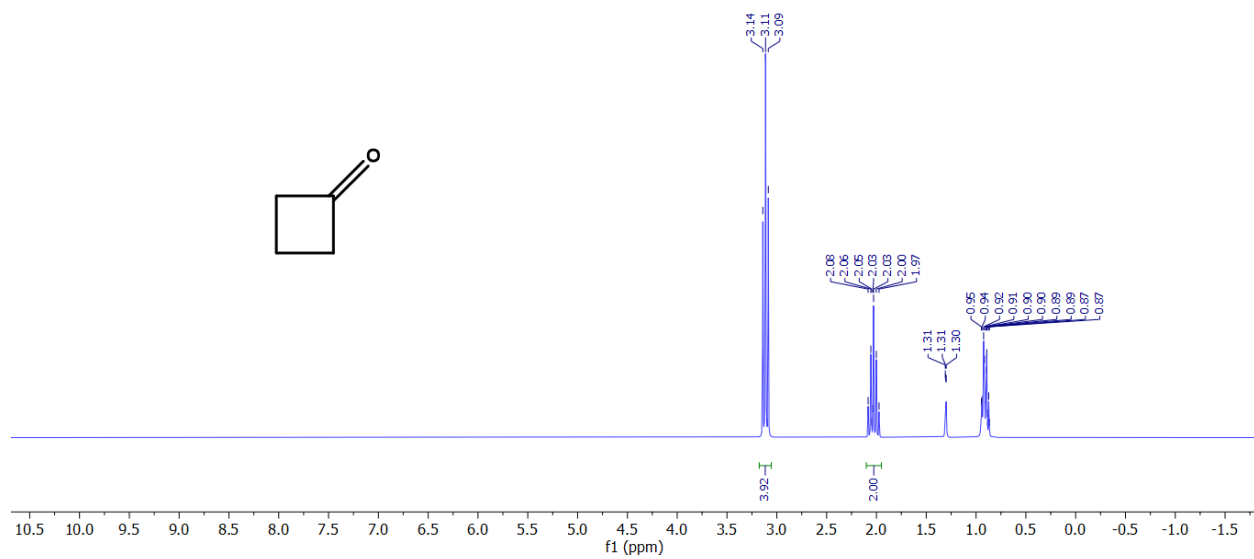

**Fig. S109**  $^1\text{H}$  NMR spectrum of cyclobutanone (300 MHz,  $\text{CDCl}_3$ ).

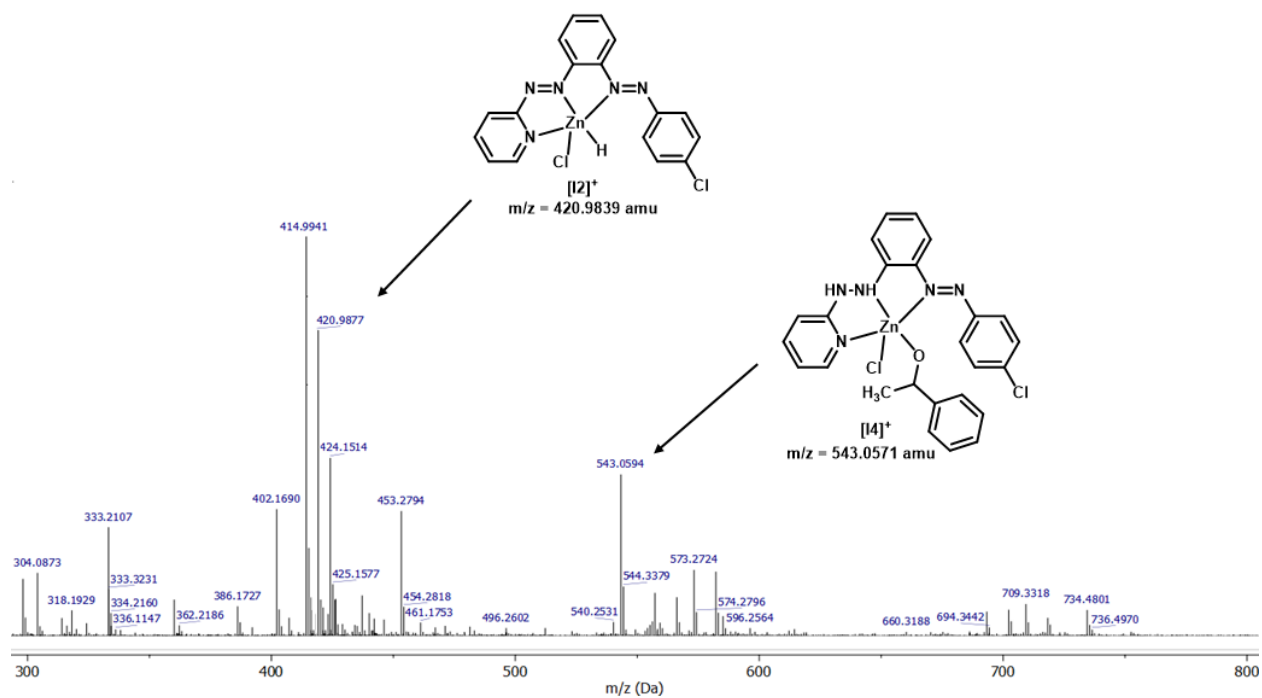

**Fig. S110** HRMS of intermediates  $[I2]^+$ ,  $[I4]^+$ : when the reaction was carried out with 1-phenylethanol and catalyst **1a** in presence of base.



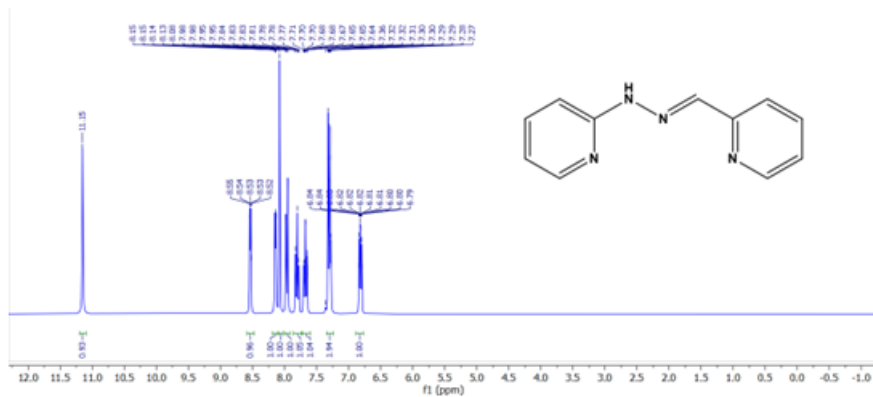

**Pyridyl-Schiff-base ligand**

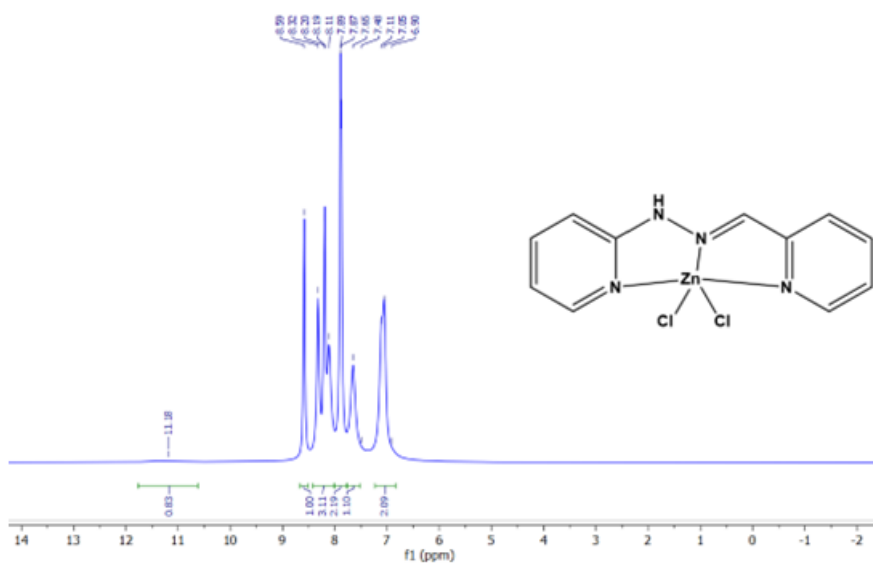

**ZnCl<sub>2</sub>-pyridyl-Schiff-base ligand**

**Fig. S111** <sup>1</sup>H NMR spectrum of ligand (N<sub>py</sub><sup>^</sup>N<sub>imine</sub><sup>^</sup>N<sub>py</sub> = py-CH=N-NH-py) and [Zn(N<sub>py</sub><sup>^</sup>N<sub>imine</sub><sup>^</sup>N<sub>py</sub>)Cl<sub>2</sub>] **1c** (400 MHz, DMSO-*d*<sub>6</sub>).

## Appendix: supplementary data

CCDC deposition numbers 2348683 (**1a**), 2348684 (**1b**), 2349095 (**5ag**) and 2349099 (**10aj**) contain the supplementary crystallographic data for this paper. These data can be obtained free of charge via [www.ccdc.cam.ac.uk/data\\_request/cif](http://www.ccdc.cam.ac.uk/data_request/cif) or by emailing [data\\_request@ccdc.cam.ac.uk](mailto:data_request@ccdc.cam.ac.uk), or by contacting The Cambridge Crystallographic Data Centre, 12 Union Road, Cambridge CB2 1EZ, U.K.; Fax: + 44 1223 336033.

## References

1. A.D. Becke, *J. Chem. Phys.* 1993, **98**, 5648-5652.
2. C. Lee, W. Yang, R.G. Parr, *Phys. Rev. B: Condens. Matter* 1988, **37**, 785-789.
3. M. J. Frisch, G. W. Trucks, H. B. Schlegel, G. E. Scuseria, M. A. Robb, J. R. Cheeseman, G. Scalmani, V. Barone, B. Mennucci, G. A. Petersson, H. Nakatsuji, M. Caricato, X. Li, H. P. Hratchian, A. F. Izmaylov, J. Bloino, G. Zheng, J. L. Sonnenberg, M. Hada, M. Ehara, K. Toyota, R. Fukuda, J. Hasegawa, M. Ishida, T. Nakajima, Y. Honda, O. Kitao, H. Nakai, T. Vreven, J. A. Montgomery Jr., J. E. Peralta, F. Ogliaro, M. Bearpark, J. J. Heyd, E. Brothers, K. N. Kudin, V. N. Staroverov, R. Kobayashi, J. Normand, K. Raghavachari, A. Rendell, J. C. Burant, S. S. Iyengar, J. Tomasi, M. Cossi, N. Rega, J. M. Millam, M. Klene, J. E. Knox, J. B. Cross, V. Bakken, C. Adamo, J. Jaramillo, R. Gomperts, R. E. Stratmann, O. Yazyev, A. J. Austin, R. Cammi, C. Pomelli, J. W. Ochterski, R. L. Martin, K. Morokuma, V. G. Zakrzewski, G. A. Voth, P. Salvador, J. J. Dannenberg, S. Dapprich, A. D. Daniels, O. Farkas, J. B. Foresman, J. V. Ortiz, J. Cioslowski, D. J. Fox, GAUSSIAN 09 (Revision A.01), Gaussian, Inc., Wallingford, CT, (2009).
4. J. Autschbach, T. Ziegler, S.J.A. Gisbergen, E.J. Baerends, *J. Chem. Phys.* 2002, **116**, 6930-6940.
5. K.L. Bak, P. Jørgensen, T. Helgaker, K. Rund, H.J.A. Jensen, *J. Chem. Phys.* 1993, **98**, 8873-8887.
6. T. Helgaker, P. Jørgensen, *J. Chem. Phys.* 1991, **95**, 2595-2601.
7. E.K.U. Gross, W. Kohn, *Adv. Quantum Chem.* 1990, **21**, 255-291.
8. M. Cossi, N. Rega, G. Scalmani, V. Barone, *J. Comput. Chem.* 2003, **24**, 669-681.

9. M. Cossi, V. Barone, *J. Chem. Phys.* 2001, **115**, 4708-4717.
10. V. Barone, M. Cossi, *J. Phys. Chem.* 1998, **102**, 1995-2001.
11. T. Liu, H.X. Zhang, B.H. Xia, *J. Phys. Chem.* 2007, **111**, 8724-8730.
12. A. Albertino, C. Garino, S. Ghiani, *J. Organomet. Chem.* 2007, **692**, 1377-1391.
13. X. Zhou, H.X. Zhang, Q.J. Pan, B.H. Xia, *J. Phys. Chem.* 2005, **109**, 8809-8818.
14. X. Zhou, A.M. Ren, J.K. Feng, *J. Organomet. Chem.* 2005, **690**, 338-347.
15. P.J. Hay, W.R. Wadt, *J. Chem. Phys.* 1985, **82**, 299-310.
16. P.J. Hay, W.R. Wadt, *J. Chem. Phys.* **82** (1985) 270–283.
17. M.S. Gordon, J.S. Binkley, J.A. Pople, W.J. Pietro, W.J. Hehre, *J. Am. Chem. Soc.* 1982, **104**, 2797-2803.
18. J.S. Binkley, J.A. Pople, W.J. Hehre, *J. Am. Chem. Soc.* 1980, **102**, 939-947.
19. N.M. O’Boyle, A.L. Tenderholt, K.M. Langner, *J. Comput. Chem.* 2008, **29**, 839-845.
20. S. Roy, S. Pramanik, S. C. Patra, B. Adhikari, A. Mondal, S. Ganguly and K. Pramanik, *Inorg. Chem.*, 2017, **56**, 12764–12774.
21. SAINT, Data Reduction and Frame Integration Program for the CCD Area-Detector System. Bruker Analytical X-ray Systems, Madison, Wisconsin, USA, 1997–2006.
22. G.M. Sheldrick, SADABS, Program for Area Detector Absorption Correction, Institute for Inorganic Chemistry, University of Göttingen, Germany (1996).
23. G.M. Sheldrick, *Acta Crystallogr. Sect. C: Struct. Chem.* 2015, **71**, 3-8.
24. O.V. Dolomanov, L.J. Bourhis, R.J. Gildea, J.A.K. Howard, H. Puschmann, *J. Appl. Cryst.* 2009, **42**, 339-341.
25. A. Charvieux, J. B. Giorgi, N. Duguet, E. Métay, *Green Chem.* 2018, **20**, 4210-4216.
26. G. Zhang, J. Wu, H. Zeng, S. Zhang, Z. Yin, S. Zheng, *Org. Lett.* 2017, **19**, 1080–1083.
27. C. Chaudhari, K. Sato, Y. Ogura, S.-I. Miyahara, K. Nagaoka, *ChemCatChem* 2020, **12**, 2198–22.
28. B. Guo, T.-Q. Yu, H.-X. Li, S.-Q. Zhang, P. Braunstein, D. J. Young, H.-Y. Li, J.-P. Lang, *ChemCatChem* 2019, **11**, 2500–2510.
29. S. Das, S. Sinha, D. Samanta, R. Mondal, Gargi Chakraborty, P. Brandaõ, N. D. Paul, *J. Org. Chem.* 2019, **84**, 10160–10171.
30. A. Maji, A. Singh, N. Singh, K. Ghosh, *ChemCatChem* 2020, **12**, 3108–3125.

31. S. Chakraborty, R. Mondal, S. Pal, A. K. Guin, L. Roy, N. D. Paul, *J. Org. Chem.* 2023, **88**, 771–787.
32. K. Das, A. Mondala, D. Srimani, *Chem. Commun.* 2018, **54**, 10582-10585.
33. J. Zhou, Y. Zou, P. Zhou, Z. Chen and J. Li, *Org. Chem. Front.*, 2019, **6**, 1594-1598.
